# Supplementary material for: Identifying novel candidate compounds for therapeutic strategies in retinopathy of prematurity via computational drug-gene association analysis
Source: Front Pediatr. 2023 Jul 10;11:1151239. doi: 10.3389/fped.2023.1151239 (PMC10365641; doi:10.3389/fped.2023.1151239)
Supplement: Supplementary file 1 [file Table1.xlsx]

## Sheet: ALL ROP Drugs
Unfiltered Position	ID	Name	Source	p-value	q-value Bonferroni	q-value FDR B&H	q-value FDR B&Y	Hit Count in Query List	Hit Count in Genome	Hit in Query List
1	ctd:D001205	Ascorbic Acid	CTD	7.757e-21	1.301e-16	1.301e-16	1.34e-15	21	626	EPHX2,FLT1,HIF1A,IGF1,NAMPT,IGF1R,CASP8,C3,KDR,TNF,C5,IHH,ACE,NOS3,IL6,PRL,EPAS1,BDNF,LGALS1,VEGFA,CYBA
2	CID000000501	AC1Q5S71	Stitch	2.682e-19	4.496e-15	2.248e-15	2.317e-14	14	170	ARG2,SEMA3A,FLT1,HIF1A,IGF1,IGF1R,ANGPT1,ANGPT2,TNF,ACE,NOS3,IL6,PRL,VEGFA
3	ctd:C107676	deguelin	CTD	8.954e-19	1.501e-14	5.005e-15	5.157e-14	13	137	FZD4,HIF1A,IGF1,IGF1R,CASP8,KDR,TNF,IHH,NOS3,IL6,EPAS1,BDNF,VEGFA
4	ctd:D019821	Simvastatin	CTD	1.443e-18	2.42e-14	5.79e-15	5.967e-14	19	581	GSTP1,EPO,FLT1,HIF1A,IGF1,IGF1R,ANGPT1,ANGPT2,MTHFR,CASP8,KDR,CCL5,TNF,F2,NOS3,IL6,BDNF,VEGFA,CYBA
5	ctd:C085911	2-(4-morpholinyl)-8-phenyl-4H-1-benzopyran-4-one	CTD	1.749e-18	2.933e-14	5.79e-15	5.967e-14	17	400	ARG2,GSTP1,EPO,HIF1A,IGF1,ANGPT1,APLN,CASP8,CCL5,TNF,ATF4,F2,NOS3,IL6,EPAS1,BDNF,VEGFA
6	ctd:D017382	Reactive Oxygen Species	CTD	2.072e-18	3.474e-14	5.79e-15	5.967e-14	16	325	EPO,HIF1A,IGF1,NAMPT,CASP8,C3,CCL5,TNF,ATF4,TEAD4,F2,NOS3,IL6,LGALS1,VEGFA,CYBA
7	ctd:D000111	Acetylcysteine	CTD	1.597e-17	2.677e-13	3.825e-14	3.941e-13	20	780	GSTP1,FLT1,HIF1A,IGF1,IGF1R,ANGPT1,MALAT1,CASP8,C3,KDR,CCL5,TNF,ATF4,NOS3,IL6,PRL,EPAS1,BDNF,VEGFA,CYBA
8	CID000003460	geldanamicin	Stitch	1.853e-17	3.106e-13	3.883e-14	4.001e-13	16	373	SEMA3A,FLT1,HIF1A,IGF1,NAMPT,IGF1R,ANGPT1,ANGPT2,HLA-B,CASP8,KDR,TNF,F2,NOS3,IL6,VEGFA
9	ctd:D013311	Streptozocin	CTD	1.911e-16	3.205e-12	3.561e-13	3.669e-12	19	757	EPHX2,GSTP1,EPO,FLT1,HIF1A,IGF1,NAMPT,ANGPT1,ANGPT2,LRP5,CASP8,KDR,TNF,ATF4,ACE,NOS3,IL6,VEGFA,CYBA
10	CID006323299	1m0q	Stitch	1.592e-15	2.669e-11	2.669e-12	2.751e-11	10	86	EPO,FLT1,HIF1A,IGF1,IGF1R,ANGPT1,ANGPT2,KDR,NOS3,VEGFA
11	CID004634040	AC1NDZBW	Stitch	2.685e-15	4.502e-11	4.093e-12	4.218e-11	12	187	EPO,FLT1,HIF1A,NAMPT,NAA15,ANGPT1,ANGPT2,KDR,CCL5,IL6,EPAS1,VEGFA
12	ctd:D009569	Nitric Oxide	CTD	3.909e-15	6.554e-11	5.369e-12	5.533e-11	14	336	EPO,HIF1A,HLA-DRB1,CASP8,CCL5,TNF,F2,ACE,NOS3,IL6,PRL,EPAS1,BDNF,VEGFA
13	ctd:D009525	Niacin (B3)	CTD	4.243e-15	7.114e-11	5.369e-12	5.533e-11	11	139	HIF1A,ANGPT1,ANGPT2,KDR,TNF,ACE,NOS3,IL6,BDNF,VEGFA,CYBA
14	CID000008839	ricinelaidic acid (castor oil)	Stitch	4.483e-15	7.517e-11	5.369e-12	5.533e-11	10	95	SEMA3A,EPO,FLT1,IGF1,IGF1R,ANGPT1,ANGPT2,KDR,TNF,VEGFA
15	CID000145068	nitric oxide	Stitch	7.392e-15	1.239e-10	8.262e-12	8.514e-11	20	1075	ARG2,GSTP1,EPO,FLT1,HIF1A,IGF1,ANGPT1,CASP8,KDR,CCL5,TNF,F2,ACE,NOS3,IL6,PRL,EPAS1,BDNF,VEGFA,CYBA
16	ctd:C025340	manganese chloride	CTD	1.114e-14	1.869e-10	1.168e-11	1.203e-10	15	456	FLT1,HIF1A,IGF1,NAMPT,IGF1R,ANGPT2,CASP8,TNF,ATF4,NOS3,IL6,PRL,EPAS1,BDNF,VEGFA
17	ctd:D010396	Penicillamine	CTD	2.035e-14	3.412e-10	2.007e-11	2.068e-10	10	110	IGF1,HLA-A,HLA-B,HLA-DRB1,C3,CCL5,TNF,IL6,PRL,LGALS1
18	ctd:D003474	Curcumin	CTD	2.743e-14	4.6e-10	2.412e-11	2.485e-10	18	850	GSTP1,EPO,FLT1,HIF1A,IGF1,IGF1R,LRP5,CASP8,C3,KDR,TNF,F2,ACE,NOS3,IL6,EPAS1,BDNF,VEGFA
19	ctd:D019808	Losartan	CTD	2.876e-14	4.822e-10	2.412e-11	2.485e-10	11	165	FLT1,CASP8,KDR,CCL5,TNF,ACE,NOS3,IL6,PRL,VEGFA,CYBA
20	ctd:D002211	Capsaicin	CTD	2.999e-14	5.028e-10	2.412e-11	2.485e-10	15	488	GSTP1,HIF1A,IGF1,IGF1R,ANGPT1,ANGPT2,CASP8,TNF,ATF4,F2,NOS3,IL6,BDNF,LGALS1,VEGFA
21	ctd:D009637	Masoprocol	CTD	3.02e-14	5.064e-10	2.412e-11	2.485e-10	9	74	IGF1,IGF1R,CASP8,CCL5,TNF,NOS3,IL6,PRL,VEGFA
22	ctd:D008687	Metformin	CTD	4.298e-14	7.207e-10	3.276e-11	3.376e-10	14	400	TSPAN12,GSTP1,HIF1A,IGF1,NAMPT,IGF1R,CASP8,TNF,ATF4,NOS3,IL6,PRL,VEGFA,CYBA
23	ctd:C093973	2-(2-amino-3-methoxyphenyl)-4H-1-benzopyran-4-one	CTD	4.602e-14	7.716e-10	3.355e-11	3.457e-10	14	402	GSTP1,HIF1A,IGF1,ANGPT1,CASP8,CCL5,TNF,C5,NOS3,IL6,PRL,EPAS1,BDNF,VEGFA
24	ctd:D052638	Particulate Matter	CTD	5.233e-14	8.773e-10	3.656e-11	3.767e-10	23	1747	ARG2,FZD4,GSTP1,EPO,HIF1A,IGF1,ANGPT2,LRP5,CASP8,C3,KDR,CCL5,TNF,ATF4,C5,TEAD4,ACE,NOS3,IL6,EPAS1,BDNF,VEGFA,CYBA
25	CID000003973	LY294002	Stitch	5.52e-14	9.256e-10	3.702e-11	3.815e-10	17	748	EPO,FLT1,HIF1A,IGF1,IGF1R,ANGPT1,APLN,CASP8,KDR,TNF,C5,NOS3,IL6,PRL,EPAS1,BDNF,VEGFA
26	CID000004367	L-NNA	Stitch	6.566e-14	1.101e-09	4.234e-11	4.363e-10	12	244	ARG2,EPO,FLT1,IGF1,KDR,TNF,ACE,NOS3,IL6,BDNF,VEGFA,CYBA
27	ctd:D004656	Enalapril	CTD	1.213e-13	2.034e-09	7.533e-11	7.763e-10	10	131	EPO,IGF1,ANGPT2,KDR,TNF,ACE,NOS3,IL6,VEGFA,CYBA
28	ctd:D011692	Puromycin Aminonucleoside	CTD	1.538e-13	2.578e-09	9.208e-11	9.488e-10	11	192	GSTP1,FLT1,ANGPT1,C3,KDR,TNF,C5,ACE,NOS3,LGALS1,VEGFA
29	ctd:D015735	Mifepristone	CTD	1.84e-13	3.085e-09	1.064e-10	1.096e-09	15	553	FZD4,FLT1,IGF1,ANGPT2,CASP8,C3,KDR,TNF,NDP,ACE,NOS3,IL6,PRL,BDNF,VEGFA
30	CID000448249	O-Ir	Stitch	2.697e-13	4.522e-09	1.475e-10	1.52e-09	8	57	SEMA3A,FLT1,HIF1A,IGF1,ANGPT2,KDR,EPAS1,VEGFA
31	CID000000450	17alpha-estradiol	Stitch	2.727e-13	4.572e-09	1.475e-10	1.52e-09	20	1303	GSTP1,EPO,HIF1A,IGF1,IGF1R,ANGPT1,LRP5,CASP8,C3,KDR,CCL5,TNF,IHH,ACE,NOS3,IL6,PRL,BDNF,LGALS1,VEGFA
32	ctd:D003609	Dactinomycin	CTD	5.105e-13	8.559e-09	2.675e-10	2.756e-09	12	290	GSTP1,HIF1A,IGF1,CASP8,TNF,ATF4,ACE,IL6,PRL,EPAS1,BDNF,VEGFA
33	ctd:D013205	Staphylococcal Protein A	CTD	6.303e-13	1.057e-08	3.143e-10	3.239e-09	5	7	EPO,C3,TNF,C5,IL6
34	ctd:D005472	Fluorouracil	CTD	6.373e-13	1.069e-08	3.143e-10	3.239e-09	20	1364	SEMA3A,GSTP1,EPO,FLT1,HIF1A,IGF1,IGF1R,ANGPT1,ANGPT2,MTHFR,MALAT1,CASP8,KDR,TNF,IHH,F2,IL6,EPAS1,BDNF,VEGFA
35	ctd:D003520	Cyclophosphamide	CTD	7.041e-13	1.181e-08	3.373e-10	3.476e-09	15	607	GSTP1,EPO,HIF1A,NAMPT,ANGPT1,SCG3,CASP8,C3,KDR,TNF,NOS3,IL6,BDNF,LGALS1,VEGFA
36	ctd:D008063	Thioctic Acid (alpha lipoic acid)	CTD	1.038e-12	1.74e-08	4.835e-10	4.982e-09	10	162	GSTP1,FLT1,APLN,CASP8,TNF,ATF4,ACE,NOS3,IL6,VEGFA
37	ctd:D005665	Furosemide	CTD	1.174e-12	1.969e-08	5.234e-10	5.394e-09	10	164	FLT1,IGF1,ANGPT2,HLA-B,CASP8,KDR,TNF,NOS3,IL6,VEGFA
38	ctd:C005435	phenylmethylpyrazolone	CTD	1.186e-12	1.989e-08	5.234e-10	5.394e-09	8	68	EPHX2,FLT1,HIF1A,CASP8,TNF,NOS3,IL6,VEGFA
39	ctd:D010269	Paraquat	CTD	1.744e-12	2.924e-08	7.497e-10	7.725e-09	21	1636	ARG2,FZD4,GSTP1,EPO,HIF1A,IGF1,NAMPT,IGF1R,MTHFR,SCG3,CASP8,TNF,ATF4,NDP,F2,ACE,NOS3,IL6,PRL,BDNF,VEGFA
40	ctd:D012965	Sodium Chloride	CTD	1.956e-12	3.279e-08	8.197e-10	8.447e-09	9	116	HIF1A,CASP8,CCL5,TNF,ACE,NOS3,IL6,VEGFA,CYBA
41	CID000002907	cyclophosphamide	Stitch	2.1e-12	3.521e-08	8.485e-10	8.743e-09	12	327	GSTP1,EPO,IGF1,ANGPT1,HLA-A,CCL5,TNF,IL6,BDNF,LGALS1,VEGFA,CYBA
42	CID000004366	L-NMMA	Stitch	2.125e-12	3.564e-08	8.485e-10	8.743e-09	10	174	ARG2,EPO,IGF1,TNF,F2,ACE,NOS3,IL6,PRL,VEGFA
43	CID000005637	U0126	Stitch	2.553e-12	4.281e-08	9.955e-10	1.026e-08	13	430	EPO,HIF1A,IGF1,IGF1R,CASP8,CCL5,TNF,F2,NOS3,IL6,PRL,BDNF,VEGFA
44	CID005280961	genistein	Stitch	2.8e-12	4.695e-08	1.067e-09	1.099e-08	18	1117	EPO,FLT1,HIF1A,IGF1,IGF1R,ANGPT1,C3,KDR,CCL5,TNF,F2,ACE,NOS3,IL6,PRL,BDNF,VEGFA,CYBA
45	CID000086807	T-E-A-T	Stitch	2.989e-12	5.012e-08	1.114e-09	1.148e-08	8	76	FLT1,IGF1,IGF1R,KDR,TNF,IL6,PRL,VEGFA
46	ctd:C020809	tetrathiomolybdate	CTD	3.706e-12	6.214e-08	1.351e-09	1.392e-08	8	78	HIF1A,IGF1,IGF1R,ANGPT2,CASP8,TNF,IL6,VEGFA
47	CID000002250	AC1L1D9C	Stitch	4.503e-12	7.55e-08	1.606e-09	1.655e-08	12	349	EPHX2,NAMPT,HLA-A,C3,TNF,F2,ACE,NOS3,IL6,BDNF,VEGFA,CYBA
48	ctd:D020123	Sirolimus	CTD	5.335e-12	8.946e-08	1.813e-09	1.869e-08	13	456	HIF1A,IGF1,IGF1R,CASP8,C3,TNF,ATF4,F2,NOS3,IL6,BDNF,VEGFA,CYBA
49	CID000003003	Betamethasone-d5	Stitch	5.348e-12	8.967e-08	1.813e-09	1.869e-08	19	1340	GSTP1,FLT1,HIF1A,IGF1,NAMPT,IGF1R,ANGPT1,CASP8,KDR,CCL5,TNF,F2,ACE,NOS3,IL6,PRL,BDNF,VEGFA,CYBA
50	CID000000778	homocysteine	Stitch	5.408e-12	9.067e-08	1.813e-09	1.869e-08	11	266	HLA-B,MTHFR,CCL5,TNF,ATF4,F2,ACE,F5,NOS3,IL6,VEGFA
51	ctd:C009687	wortmannin	CTD	5.632e-12	9.443e-08	1.852e-09	1.908e-08	11	267	GSTP1,HIF1A,IGF1,CASP8,CCL5,TNF,C5,NOS3,IL6,BDNF,VEGFA
52	ctd:D009538	Nicotine	CTD	5.912e-12	9.913e-08	1.906e-09	1.964e-08	17	1001	EPO,HIF1A,IGF1,NAMPT,IGF1R,MALAT1,CASP8,KDR,CCL5,TNF,F2,ACE,NOS3,IL6,BDNF,LGALS1,VEGFA
53	CID000000784	H2O2	Stitch	7.296e-12	1.223e-07	2.308e-09	2.378e-08	18	1183	GSTP1,EPO,HIF1A,IGF1,NAMPT,IGF1R,CASP8,KDR,TNF,NDP,F2,ACE,NOS3,IL6,EPAS1,LGALS1,VEGFA,CYBA
54	CID000006569	methyl ethyl ketone	Stitch	7.684e-12	1.288e-07	2.386e-09	2.459e-08	14	587	EPO,FLT1,HIF1A,IGF1,IGF1R,CASP8,KDR,TNF,F2,NOS3,IL6,BDNF,VEGFA,CYBA
55	ctd:C010643	6-hydroxy-2,5,7,8-tetramethylchroman-2-carboxylic acid	CTD	8.284e-12	1.389e-07	2.526e-09	2.602e-08	8	86	FLT1,HIF1A,CASP8,KDR,TNF,IL6,EPAS1,VEGFA
56	ctd:C029341	oxophenylarsine	CTD	9.109e-12	1.527e-07	2.727e-09	2.81e-08	8	87	GSTP1,HIF1A,IGF1,TNF,NOS3,IL6,PRL,LGALS1
57	ctd:D008911	Minocycline	CTD	1.001e-11	1.678e-07	2.943e-09	3.033e-08	8	88	HIF1A,HLA-A,HLA-B,CASP8,CCL5,TNF,IL6,VEGFA
58	ctd:D015127	9,10-Dimethyl-1,2-benzanthracene	CTD	1.185e-11	1.987e-07	3.425e-09	3.53e-08	17	1046	ARG2,EPHX2,GSTP1,EPO,FLT1,HIF1A,IGF1,APLN,CASP8,C3,KDR,CCL5,TNF,IL6,PRL,BDNF,VEGFA
59	ctd:D005947	Glucose	CTD	1.487e-11	2.493e-07	4.225e-09	4.354e-08	19	1421	ARG2,SEMA3A,HIF1A,IGF1,NAMPT,IGF1R,NAA15,CASP8,C3,KDR,CCL5,TNF,ATF4,ACE,NOS3,IL6,LGALS1,VEGFA,CYBA
60	CID006437335	NSC 402447	Stitch	1.573e-11	2.638e-07	4.396e-09	4.53e-08	8	93	SEMA3A,EPO,FLT1,HIF1A,IGF1,IGF1R,ANGPT1,IL6
61	ctd:D010656	Phenylephrine	CTD	1.909e-11	3.2e-07	5.246e-09	5.406e-08	13	505	EPHX2,FLT1,IGF1,ANGPT1,KDR,TNF,C5,ACE,NOS3,IL6,EPAS1,BDNF,VEGFA
62	ctd:C073402	PD 123319	CTD	2.023e-11	3.392e-07	5.471e-09	5.637e-08	6	28	ANGPT1,ANGPT2,KDR,CCL5,NOS3,VEGFA
63	ctd:C084178	telmisartan	CTD	2.219e-11	3.72e-07	5.905e-09	6.085e-08	8	97	CCL5,TNF,ACE,NOS3,IL6,BDNF,VEGFA,CYBA
64	ctd:D015232	Dinoprostone	CTD	2.736e-11	4.588e-07	7.169e-09	7.387e-08	10	225	EPHX2,HIF1A,CASP8,CCL5,TNF,F2,ACE,IL6,PRL,VEGFA
65	ctd:D014013	1,2-Dihydroxybenzene-3,5-Disulfonic Acid Disodium Salt	CTD	2.782e-11	4.664e-07	7.175e-09	7.393e-08	7	58	HIF1A,IGF1,CASP8,TNF,ATF4,NOS3,IL6
66	CID000005426	thalidomide	Stitch	3.256e-11	5.459e-07	8.271e-09	8.523e-08	10	229	EPO,FLT1,ANGPT1,ANGPT2,KDR,TNF,NOS3,IL6,PRL,VEGFA
67	ctd:C010845	aluminum chloride	CTD	3.341e-11	5.602e-07	8.362e-09	8.616e-08	8	102	EPO,IGF1,LRP5,CASP8,TNF,IL6,PRL,BDNF
68	ctd:C007095	cobaltiprotoporphyrin	CTD	3.417e-11	5.729e-07	8.425e-09	8.681e-08	9	159	FLT1,HIF1A,IGF1,CASP8,TNF,NOS3,IL6,EPAS1,VEGFA
69	CID000005650	AC1Q5S0Y	Stitch	3.617e-11	6.065e-07	8.79e-09	9.057e-08	8	103	ANGPT1,ANGPT2,TNF,ACE,NOS3,IL6,VEGFA,CYBA
70	ctd:C432165	pyrazolanthrone	CTD	4.228e-11	7.089e-07	1.013e-08	1.044e-07	11	322	HIF1A,IGF1,CASP8,CCL5,TNF,ATF4,F2,IL6,BDNF,VEGFA,CYBA
71	CID000005691	wartmannin	Stitch	4.309e-11	7.225e-07	1.018e-08	1.049e-07	15	811	EPO,FLT1,HIF1A,IGF1,IGF1R,ANGPT1,CASP8,KDR,CCL5,TNF,F2,NOS3,IL6,BDNF,VEGFA
72	CID000002909	cyclophorine	Stitch	4.566e-11	7.656e-07	1.049e-08	1.081e-07	12	426	EPO,IGF1,HLA-A,HLA-B,CASP8,CCL5,TNF,ACE,NOS3,IL6,PRL,VEGFA
73	ctd:C007350	nitrofen	CTD	4.567e-11	7.657e-07	1.049e-08	1.081e-07	10	237	EPO,IGF1,IGF1R,APLN,TNF,ACE,NOS3,IL6,EPAS1,VEGFA
74	ctd:D002857	Chromium	CTD	4.76e-11	7.981e-07	1.078e-08	1.111e-07	10	238	HIF1A,IGF1,CASP8,C3,TNF,ACE,F5,NOS3,IL6,PRL
75	CID000000581	N-acetylcysteine	Stitch	5.028e-11	8.431e-07	1.124e-08	1.158e-07	13	546	GSTP1,EPO,FLT1,HIF1A,IGF1,MTHFR,CASP8,CCL5,TNF,ACE,NOS3,IL6,VEGFA
76	CID000005262	AC1L1JYL	Stitch	5.659e-11	9.489e-07	1.249e-08	1.287e-07	12	434	FLT1,HIF1A,IGF1,IGF1R,ANGPT1,CASP8,KDR,CCL5,TNF,F2,NOS3,VEGFA
77	ctd:D008550	Melatonin	CTD	5.84e-11	9.791e-07	1.272e-08	1.31e-07	10	243	GSTP1,IGF1,CASP8,CCL5,TNF,ATF4,NOS3,IL6,PRL,VEGFA
78	ctd:D007052	Ibuprofen	CTD	6.127e-11	1.027e-06	1.317e-08	1.357e-07	12	437	GSTP1,HIF1A,IGF1,NAMPT,C3,TNF,ATF4,NOS3,IL6,EPAS1,LGALS1,VEGFA
79	ctd:D009543	Nifedipine	CTD	7.135e-11	1.196e-06	1.514e-08	1.56e-07	8	112	GSTP1,IGF1,NAMPT,TNF,NOS3,PRL,BDNF,VEGFA
80	ctd:D016559	Tacrolimus	CTD	7.327e-11	1.228e-06	1.517e-08	1.563e-07	11	339	IGF1,CASP8,C3,CCL5,TNF,ATF4,NOS3,IL6,BDNF,VEGFA,CYBA
81	ctd:D005978	Glutathione	CTD	7.327e-11	1.228e-06	1.517e-08	1.563e-07	11	339	GSTP1,EPO,HIF1A,IGF1,CASP8,CCL5,TNF,C5,IL6,EPAS1,VEGFA
82	ctd:D003513	Cycloheximide	CTD	7.748e-11	1.299e-06	1.584e-08	1.633e-07	12	446	EPO,HIF1A,IGF1,CASP8,CCL5,TNF,ATF4,F2,NOS3,IL6,EPAS1,VEGFA
83	ctd:C007517	diphenyleneiodonium	CTD	8.233e-11	1.38e-06	1.663e-08	1.714e-07	8	114	HIF1A,IGF1,ANGPT2,CASP8,TNF,IL6,VEGFA,CYBA
84	CID000014819	lead sulfide	Stitch	1.134e-10	1.901e-06	2.244e-08	2.312e-07	10	260	FLT1,ANGPT1,HLA-A,KDR,CCL5,TNF,NOS3,IL6,BDNF,VEGFA
85	ctd:D017239	Paclitaxel	CTD	1.148e-10	1.925e-06	2.244e-08	2.312e-07	14	720	EPHX2,GSTP1,EPO,FLT1,NAMPT,ANGPT1,LRP5,CASP8,C3,TNF,F2,NOS3,IL6,VEGFA
86	CID000004792	phorbol acetate myristate	Stitch	1.158e-10	1.942e-06	2.244e-08	2.312e-07	18	1399	GSTP1,EPO,FLT1,HIF1A,IGF1,NAMPT,IGF1R,ANGPT2,CASP8,CCL5,TNF,F2,ACE,NOS3,IL6,PRL,VEGFA,CYBA
87	ctd:D000068756	Valsartan	CTD	1.164e-10	1.952e-06	2.244e-08	2.312e-07	8	119	ANGPT1,ANGPT2,KDR,TNF,ACE,NOS3,IL6,VEGFA
88	ctd:D004365	Drugs, Chinese Herbal	CTD	1.203e-10	2.017e-06	2.292e-08	2.362e-07	13	586	EPO,FLT1,HIF1A,IGF1,NAMPT,MALAT1,CASP8,TNF,NDP,IHH,NOS3,IL6,VEGFA
89	ctd:D015082	2,2'-Dipyridyl	CTD	1.293e-10	2.168e-06	2.436e-08	2.51e-07	5	16	HIF1A,TNF,IL6,EPAS1,VEGFA
90	ctd:D006581	Hexachlorobenzene	CTD	1.327e-10	2.225e-06	2.472e-08	2.547e-07	9	185	EPHX2,GSTP1,IGF1,IGF1R,CASP8,KDR,IL6,PRL,VEGFA
91	CID000003637	hydralazine	Stitch	1.392e-10	2.334e-06	2.537e-08	2.615e-07	9	186	GSTP1,HIF1A,NAA15,CASP8,ACE,NOS3,IL6,VEGFA,CYBA
92	ctd:D000069059	Atorvastatin Calcium	CTD	1.392e-10	2.334e-06	2.537e-08	2.615e-07	9	186	ANGPT2,CASP8,C3,TNF,F2,F5,NOS3,IL6,CYBA
93	ctd:C101044	tyrphostin AG 1478	CTD	1.423e-10	2.386e-06	2.565e-08	2.644e-07	8	122	FLT1,ANGPT1,ANGPT2,TNF,ACE,NOS3,IL6,VEGFA
94	CID000006436	triamcinolone acetonide	Stitch	1.473e-10	2.47e-06	2.6e-08	2.679e-07	7	73	FLT1,IGF1,IGF1R,HLA-A,CASP8,IL6,VEGFA
95	CID000178024	MK-677	Stitch	1.473e-10	2.47e-06	2.6e-08	2.679e-07	7	73	FLT1,IGF1,IGF1R,KDR,IL6,PRL,VEGFA
96	ctd:D017638	Asbestos, Crocidolite	CTD	1.695e-10	2.842e-06	2.96e-08	3.05e-07	17	1240	SEMA3A,FLT1,HIF1A,IGF1,NAMPT,IGF1R,NAA15,CASP8,KDR,TNF,ATF4,C5,IL6,EPAS1,BDNF,VEGFA,CYBA
97	ctd:C031293	calcium silicate	CTD	1.829e-10	3.066e-06	3.161e-08	3.258e-07	5	17	FLT1,IGF1,KDR,IL6,VEGFA
98	CID005356750	Evans blue dye	Stitch	1.966e-10	3.296e-06	3.363e-08	3.465e-07	8	127	EPO,ANGPT1,HLA-A,TNF,ACE,NOS3,IL6,VEGFA
99	CID000002900	isocycloheximide	Stitch	1.992e-10	3.339e-06	3.373e-08	3.476e-07	15	905	HIF1A,IGF1,NAMPT,IGF1R,CASP8,CCL5,TNF,IHH,F2,ACE,NOS3,IL6,PRL,BDNF,VEGFA
100	ctd:C095512	alpha-cyano-(3,4-dihydroxy)-N-benzylcinnamide	CTD	2.16e-10	3.623e-06	3.623e-08	3.733e-07	7	77	IGF1,CCL5,TNF,ACE,IL6,PRL,VEGFA
101	ctd:C025589	ochratoxin A	CTD	2.183e-10	3.66e-06	3.624e-08	3.734e-07	15	911	GSTP1,HIF1A,IGF1,IGF1R,ANGPT1,CASP8,TNF,IHH,F2,F5,IL6,EPAS1,BDNF,VEGFA,CYBA
102	ctd:D003620	Dantrolene	CTD	2.366e-10	3.968e-06	3.88e-08	3.998e-07	6	41	IGF1,CCL5,TNF,ATF4,IL6,BDNF
103	ctd:C031462	titanium alloy (TiAl6V4)	CTD	2.383e-10	3.996e-06	3.88e-08	3.998e-07	4	6	HIF1A,TNF,IL6,VEGFA
104	ctd:D002118	Calcium	CTD	2.444e-10	4.098e-06	3.941e-08	4.061e-07	12	493	EPHX2,IGF1,KDR,CCL5,TNF,C5,F2,NOS3,IL6,PRL,BDNF,VEGFA
105	ctd:C041125	quinapril	CTD	2.528e-10	4.239e-06	4.037e-08	4.16e-07	5	18	F2,ACE,F5,NOS3,IL6
106	CID000005372	NSC717865	Stitch	2.991e-10	5.016e-06	4.732e-08	4.876e-07	11	387	IGF1,IGF1R,HLA-A,CASP8,CCL5,TNF,NOS3,IL6,PRL,BDNF,VEGFA
107	ctd:C093642	SB 203580	CTD	3.074e-10	5.154e-06	4.812e-08	4.959e-07	11	388	ARG2,GSTP1,HIF1A,IGF1,CASP8,CCL5,TNF,NOS3,IL6,VEGFA,CYBA
108	ctd:D014118	Toxins, Biological	CTD	3.1e-10	5.197e-06	4.812e-08	4.959e-07	13	633	ANGPT1,ANGPT2,CASP8,C3,KDR,CCL5,TNF,IHH,ACE,IL6,EPAS1,LGALS1,VEGFA
109	CID000001117	sulfate	Stitch	3.198e-10	5.361e-06	4.919e-08	5.069e-07	17	1292	ARG2,SEMA3A,GSTP1,HIF1A,IGF1,NAMPT,IGF1R,HLA-A,HLA-B,HLA-DRB1,C3,CCL5,TNF,IHH,F2,IL6,LGALS1
110	CID000005040	NSC226080	Stitch	3.382e-10	5.67e-06	5.155e-08	5.312e-07	14	782	FLT1,HIF1A,IGF1,IGF1R,KDR,TNF,TEAD4,F2,NOS3,IL6,PRL,EPAS1,BDNF,VEGFA
111	ctd:D047310	Apigenin	CTD	3.604e-10	6.044e-06	5.445e-08	5.61e-07	9	207	HIF1A,CASP8,TNF,F2,ACE,NOS3,IL6,BDNF,VEGFA
112	ctd:D005688	Galactosamine	CTD	3.696e-10	6.197e-06	5.533e-08	5.701e-07	7	83	CASP8,CCL5,TNF,ATF4,IL6,VEGFA,CYBA
113	ctd:C015001	arsenite	CTD	4.059e-10	6.805e-06	6.023e-08	6.206e-07	19	1723	ARG2,TSPAN12,EPHX2,GSTP1,HIF1A,IGF1,NAMPT,CASP8,KDR,CCL5,TNF,ATF4,IHH,F2,NOS3,IL6,BDNF,VEGFA,CYBA
114	ctd:D000602	Amino Acids, Peptides, and Proteins	CTD	4.26e-10	7.143e-06	6.211e-08	6.4e-07	6	45	TNF,NOS3,IL6,BDNF,VEGFA,CYBA
115	ctd:C072247	cyclo(Trp-Asp-Pro-Val-Leu)	CTD	4.26e-10	7.143e-06	6.211e-08	6.4e-07	6	45	EPO,ANGPT2,APLN,TNF,IL6,VEGFA
116	CID005329032	ZD4190	Stitch	4.561e-10	7.648e-06	6.593e-08	6.793e-07	5	20	SEMA3A,FLT1,KDR,NOS3,VEGFA
117	ctd:C057693	troglitazone	CTD	4.938e-10	8.279e-06	7.076e-08	7.292e-07	17	1329	EPHX2,GSTP1,FLT1,HIF1A,IGF1,NAMPT,ANGPT2,APLN,CASP8,C3,KDR,CCL5,TNF,NOS3,IL6,VEGFA,CYBA
118	ctd:C029728	4-phenylenediamine	CTD	5.169e-10	8.668e-06	7.345e-08	7.569e-07	7	87	GSTP1,HIF1A,CASP8,CCL5,TNF,IL6,VEGFA
119	ctd:D003630	Daunorubicin	CTD	5.254e-10	8.81e-06	7.403e-08	7.629e-07	9	216	HIF1A,IGF1,ANGPT1,ANGPT2,CASP8,TNF,IL6,VEGFA,CYBA
120	CID000000772	LMWH	Stitch	5.454e-10	9.145e-06	7.578e-08	7.808e-07	13	663	SEMA3A,FLT1,IGF1,HLA-A,KDR,CCL5,TNF,F2,F5,NOS3,IL6,PRL,VEGFA
121	ctd:C068543	1,2-diethyl-3-hydroxypyridin-4-one	CTD	5.553e-10	9.31e-06	7.578e-08	7.808e-07	4	7	EPO,HIF1A,EPAS1,VEGFA
122	ctd:C503983	axitinib	CTD	5.553e-10	9.31e-06	7.578e-08	7.808e-07	4	7	FLT1,KDR,NOS3,VEGFA
123	ctd:C445068	methyl 2-cyano-3,12-dioxoolean-1,9-dien-28-oate	CTD	5.599e-10	9.387e-06	7.578e-08	7.808e-07	6	47	CASP8,CCL5,TNF,IL6,BDNF,VEGFA
124	ctd:D009151	Mustard Gas	CTD	5.604e-10	9.396e-06	7.578e-08	7.808e-07	17	1340	HIF1A,IGF1,CASP8,C3,KDR,CCL5,TNF,ATF4,TEAD4,IHH,ACE,NOS3,IL6,EPAS1,BDNF,LGALS1,VEGFA
125	ctd:D012402	Rotenone	CTD	5.822e-10	9.762e-06	7.81e-08	8.047e-07	15	978	FLT1,HIF1A,IGF1,NAMPT,APLN,CASP8,KDR,TNF,ATF4,NOS3,IL6,EPAS1,BDNF,VEGFA,CYBA
126	ctd:D008627	Mercuric Chloride	CTD	5.963e-10	9.998e-06	7.928e-08	8.17e-07	16	1156	ARG2,EPHX2,GSTP1,EPO,HIF1A,IGF1,ANGPT1,CASP8,C3,CCL5,TNF,ATF4,NOS3,IL6,EPAS1,BDNF
127	CID000024841	iodide	Stitch	6.072e-10	1.018e-05	7.928e-08	8.17e-07	12	534	EPO,FLT1,IGF1,IGF1R,HLA-A,HLA-B,F2,NOS3,PRL,BDNF,LGALS1,VEGFA
128	ctd:D015056	1-Methyl-3-isobutylxanthine	CTD	6.094e-10	1.022e-05	7.928e-08	8.17e-07	11	414	EPHX2,IGF1,NAMPT,IGF1R,ANGPT1,CCL5,TNF,TEAD4,F2,IL6,LGALS1
129	ctd:D004317	Doxorubicin	CTD	6.1e-10	1.023e-05	7.928e-08	8.17e-07	19	1765	EPHX2,GSTP1,EPO,FLT1,HIF1A,IGF1,IGF1R,ANGPT1,CASP8,C3,TNF,ATF4,F2,ACE,NOS3,IL6,PRL,EPAS1,VEGFA
130	ctd:C416282	BAY 11-7085	CTD	6.389e-10	1.071e-05	8.24e-08	8.491e-07	6	48	CASP8,CCL5,TNF,IL6,EPAS1,VEGFA
131	CID000004920	17-isoprogesterone	Stitch	7.104e-10	1.191e-05	9.093e-08	9.37e-07	16	1170	FLT1,HIF1A,IGF1,IGF1R,ANGPT2,C3,KDR,CCL5,TNF,IHH,NOS3,IL6,PRL,BDNF,LGALS1,VEGFA
132	ctd:D028321	Plant Preparations	CTD	7.339e-10	1.231e-05	9.322e-08	9.606e-07	10	315	IGF1,TNF,C5,IHH,F2,NOS3,IL6,BDNF,VEGFA,CYBA
133	ctd:C089730	rosiglitazone	CTD	7.583e-10	1.271e-05	9.559e-08	9.85e-07	18	1571	EPHX2,GSTP1,HIF1A,IGF1,NAMPT,IGF1R,APLN,MTHFR,CCL5,TNF,TEAD4,F2,F5,NOS3,IL6,LGALS1,VEGFA,CYBA
134	CID000025476	Hypertensin II	Stitch	8.86e-10	1.486e-05	1.109e-07	1.142e-06	11	429	ARG2,FLT1,HIF1A,IGF1,ANGPT1,ACE,NOS3,IL6,PRL,LGALS1,CYBA
135	ctd:D037342	Pertussis Toxin	CTD	8.958e-10	1.502e-05	1.113e-07	1.146e-06	7	94	HIF1A,IGF1,TNF,C5,NOS3,IL6,PRL
136	ctd:C032628	tin protoporphyrin IX	CTD	9.332e-10	1.565e-05	1.151e-07	1.186e-06	6	51	CASP8,CCL5,TNF,NOS3,IL6,VEGFA
137	ctd:D006046	Gold	CTD	9.533e-10	1.598e-05	1.167e-07	1.202e-06	11	432	FZD4,IGF1,IGF1R,HLA-B,MTHFR,CASP8,C3,CCL5,TNF,ATF4,IL6
138	ctd:D007545	Isoproterenol	CTD	9.699e-10	1.626e-05	1.178e-07	1.214e-06	15	1015	FLT1,HIF1A,IGF1,IGF1R,ANGPT2,APLN,CASP8,C3,KDR,TNF,NOS3,IL6,PRL,VEGFA,CYBA
139	ctd:C072553	benzyloxycarbonylleucyl-leucyl-leucine aldehyde	CTD	9.993e-10	1.676e-05	1.205e-07	1.242e-06	12	558	EPHX2,GSTP1,HIF1A,CASP8,TNF,ATF4,ACE,NOS3,IL6,EPAS1,LGALS1,VEGFA
140	ctd:C080955	N-(2-cyclohexyloxy-4-nitrophenyl)methanesulfonamide	CTD	1.04e-09	1.744e-05	1.245e-07	1.283e-06	7	96	HIF1A,CASP8,TNF,F2,ACE,IL6,VEGFA
141	CID000003385	5-FU	Stitch	1.083e-09	1.816e-05	1.288e-07	1.328e-06	12	562	SEMA3A,GSTP1,EPO,HIF1A,ANGPT1,MTHFR,CASP8,TNF,IL6,EPAS1,BDNF,VEGFA
142	ctd:D000431	Ethanol	CTD	1.102e-09	1.848e-05	1.301e-07	1.341e-06	18	1608	EPHX2,GSTP1,FLT1,HIF1A,IGF1,IGF1R,SCG3,MALAT1,CASP8,KDR,TNF,ATF4,NOS3,IL6,PRL,BDNF,VEGFA,CYBA
143	ctd:D016729	Leuprolide	CTD	1.243e-09	2.084e-05	1.457e-07	1.502e-06	5	24	IGF1,IGF1R,TNF,IL6,VEGFA
144	ctd:D004008	Diclofenac	CTD	1.271e-09	2.131e-05	1.48e-07	1.525e-06	12	570	FZD4,GSTP1,EPO,HIF1A,IGF1R,HLA-DRB1,CASP8,TNF,ATF4,IL6,EPAS1,VEGFA
145	ctd:D015058	1-Naphthylisothiocyanate	CTD	1.367e-09	2.293e-05	1.576e-07	1.624e-06	14	871	EPHX2,GSTP1,HIF1A,C3,CCL5,TNF,ATF4,C5,F2,F5,IL6,LGALS1,VEGFA,CYBA
146	CID000002541	candesartan	Stitch	1.372e-09	2.301e-05	1.576e-07	1.624e-06	8	162	EPO,ANGPT1,HLA-DRB1,TNF,ACE,NOS3,VEGFA,CYBA
147	ctd:C531249	Poly(amidoamine)	CTD	1.493e-09	2.503e-05	1.703e-07	1.755e-06	6	55	CCL5,TNF,F5,IL6,PRL,BDNF
148	ctd:C028025	protoporphyrin IX	CTD	1.551e-09	2.601e-05	1.734e-07	1.787e-06	5	25	HIF1A,CASP8,TNF,NOS3,EPAS1
149	ctd:D003606	Dacarbazine	CTD	1.551e-09	2.601e-05	1.734e-07	1.787e-06	5	25	EPO,CASP8,TNF,IL6,VEGFA
150	ctd:C432747	1,1-dimethylbutyl-1-deoxy-Delta(9)-THC	CTD	1.551e-09	2.601e-05	1.734e-07	1.787e-06	5	25	HIF1A,ANGPT2,KDR,TNF,VEGFA
151	ctd:D008344	Maneb	CTD	1.669e-09	2.799e-05	1.853e-07	1.91e-06	10	343	GSTP1,IGF1,MTHFR,CASP8,KDR,TNF,NDP,PRL,BDNF,VEGFA
152	ctd:D005047	Etoposide	CTD	1.77e-09	2.969e-05	1.945e-07	2.004e-06	12	587	GSTP1,EPO,HIF1A,IGF1R,HLA-A,HLA-B,CASP8,TNF,ATF4,IL6,BDNF,VEGFA
153	ctd:D007069	Ifosfamide	CTD	1.774e-09	2.975e-05	1.945e-07	2.004e-06	9	248	TSPAN12,GSTP1,HIF1A,HLA-A,HLA-B,TNF,ATF4,IL6,VEGFA
154	ctd:D013481	Superoxides	CTD	1.831e-09	3.07e-05	1.993e-07	2.054e-06	7	104	EPO,IGF1,KDR,TNF,C5,NOS3,CYBA
155	ctd:C032881	lysophosphatidic acid	CTD	1.863e-09	3.124e-05	2.015e-07	2.077e-06	6	57	EPO,HIF1A,TNF,C5,IL6,VEGFA
156	ctd:C001329	helenalin	CTD	1.917e-09	3.215e-05	2.061e-07	2.124e-06	5	26	CASP8,CCL5,TNF,ATF4,IL6
157	ctd:D012431	Rutin	CTD	1.958e-09	3.284e-05	2.092e-07	2.155e-06	7	105	IGF1,IGF1R,CASP8,CCL5,TNF,IL6,VEGFA
158	ctd:D015054	Zymosan	CTD	2.205e-09	3.697e-05	2.34e-07	2.411e-06	8	172	ARG2,EPO,IGF1,C3,TNF,IL6,VEGFA,CYBA
159	CID000004692	C15H20O3	Stitch	2.528e-09	4.238e-05	2.664e-07	2.746e-06	8	175	EPO,HIF1A,MTHFR,CASP8,CCL5,TNF,NOS3,IL6
160	ctd:C002669	parthenolide	CTD	2.558e-09	4.29e-05	2.664e-07	2.746e-06	6	60	CASP8,CCL5,TNF,C5,IL6,VEGFA
161	ctd:D011429	Propolis	CTD	2.558e-09	4.29e-05	2.664e-07	2.746e-06	6	60	HIF1A,IGF1,CASP8,TNF,NOS3,VEGFA
162	ctd:D000171	Acrolein	CTD	2.595e-09	4.352e-05	2.686e-07	2.768e-06	9	259	GSTP1,CASP8,CCL5,TNF,ATF4,MIR223,IL6,BDNF,VEGFA
163	CID000005056	trans-3,4,5-trihydroxystilbene	Stitch	2.629e-09	4.408e-05	2.704e-07	2.787e-06	12	608	GSTP1,FLT1,HIF1A,IGF1,HLA-A,CASP8,KDR,TNF,F2,NOS3,IL6,VEGFA
164	CID006450878	Etiocobalamin	Stitch	2.765e-09	4.636e-05	2.821e-07	2.907e-06	8	177	ANGPT1,HLA-A,HLA-B,C3,TNF,C5,IL6,VEGFA
165	CID000045469	sodium nitroprusside	Stitch	2.776e-09	4.655e-05	2.821e-07	2.907e-06	9	261	ARG2,IGF1,TNF,F2,ACE,NOS3,IL6,VEGFA,CYBA
166	ctd:D017311	Amlodipine	CTD	2.833e-09	4.75e-05	2.862e-07	2.949e-06	6	61	IGF1,CASP8,TNF,ACE,NOS3,CYBA
167	ctd:D008345	Manganese	CTD	2.867e-09	4.808e-05	2.879e-07	2.967e-06	11	480	EPO,HIF1A,NAMPT,ANGPT2,TNF,F2,NOS3,IL6,PRL,BDNF,VEGFA
168	ctd:D009599	Nitroprusside	CTD	2.896e-09	4.855e-05	2.89e-07	2.978e-06	7	111	EPO,HIF1A,IGF1,CASP8,TNF,NOS3,VEGFA
169	CID000004253	morphine hydrochloride	Stitch	2.93e-09	4.913e-05	2.907e-07	2.996e-06	11	481	ARG2,IGF1,CCL5,TNF,F2,NOS3,IL6,PRL,BDNF,LGALS1,VEGFA
170	ctd:C070081	fulvestrant	CTD	3.126e-09	5.242e-05	3.071e-07	3.164e-06	11	484	IGF1,IGF1R,C3,CCL5,TNF,ATF4,IHH,NOS3,IL6,PRL,VEGFA
171	ctd:D004533	Egtazic Acid	CTD	3.132e-09	5.251e-05	3.071e-07	3.164e-06	6	62	IGF1,CCL5,TNF,C5,NOS3,IL6
172	ctd:C027492	Huang Qi	CTD	3.317e-09	5.561e-05	3.233e-07	3.332e-06	4	10	EPO,HIF1A,TNF,IL6
173	CID000176155	SB203580	Stitch	3.383e-09	5.672e-05	3.276e-07	3.376e-06	13	771	HIF1A,IGF1,NAMPT,ANGPT1,CASP8,CCL5,TNF,F2,NOS3,IL6,EPAS1,VEGFA,CYBA
174	ctd:D004054	Diethylstilbestrol	CTD	3.4e-09	5.7e-05	3.276e-07	3.376e-06	16	1304	ARG2,GSTP1,EPO,IGF1,NAMPT,IGF1R,CASP8,C3,KDR,CCL5,TNF,ATF4,IL6,PRL,BDNF,VEGFA
175	ctd:D014222	Triamcinolone Acetonide	CTD	3.446e-09	5.777e-05	3.293e-07	3.393e-06	5	29	CASP8,CCL5,TNF,IL6,VEGFA
176	CID000006371	phosgene	Stitch	3.456e-09	5.795e-05	3.293e-07	3.393e-06	6	63	EPO,FLT1,HIF1A,IGF1,EPAS1,CYBA
177	ctd:C097240	15-deoxy-delta(12,14)-prostaglandin J2	CTD	3.492e-09	5.855e-05	3.308e-07	3.408e-06	7	114	GSTP1,HIF1A,CASP8,CCL5,TNF,NOS3,IL6
178	ctd:C060836	pioglitazone	CTD	3.754e-09	6.294e-05	3.516e-07	3.623e-06	8	184	GSTP1,ANGPT2,CCL5,TNF,ACE,IL6,VEGFA,CYBA
179	CID000024529	nitrite	Stitch	3.754e-09	6.294e-05	3.516e-07	3.623e-06	8	184	ARG2,EPO,APLN,HLA-A,TNF,NOS3,IL6,CYBA
180	ctd:C016766	sulforafan	CTD	3.867e-09	6.483e-05	3.602e-07	3.711e-06	11	494	GSTP1,HIF1A,CASP8,C3,CCL5,TNF,ATF4,SUCNR1,IL6,BDNF,LGALS1
181	CID000123015	AC1L3VO5	Stitch	3.945e-09	6.614e-05	3.634e-07	3.745e-06	7	116	EPO,FLT1,HIF1A,KDR,NOS3,EPAS1,VEGFA
182	ctd:C070379	1,2-bis(2-aminophenoxy)ethane N,N,N',N'-tetraacetic acid acetoxymethyl ester	CTD	3.945e-09	6.614e-05	3.634e-07	3.745e-06	7	116	CASP8,KDR,TNF,NOS3,IL6,BDNF,VEGFA
183	ctd:D003345	Corticosterone	CTD	3.981e-09	6.675e-05	3.648e-07	3.759e-06	9	272	FLT1,IGF1,IGF1R,C3,KDR,ACE,PRL,BDNF,VEGFA
184	CID000006035	bromodeoxyuridine	Stitch	4.028e-09	6.754e-05	3.662e-07	3.774e-06	10	376	FLT1,IGF1,IGF1R,TNF,F5,IL6,PRL,EPAS1,BDNF,VEGFA
185	CID000005376	AC1L1K7T	Stitch	4.058e-09	6.803e-05	3.662e-07	3.774e-06	12	632	GSTP1,FLT1,IGF1,IGF1R,CASP8,C3,KDR,NOS3,IL6,PRL,BDNF,VEGFA
186	CID000004894	AC1L1J6W	Stitch	4.087e-09	6.853e-05	3.662e-07	3.774e-06	8	186	SEMA3A,EPO,FLT1,IGF1,TNF,NOS3,IL6,PRL
187	ctd:D003676	Deferoxamine	CTD	4.087e-09	6.853e-05	3.662e-07	3.774e-06	8	186	EPO,HIF1A,CASP8,TNF,C5,IL6,EPAS1,VEGFA
188	CID000002662	celecoxib	Stitch	4.111e-09	6.893e-05	3.662e-07	3.774e-06	9	273	GSTP1,IGF1,ANGPT1,ANGPT2,CASP8,CCL5,TNF,IL6,VEGFA
189	ctd:D010168	Palmitates	CTD	4.128e-09	6.922e-05	3.662e-07	3.774e-06	5	30	EPHX2,NAMPT,TNF,NOS3,IL6
190	ctd:C016837	zinc chloride	CTD	4.238e-09	7.106e-05	3.74e-07	3.854e-06	10	378	ARG2,GSTP1,EPO,HIF1A,C3,TNF,ATF4,MIR223,IL6,VEGFA
191	CID000003339	fenofibrate	Stitch	4.522e-09	7.582e-05	3.969e-07	4.09e-06	9	276	EPHX2,IGF1,NAMPT,HLA-A,C3,CCL5,TNF,NOS3,IL6
192	ctd:D003035	Cobalt	CTD	4.667e-09	7.824e-05	4.075e-07	4.199e-06	9	277	EPO,HIF1A,IGF1,CCL5,TNF,F2,IL6,EPAS1,VEGFA
193	ctd:C004479	pimagedine	CTD	5.045e-09	8.459e-05	4.383e-07	4.516e-06	6	67	HIF1A,TNF,ACE,NOS3,IL6,CYBA
194	CID000002146	aminoguanidine	Stitch	5.301e-09	8.888e-05	4.558e-07	4.697e-06	7	121	ARG2,IGF1,HLA-A,TNF,NOS3,IL6,VEGFA
195	CID006327189	boron monoxide	Stitch	5.301e-09	8.888e-05	4.558e-07	4.697e-06	7	121	SEMA3A,FLT1,IGF1,IGF1R,IL6,PRL,VEGFA
196	CID003083715	angiotensin	Stitch	5.453e-09	9.143e-05	4.651e-07	4.793e-06	9	282	EPO,APLN,MTHFR,SUCNR1,ACE,NOS3,IL6,VEGFA,CYBA
197	ctd:D000255	Adenosine Triphosphate	CTD	5.465e-09	9.163e-05	4.651e-07	4.793e-06	8	193	GSTP1,HIF1A,CASP8,KDR,TNF,F2,NOS3,IL6
198	ctd:C037032	galangin	CTD	5.525e-09	9.263e-05	4.678e-07	4.821e-06	6	68	GSTP1,HIF1A,TNF,IL6,EPAS1,VEGFA
199	CID000054454	simvastatin	Stitch	5.711e-09	9.575e-05	4.794e-07	4.94e-06	10	390	IGF1,IGF1R,CCL5,TNF,F2,ACE,NOS3,IL6,VEGFA,CYBA
200	ctd:D004785	Environmental Pollutants	CTD	5.719e-09	9.588e-05	4.794e-07	4.94e-06	11	513	ARG2,GSTP1,FLT1,IGF1,NAMPT,CCL5,TNF,F2,IL6,PRL,BDNF
201	ctd:C027955	aflatoxin G1	CTD	5.816e-09	9.751e-05	4.827e-07	4.974e-06	5	32	HLA-A,HLA-B,TNF,IL6,VEGFA
202	ctd:D007200	Indican	CTD	5.816e-09	9.751e-05	4.827e-07	4.974e-06	5	32	EPO,HIF1A,ACE,IL6,EPAS1
203	ctd:D015237	Dinoprost	CTD	5.944e-09	9.967e-05	4.91e-07	5.059e-06	7	123	ANGPT2,CASP8,TNF,ACE,NOS3,PRL,VEGFA
204	CID000004196	AC1L1HMM	Stitch	6.074e-09	0.0001018	4.993e-07	5.145e-06	11	516	FZD4,IGF1,IGF1R,ANGPT1,C3,TNF,ACE,NOS3,IL6,PRL,VEGFA
205	CID000002162	amlodipine	Stitch	7.034e-09	0.0001179	5.725e-07	5.899e-06	7	126	TNF,ATF4,F2,ACE,NOS3,IL6,VEGFA
206	CID000003222	CAS 76095-16-4	Stitch	7.034e-09	0.0001179	5.725e-07	5.899e-06	7	126	EPO,IGF1,TNF,ACE,F5,NOS3,PRL
207	ctd:D020122	tert-Butylhydroperoxide	CTD	7.096e-09	0.000119	5.748e-07	5.923e-06	18	1808	ARG2,EPHX2,GSTP1,HIF1A,IGF1,IGF1R,NAA15,HLA-B,C3,CCL5,TNF,C5,TEAD4,F2,IL6,BDNF,VEGFA,CYBA
208	ctd:C001803	tempol	CTD	7.196e-09	0.0001206	5.8e-07	5.977e-06	6	71	HIF1A,TNF,NOS3,IL6,EPAS1,CYBA
209	ctd:C016310	cobra venom factor	CTD	7.794e-09	0.0001307	6.238e-07	6.428e-06	4	12	C3,TNF,C5,IL6
210	CID000003934	15-epi-lipoxin A4	Stitch	7.85e-09	0.0001316	6.238e-07	6.428e-06	7	128	IGF1,IGF1R,CCL5,TNF,C5,F2,IL6
211	ctd:D004964	Estriol	CTD	7.85e-09	0.0001316	6.238e-07	6.428e-06	7	128	IGF1,NAMPT,TNF,NOS3,IL6,PRL,VEGFA
212	ctd:C491689	cobalt-nickel-chromium-molybdenum alloy	CTD	8.261e-09	0.0001385	6.534e-07	6.733e-06	3	3	HIF1A,TNF,VEGFA
213	ctd:D002248	Carbon Monoxide	CTD	8.526e-09	0.000143	6.712e-07	6.916e-06	6	73	EPO,CASP8,TNF,NOS3,IL6,BDNF
214	CID000151069	AC1L45LU	Stitch	8.769e-09	0.000147	6.871e-07	7.08e-06	8	205	FLT1,HIF1A,IGF1R,CASP8,KDR,NOS3,IL6,VEGFA
215	ctd:D001241	Aspirin	CTD	8.883e-09	0.0001489	6.927e-07	7.138e-06	12	678	EPHX2,NAA15,HLA-DRB1,CASP8,TNF,ATF4,F2,ACE,NOS3,IL6,VEGFA,CYBA
216	CID000004510	nitroglycerin	Stitch	9.109e-09	0.0001527	7.071e-07	7.286e-06	8	206	GSTP1,EPO,MTHFR,TNF,ACE,F5,NOS3,IL6
217	ctd:C070515	bisindolylmaleimide I	CTD	9.226e-09	0.0001547	7.125e-07	7.342e-06	7	131	GSTP1,HIF1A,KDR,TNF,ACE,IL6,VEGFA
218	ctd:C081643	candesartan	CTD	9.264e-09	0.0001553	7.125e-07	7.342e-06	6	74	TNF,ACE,NOS3,IL6,VEGFA,CYBA
219	ctd:D000001	Calcimycin	CTD	9.727e-09	0.0001631	7.447e-07	7.674e-06	7	132	CASP8,CCL5,TNF,NOS3,IL6,PRL,VEGFA
220	ctd:D003633	Dichlorodiphenyl Dichloroethylene	CTD	9.887e-09	0.0001658	7.512e-07	7.741e-06	9	302	IGF1,IGF1R,CASP8,TNF,NOS3,IL6,PRL,BDNF,CYBA
221	CID000005428	AC1L1KC5	Stitch	9.901e-09	0.000166	7.512e-07	7.741e-06	11	541	HIF1A,IGF1,HLA-B,CASP8,TNF,ATF4,F2,NOS3,IL6,BDNF,VEGFA
222	CID003015678	CoCl2	Stitch	1.005e-08	0.0001686	7.56e-07	7.79e-06	6	75	GSTP1,EPO,HIF1A,KDR,ATF4,VEGFA
223	ctd:D000537	Aluminum Oxide	CTD	1.005e-08	0.0001686	7.56e-07	7.79e-06	6	75	FLT1,IGF1,C3,TNF,IL6,VEGFA
224	ctd:D005620	Freund's Adjuvant	CTD	1.02e-08	0.000171	7.635e-07	7.867e-06	8	209	IGF1,CASP8,C3,CCL5,TNF,NOS3,IL6,VEGFA
225	CID000102547	DC18PE	Stitch	1.09e-08	0.0001827	8.122e-07	8.369e-06	6	76	EPHX2,GSTP1,FLT1,HIF1A,MTHFR,F5
226	CID000000160	prostaglandin F2	Stitch	1.108e-08	0.0001858	8.221e-07	8.471e-06	9	306	EPO,IGF1,TNF,NOS3,IL6,PRL,LGALS1,VEGFA,CYBA
227	ctd:D008731	Methoxychlor	CTD	1.13e-08	0.0001895	8.349e-07	8.603e-06	11	548	IGF1,IGF1R,ANGPT1,CASP8,C3,KDR,TNF,ACE,IL6,PRL,VEGFA
228	ctd:C023035	3,4,5,3',4'-pentachlorobiphenyl	CTD	1.189e-08	0.0001994	8.746e-07	9.012e-06	15	1221	FZD4,EPHX2,FLT1,HIF1A,IGF1,NAMPT,IGF1R,APLN,C3,KDR,TNF,NOS3,IL6,EPAS1,VEGFA
229	ctd:D005944	Glucosamine	CTD	1.24e-08	0.0002079	9.078e-07	9.354e-06	9	310	HIF1A,CCL5,TNF,NOS3,IL6,EPAS1,BDNF,VEGFA,CYBA
230	ctd:D014527	Uric Acid	CTD	1.277e-08	0.000214	9.306e-07	9.59e-06	6	78	IGF1R,TNF,ATF4,NOS3,VEGFA,CYBA
231	CID005282055	C12063	Stitch	1.412e-08	0.0002368	1.021e-06	1.052e-05	10	429	IGF1R,HLA-B,SCG3,CASP8,TNF,ATF4,F2,ACE,IL6,VEGFA
232	CID000000774	histamine	Stitch	1.412e-08	0.0002368	1.021e-06	1.052e-05	11	560	GSTP1,IGF1,KDR,CCL5,TNF,IHH,ACE,NOS3,IL6,PRL,VEGFA
233	ctd:D005576	Colforsin	CTD	1.424e-08	0.0002387	1.025e-06	1.056e-05	9	315	IGF1,CCL5,TNF,F2,NOS3,IL6,PRL,BDNF,VEGFA
234	CID000002460	dibutyryl cyclic 3',5'-AMP	Stitch	1.438e-08	0.0002412	1.03e-06	1.061e-05	11	561	ARG2,IGF1,TNF,F2,ACE,NOS3,IL6,PRL,BDNF,LGALS1,VEGFA
235	CID000005291	imatinib	Stitch	1.444e-08	0.0002421	1.03e-06	1.061e-05	10	430	EPO,FLT1,HIF1A,IGF1,IGF1R,CASP8,KDR,TNF,BDNF,VEGFA
236	CID000036811	dobutamine	Stitch	1.464e-08	0.0002455	1.04e-06	1.072e-05	7	140	EPO,IGF1,IGF1R,CASP8,TNF,ACE,IL6
237	ctd:D002746	Chlorpromazine	CTD	1.519e-08	0.0002548	1.075e-06	1.108e-05	11	564	GSTP1,HIF1A,NAMPT,C3,TNF,ATF4,F2,IL6,PRL,BDNF,VEGFA
238	ctd:D003687	Dehydroepiandrosterone	CTD	1.538e-08	0.0002579	1.084e-06	1.117e-05	7	141	EPO,TNF,C5,NOS3,IL6,PRL,CYBA
239	ctd:C069346	fascaplysine	CTD	1.571e-08	0.0002635	1.102e-06	1.136e-05	4	14	FLT1,HIF1A,KDR,NOS3
240	ctd:D003078	Colchicine	CTD	1.633e-08	0.0002739	1.14e-06	1.175e-05	8	222	APLN,CASP8,C3,TNF,F2,ACE,IL6,BDNF
241	ctd:C022990	chromic chloride	CTD	1.645e-08	0.0002758	1.14e-06	1.175e-05	5	39	IGF1,LRP5,CASP8,TNF,IL6
242	CID000003285	ethylnylestradiol	Stitch	1.646e-08	0.0002759	1.14e-06	1.175e-05	15	1251	IGF1,IGF1R,SCG3,LRP5,C3,TNF,F2,ACE,F5,NOS3,IL6,PRL,BDNF,LGALS1,VEGFA
243	ctd:D010047	Ovalbumin	CTD	1.73e-08	0.00029	1.193e-06	1.23e-05	6	82	HIF1A,CCL5,TNF,C5,IL6,VEGFA
244	CID000002116	vitamin E	Stitch	1.833e-08	0.0003074	1.26e-06	1.298e-05	10	441	GSTP1,EPO,HIF1A,LRP5,TNF,NOS3,IL6,PRL,VEGFA,CYBA
245	CID000001361	AC1L1BB2	Stitch	1.861e-08	0.0003121	1.274e-06	1.313e-05	6	83	ARG2,EPO,HIF1A,F5,IL6,PRL
246	CID000161656	PAN copolymer	Stitch	1.877e-08	0.0003147	1.274e-06	1.313e-05	5	40	EPO,TNF,F2,ACE,IL6
247	ctd:D000875	Anthralin	CTD	1.877e-08	0.0003147	1.274e-06	1.313e-05	5	40	GSTP1,CASP8,TNF,IL6,VEGFA
248	CID000024288	cobalt(II) chloride	Stitch	1.958e-08	0.0003284	1.319e-06	1.359e-05	7	146	GSTP1,EPO,FLT1,HIF1A,EPAS1,VEGFA,CYBA
249	ctd:C005274	naringin	CTD	1.958e-08	0.0003284	1.319e-06	1.359e-05	7	146	GSTP1,IGF1,ANGPT1,CCL5,TNF,IL6,CYBA
250	ctd:C044946	benazepril	CTD	2.002e-08	0.0003356	1.337e-06	1.378e-05	6	84	MTHFR,CCL5,TNF,ACE,IL6,VEGFA
251	ctd:C097284	manganese(III)-tetrakis(4-benzoic acid)porphyrin	CTD	2.002e-08	0.0003356	1.337e-06	1.378e-05	6	84	HIF1A,CASP8,TNF,IL6,VEGFA,CYBA
252	ctd:D002784	Cholesterol	CTD	2.01e-08	0.000337	1.337e-06	1.378e-05	8	228	FLT1,HIF1A,IGF1,CASP8,TNF,NOS3,IL6,VEGFA
253	ctd:D018021	Lithium Chloride	CTD	2.018e-08	0.0003384	1.337e-06	1.378e-05	9	328	FZD4,IGF1,MALAT1,KDR,TNF,ATF4,F5,IL6,VEGFA
254	ctd:D005054	Eugenol	CTD	2.08e-08	0.0003487	1.369e-06	1.411e-05	8	229	GSTP1,FLT1,HIF1A,NAMPT,HLA-B,TNF,IL6,BDNF
255	ctd:D009020	Morphine	CTD	2.083e-08	0.0003492	1.369e-06	1.411e-05	10	447	ARG2,EPHX2,CASP8,CCL5,TNF,F2,IL6,PRL,BDNF,VEGFA
256	CID000005305	AC1L1K22	Stitch	2.135e-08	0.0003579	1.39e-06	1.433e-05	5	41	EPO,FLT1,HIF1A,IGF1R,NOS3
257	ctd:C415032	picropodophyllin	CTD	2.14e-08	0.0003587	1.39e-06	1.433e-05	4	15	IGF1,IGF1R,TNF,IL6
258	CID006918569	NVP-AAD777	Stitch	2.14e-08	0.0003587	1.39e-06	1.433e-05	4	15	FLT1,KDR,NOS3,VEGFA
259	CID000000943	nitrate	Stitch	2.183e-08	0.000366	1.413e-06	1.456e-05	9	331	ARG2,APLN,C3,TNF,ACE,NOS3,IL6,VEGFA,CYBA
260	ctd:C016340	o,p'-DDT	CTD	2.218e-08	0.0003719	1.43e-06	1.474e-05	10	450	TSPAN12,IGF1,CASP8,C3,TNF,ATF4,IL6,PRL,VEGFA,CYBA
261	ctd:C471405	sorafenib	CTD	2.254e-08	0.000378	1.448e-06	1.492e-05	7	149	FLT1,HIF1A,IGF1,IGF1R,CASP8,KDR,ATF4
262	ctd:D019287	Zinc Sulfate	CTD	2.304e-08	0.0003864	1.469e-06	1.514e-05	12	739	FLT1,IGF1,IGF1R,SCG3,CASP8,C3,KDR,TNF,ACE,IL6,BDNF,VEGFA
263	ctd:D013759	Dronabinol	CTD	2.308e-08	0.0003869	1.469e-06	1.514e-05	13	906	IGF1,NAMPT,IGF1R,NAA15,MALAT1,CASP8,KDR,TNF,ATF4,IL6,PRL,BDNF,VEGFA
264	ctd:D059808	Polyphenols	CTD	2.313e-08	0.0003878	1.469e-06	1.514e-05	10	452	GSTP1,HIF1A,APLN,SCG3,CASP8,C3,TNF,IL6,VEGFA,CYBA
265	CID000001287	AC1L1B55	Stitch	2.411e-08	0.0004043	1.519e-06	1.566e-05	10	454	GSTP1,FLT1,HIF1A,CASP8,KDR,TNF,F2,NOS3,IL6,VEGFA
266	ctd:C447082	tricarbonyldichlororuthenium (II) dimer	CTD	2.419e-08	0.0004056	1.519e-06	1.566e-05	5	42	HIF1A,TNF,F2,IL6,VEGFA
267	ctd:D006852	Hydrochlorothiazide	CTD	2.419e-08	0.0004056	1.519e-06	1.566e-05	5	42	FLT1,HLA-DRB1,ACE,NOS3,CYBA
268	CID000001573	2-methoxyestradiol	Stitch	2.628e-08	0.0004406	1.644e-06	1.694e-05	8	236	GSTP1,FLT1,HIF1A,CASP8,TNF,F5,LGALS1,VEGFA
269	CID000023976	chromium	Stitch	2.68e-08	0.0004494	1.671e-06	1.722e-05	9	339	HIF1A,HLA-A,HLA-B,C3,TNF,F5,NOS3,IL6,VEGFA
270	ctd:D002809	Chondroitin Sulfates	CTD	2.733e-08	0.0004583	1.691e-06	1.743e-05	5	43	C3,TNF,C5,BDNF,VEGFA
271	ctd:D000640	Amitrole	CTD	2.733e-08	0.0004583	1.691e-06	1.743e-05	5	43	EPO,TNF,ACE,IL6,VEGFA
272	ctd:C017154	cyanidin	CTD	2.848e-08	0.0004776	1.743e-06	1.796e-05	4	16	TNF,NOS3,IL6,VEGFA
273	ctd:C464745	norisoboldine	CTD	2.848e-08	0.0004776	1.743e-06	1.796e-05	4	16	HIF1A,TNF,IL6,VEGFA
274	ctd:C524106	4-(4-(3-adamantan-1-ylureido)cyclohexyloxy)benzoic acid	CTD	2.848e-08	0.0004776	1.743e-06	1.796e-05	4	16	EPHX2,TNF,NOS3,IL6
275	ctd:D014051	Toluene 2,4-Diisocyanate	CTD	2.961e-08	0.0004965	1.801e-06	1.856e-05	7	155	GSTP1,CCL5,TNF,NDP,NOS3,IL6,VEGFA
276	CID000002973	deferoxamine	Stitch	2.965e-08	0.0004971	1.801e-06	1.856e-05	9	343	EPO,HIF1A,CASP8,TNF,ATF4,IL6,EPAS1,VEGFA,CYBA
277	ctd:C419410	N-(N-(3,5-difluorophenacetyl)alanyl)phenylglycine tert-butyl ester	CTD	3.079e-08	0.0005163	1.864e-06	1.921e-05	5	44	FLT1,HIF1A,TNF,IL6,VEGFA
278	CID000158781	olmesartan	Stitch	3.247e-08	0.0005444	1.958e-06	2.018e-05	6	91	HIF1A,TNF,ACE,NOS3,IL6,CYBA
279	ctd:C464966	VX-745	CTD	3.293e-08	0.0005522	1.965e-06	2.025e-05	3	4	TNF,IL6,VEGFA
280	ctd:C010953	exochelins	CTD	3.293e-08	0.0005522	1.965e-06	2.025e-05	3	4	HIF1A,EPAS1,VEGFA
281	ctd:C001598	chetomin	CTD	3.293e-08	0.0005522	1.965e-06	2.025e-05	3	4	HIF1A,TNF,VEGFA
282	CID000014801	MnO2	Stitch	3.38e-08	0.0005667	2.01e-06	2.071e-05	7	158	GSTP1,IGF1,ANGPT2,TNF,NOS3,IL6,CYBA
283	ctd:D012980	Sodium Salicylate	CTD	3.459e-08	0.0005799	2.049e-06	2.112e-05	5	45	IGF1,CASP8,TNF,NOS3,IL6
284	CID000000689	AC1Q6S3U	Stitch	3.53e-08	0.0005919	2.084e-06	2.148e-05	7	159	HIF1A,NAMPT,CASP8,TNF,IL6,PRL,VEGFA
285	CID000004112	NSC 117356	Stitch	3.625e-08	0.0006077	2.125e-06	2.19e-05	8	246	GSTP1,HLA-A,MTHFR,CASP8,TNF,NOS3,IL6,PRL
286	ctd:D008094	Lithium	CTD	3.625e-08	0.0006077	2.125e-06	2.19e-05	8	246	ARG2,GSTP1,CASP8,TNF,IL6,PRL,BDNF,VEGFA
287	ctd:C114369	7,8-diacetoxy-4-methylcoumarin	CTD	3.719e-08	0.0006236	2.165e-06	2.231e-05	4	17	TNF,NOS3,IL6,VEGFA
288	ctd:D005000	Ethionamide	CTD	3.719e-08	0.0006236	2.165e-06	2.231e-05	4	17	CCL5,TNF,IL6,VEGFA
289	ctd:C012526	quercitrin	CTD	3.74e-08	0.0006271	2.17e-06	2.236e-05	8	247	FZD4,GSTP1,IGF1R,HLA-A,CASP8,KDR,TNF,EPAS1
290	ctd:D004077	Digoxin	CTD	3.874e-08	0.0006496	2.24e-06	2.308e-05	5	46	HIF1A,CCL5,TNF,NOS3,VEGFA
291	ctd:D012293	Rifampin	CTD	4.079e-08	0.0006839	2.35e-06	2.422e-05	9	356	GSTP1,HIF1A,CASP8,CCL5,TNF,ATF4,IL6,EPAS1,VEGFA
292	ctd:D011345	Fenofibrate	CTD	4.269e-08	0.0007157	2.451e-06	2.526e-05	11	624	EPHX2,GSTP1,HIF1A,NAMPT,CCL5,TNF,ATF4,F2,NOS3,IL6,LGALS1
293	ctd:C028031	cadmium acetate	CTD	4.369e-08	0.0007325	2.5e-06	2.576e-05	7	164	EPHX2,HLA-B,CASP8,KDR,TNF,IL6,VEGFA
294	ctd:D015118	Eicosapentaenoic Acid	CTD	4.481e-08	0.0007513	2.547e-06	2.624e-05	6	96	GSTP1,APLN,CCL5,TNF,IL6,CYBA
295	CID004345065	GHRP-6	Stitch	4.481e-08	0.0007513	2.547e-06	2.624e-05	6	96	FLT1,IGF1,KDR,TNF,IL6,PRL
296	CID000000946	nitrite ion	Stitch	4.503e-08	0.000755	2.551e-06	2.628e-05	8	253	ARG2,TSPAN12,TNF,F2,ACE,NOS3,IL6,CYBA
297	CID000008515	SP600125	Stitch	4.706e-08	0.000789	2.657e-06	2.737e-05	9	362	HIF1A,IGF1,CASP8,CCL5,TNF,NOS3,IL6,PRL,CYBA
298	ctd:C017690	fenvalerate	CTD	4.769e-08	0.0007996	2.669e-06	2.75e-05	6	97	EPHX2,IGF1,C3,ACE,BDNF,VEGFA
299	ctd:C524478	1,3-bis(4-hydroxyphenyl)-4-methyl-5-(4-(2-piperidinylethoxy)phenol)-1H-pyrazole	CTD	4.775e-08	0.0008006	2.669e-06	2.75e-05	4	18	TNF,NOS3,IL6,PRL
300	CID000164475	AC1L4UUJ	Stitch	4.775e-08	0.0008006	2.669e-06	2.75e-05	4	18	FLT1,ANGPT1,KDR,NOS3
301	ctd:D004967	Estrogens	CTD	4.818e-08	0.0008078	2.684e-06	2.766e-05	9	363	IGF1,IGF1R,TNF,F2,NOS3,IL6,PRL,BDNF,VEGFA
302	CID000002520	verapamil	Stitch	4.936e-08	0.0008277	2.738e-06	2.822e-05	10	490	GSTP1,EPO,IGF1,TNF,F2,ACE,NOS3,IL6,PRL,VEGFA
303	ctd:D006854	Hydrocortisone	CTD	4.949e-08	0.0008297	2.738e-06	2.822e-05	7	167	EPO,HIF1A,TNF,IL6,PRL,BDNF,VEGFA
304	ctd:C033607	puerarin	CTD	5.072e-08	0.0008505	2.798e-06	2.883e-05	6	98	IGF1,CASP8,TNF,NOS3,IL6,VEGFA
305	ctd:C020711	beryllium sulfate	CTD	5.365e-08	0.0008996	2.943e-06	3.032e-05	5	49	HLA-A,HLA-DRB1,CCL5,TNF,IL6
306	CID000002076	AC1L1CV3	Stitch	5.37e-08	0.0009004	2.943e-06	3.032e-05	7	169	HIF1A,IGF1,CASP8,CCL5,IHH,NOS3,IL6
307	ctd:D004229	Dithiothreitol	CTD	5.391e-08	0.0009039	2.944e-06	3.034e-05	6	99	HIF1A,CASP8,TNF,ATF4,NOS3,IL6
308	CID000067050	rhodizonic acid	Stitch	5.592e-08	0.0009376	3.044e-06	3.137e-05	7	170	EPO,IGF1,HLA-A,HLA-B,TNF,F2,IL6
309	ctd:D009638	Norepinephrine	CTD	5.822e-08	0.0009762	3.159e-06	3.255e-05	7	171	EPO,IGF1,CASP8,CCL5,TNF,IL6,VEGFA
310	CID000003821	ketamine	Stitch	5.897e-08	0.0009887	3.189e-06	3.287e-05	8	262	TNF,F2,ACE,F5,NOS3,IL6,PRL,BDNF
311	CID000050981	pimonidazole	Stitch	5.952e-08	0.000998	3.209e-06	3.307e-05	5	50	EPO,FLT1,HIF1A,EPAS1,VEGFA
312	CID006437354	satratoxin G	Stitch	6.039e-08	0.001013	3.235e-06	3.333e-05	4	19	HLA-B,CASP8,TNF,IL6
313	ctd:C116890	Semaxinib	CTD	6.039e-08	0.001013	3.235e-06	3.333e-05	4	19	HIF1A,KDR,NOS3,VEGFA
314	CID000104806	peroxynitrite	Stitch	6.077e-08	0.001019	3.236e-06	3.334e-05	9	373	ARG2,HLA-A,CCL5,TNF,F2,NOS3,BDNF,VEGFA,CYBA
315	ctd:C108830	Y 27632	CTD	6.079e-08	0.001019	3.236e-06	3.334e-05	6	101	HIF1A,CASP8,TNF,F2,NOS3,IL6
316	CID000001959	AC1Q5THZ	Stitch	6.189e-08	0.001038	3.284e-06	3.384e-05	10	502	HIF1A,IGF1,TNF,F2,ACE,NOS3,IL6,PRL,BDNF,VEGFA
317	ctd:D013148	Spironolactone	CTD	6.449e-08	0.001081	3.39e-06	3.493e-05	6	102	HIF1A,CASP8,TNF,ACE,IL6,VEGFA
318	ctd:C031143	AICA ribonucleotide	CTD	6.449e-08	0.001081	3.39e-06	3.493e-05	6	102	IGF1,APLN,TNF,NOS3,IL6,CYBA
319	ctd:C457499	2-chloro-5-nitrobenzanilide	CTD	6.449e-08	0.001081	3.39e-06	3.493e-05	6	102	NAMPT,APLN,TNF,NOS3,IL6,VEGFA
320	CID000104795	5'-N-ethylcarboxamidoadenosine	Stitch	6.559e-08	0.0011	3.431e-06	3.535e-05	7	174	HIF1A,HLA-A,TNF,SUCNR1,F2,IL6,VEGFA
321	CID006440511	AC1O5TPK	Stitch	6.589e-08	0.001105	3.431e-06	3.535e-05	5	51	IGF1,IGF1R,CASP8,TNF,VEGFA
322	CID000005042	rebamipide	Stitch	6.589e-08	0.001105	3.431e-06	3.535e-05	5	51	HIF1A,CCL5,TNF,IL6,CYBA
323	ctd:D011070	Poly I-C	CTD	7.244e-08	0.001215	3.749e-06	3.863e-05	6	104	IGF1,CASP8,CCL5,TNF,IL6,BDNF
324	ctd:D007530	Isoflurane	CTD	7.244e-08	0.001215	3.749e-06	3.863e-05	6	104	IGF1,IGF1R,CASP8,TNF,NOS3,IL6
325	ctd:D019782	Riluzole	CTD	7.537e-08	0.001264	3.876e-06	3.994e-05	4	20	CASP8,TNF,IL6,VEGFA
326	ctd:D003613	Danazol	CTD	7.537e-08	0.001264	3.876e-06	3.994e-05	4	20	C3,TNF,IL6,PRL
327	CID000104741	ICI 182,780	Stitch	7.868e-08	0.001319	4.034e-06	4.157e-05	8	272	IGF1,IGF1R,CASP8,C3,NOS3,IL6,PRL,VEGFA
328	ctd:D010672	Phenytoin	CTD	7.959e-08	0.001334	4.069e-06	4.192e-05	9	385	EPHX2,IGF1,HLA-B,KDR,TNF,IHH,F2,IL6,PRL
329	ctd:C005466	ursolic acid	CTD	8.024e-08	0.001345	4.09e-06	4.214e-05	5	53	CASP8,TNF,NOS3,IL6,VEGFA
330	ctd:C014182	salicylsalicylic acid	CTD	8.221e-08	0.001378	4.152e-06	4.278e-05	3	5	NOS3,IL6,VEGFA
331	ctd:C502355	NVP ADW742	CTD	8.221e-08	0.001378	4.152e-06	4.278e-05	3	5	IGF1,IGF1R,VEGFA
332	ctd:C025945	cloricromen	CTD	8.221e-08	0.001378	4.152e-06	4.278e-05	3	5	TNF,NOS3,VEGFA
333	ctd:D015084	2,4-Dichlorophenoxyacetic Acid	CTD	8.588e-08	0.00144	4.324e-06	4.456e-05	6	107	EPHX2,TNF,F2,IL6,PRL,VEGFA
334	ctd:D015025	Zearalenone	CTD	8.69e-08	0.001457	4.35e-06	4.482e-05	9	389	TSPAN12,IGF1,APLN,C3,TNF,IL6,BDNF,LGALS1,VEGFA
335	ctd:D017258	Medroxyprogesterone Acetate	CTD	8.69e-08	0.001457	4.35e-06	4.482e-05	9	389	SEMA3A,C3,KDR,TNF,F2,NOS3,IL6,PRL,VEGFA
336	CID006419741	I gr	Stitch	8.83e-08	0.00148	4.38e-06	4.513e-05	5	54	GSTP1,IGF1,NAMPT,IGF1R,CASP8
337	ctd:C003001	7-ketocholesterol	CTD	8.83e-08	0.00148	4.38e-06	4.513e-05	5	54	CASP8,CCL5,TNF,IL6,VEGFA
338	CID000060791	AC1L1TXN	Stitch	8.83e-08	0.00148	4.38e-06	4.513e-05	5	54	FLT1,ANGPT1,ANGPT2,KDR,VEGFA
339	CID000061492	cobalt-60	Stitch	8.882e-08	0.001489	4.393e-06	4.527e-05	9	390	ARG2,EPO,FLT1,HIF1A,IGF1,KDR,TNF,NOS3,VEGFA
340	CID000000702	ethanol	Stitch	8.998e-08	0.001509	4.437e-06	4.572e-05	12	837	GSTP1,IGF1,CASP8,KDR,TNF,F2,ACE,NOS3,IL6,PRL,BDNF,VEGFA
341	CID000002019	Actinomycin D	Stitch	9.068e-08	0.00152	4.438e-06	4.573e-05	10	523	EPO,FLT1,IGF1,CASP8,TNF,F2,NOS3,IL6,PRL,VEGFA
342	CID000014809	zinc superoxide	Stitch	9.079e-08	0.001522	4.438e-06	4.573e-05	6	108	EPO,HIF1A,TNF,C5,NOS3,EPAS1
343	ctd:C030419	andrographolide	CTD	9.079e-08	0.001522	4.438e-06	4.573e-05	6	108	FLT1,HIF1A,CASP8,KDR,TNF,VEGFA
344	ctd:D000069286	Bortezomib	CTD	9.115e-08	0.001528	4.443e-06	4.578e-05	12	838	EPO,HIF1A,IGF1R,MALAT1,CASP8,KDR,TNF,ATF4,ACE,IL6,VEGFA,CYBA
345	ctd:D019855	Ethylene Glycol	CTD	9.296e-08	0.001559	4.505e-06	4.642e-05	4	21	CCL5,TNF,C5,IL6
346	ctd:C007619	eriodictyol	CTD	9.296e-08	0.001559	4.505e-06	4.642e-05	4	21	GSTP1,TNF,IL6,VEGFA
347	ctd:D000068876	Fingolimod Hydrochloride	CTD	9.698e-08	0.001626	4.686e-06	4.829e-05	5	55	CASP8,TNF,IL6,BDNF,VEGFA
348	ctd:C040048	caffeic acid	CTD	1.013e-07	0.001699	4.867e-06	5.016e-05	6	110	GSTP1,TNF,NDP,NOS3,IL6,VEGFA
349	CID000006451	bromcresol green	Stitch	1.013e-07	0.001699	4.867e-06	5.016e-05	6	110	IGF1,HLA-A,HLA-B,TNF,NOS3,IL6
350	CID000002214	apocynin	Stitch	1.035e-07	0.001736	4.959e-06	5.11e-05	7	186	HIF1A,IGF1,TNF,ACE,NOS3,VEGFA,CYBA
351	ctd:C055162	clopidogrel	CTD	1.063e-07	0.001783	5.079e-06	5.233e-05	5	56	CCL5,TNF,F2,IL6,BDNF
352	ctd:D008748	Methylcholanthrene	CTD	1.07e-07	0.001794	5.097e-06	5.252e-05	13	1033	EPHX2,GSTP1,HIF1A,MALAT1,C3,CCL5,TNF,TEAD4,F2,IL6,EPAS1,LGALS1,VEGFA
353	CID000003403	CAS 93957-55-2	Stitch	1.074e-07	0.001801	5.101e-06	5.256e-05	7	187	IGF1R,TNF,F2,ACE,NOS3,IL6,CYBA
354	ctd:C440499	lipopolysaccharide, Escherichia coli O111 B4	CTD	1.114e-07	0.001867	5.275e-06	5.435e-05	7	188	FLT1,HIF1A,C3,CCL5,TNF,IL6,VEGFA
355	ctd:D002336	Carnosine	CTD	1.135e-07	0.001902	5.313e-06	5.475e-05	4	22	HIF1A,TNF,IL6,VEGFA
356	ctd:C020491	rhein	CTD	1.135e-07	0.001902	5.313e-06	5.475e-05	4	22	HIF1A,TNF,IL6,VEGFA
357	ctd:D010837	Vitamin K 1	CTD	1.135e-07	0.001902	5.313e-06	5.475e-05	4	22	GSTP1,CASP8,F2,IL6
358	ctd:C119737	8-prenylnaringenin	CTD	1.135e-07	0.001902	5.313e-06	5.475e-05	4	22	IGF1R,C3,IL6,PRL
359	ctd:D020849	Raloxifene Hydrochloride	CTD	1.162e-07	0.001949	5.429e-06	5.594e-05	12	857	ARG2,SEMA3A,IGF1,MTHFR,C3,CCL5,TNF,ACE,NOS3,IL6,PRL,VEGFA
360	ctd:C412373	AG 1879	CTD	1.19e-07	0.001995	5.525e-06	5.693e-05	6	113	HIF1A,IGF1R,TNF,ACE,NOS3,VEGFA
361	ctd:C116926	rofecoxib	CTD	1.19e-07	0.001995	5.525e-06	5.693e-05	6	113	ANGPT1,C3,CCL5,TNF,TEAD4,IL6
362	CID000005300	NSC236997	Stitch	1.2e-07	0.002012	5.557e-06	5.726e-05	10	539	IGF1,IGF1R,ANGPT1,ANGPT2,TNF,ACE,NOS3,IL6,VEGFA,CYBA
363	ctd:D015124	8-Bromo Cyclic Adenosine Monophosphate	CTD	1.215e-07	0.002037	5.611e-06	5.782e-05	11	692	FZD4,IGF1,ANGPT1,CCL5,TNF,F2,NOS3,IL6,PRL,LGALS1,VEGFA
364	ctd:D064209	Phytochemicals	CTD	1.271e-07	0.002132	5.841e-06	6.019e-05	5	58	HIF1A,TNF,IL6,PRL,BDNF
365	CID000012733	CEES	Stitch	1.271e-07	0.002132	5.841e-06	6.019e-05	5	58	IGF1,CASP8,IHH,IL6,PRL
366	ctd:C044387	N,N,N',N'-tetrakis(2-pyridylmethyl)ethylenediamine	CTD	1.321e-07	0.002214	6.05e-06	6.234e-05	8	291	HIF1A,IGF1,IGF1R,SCG3,CASP8,TNF,IL6,VEGFA
367	ctd:D012834	Silver	CTD	1.336e-07	0.00224	6.104e-06	6.29e-05	17	1933	GSTP1,FLT1,IGF1,ANGPT1,APLN,MTHFR,MALAT1,CCL5,TNF,NDP,C5,ACE,NOS3,IL6,EPAS1,BDNF,VEGFA
368	ctd:C009091	protocatechuic acid	CTD	1.371e-07	0.002299	6.248e-06	6.438e-05	4	23	HIF1A,TNF,IL6,VEGFA
369	ctd:C038983	1,3-dimethylthiourea	CTD	1.387e-07	0.002326	6.303e-06	6.494e-05	5	59	CASP8,CCL5,TNF,C5,IL6
370	CID000003672	ibuprofen	Stitch	1.428e-07	0.002395	6.473e-06	6.67e-05	8	294	HIF1A,HLA-A,C3,TNF,F2,IL6,EPAS1,VEGFA
371	ctd:C017875	fisetin	CTD	1.511e-07	0.002533	6.828e-06	7.036e-05	5	60	HIF1A,CASP8,TNF,IL6,VEGFA
372	ctd:D002083	Butylated Hydroxyanisole	CTD	1.54e-07	0.002581	6.939e-06	7.15e-05	6	118	EPHX2,GSTP1,CASP8,TNF,IL6,VEGFA
373	ctd:D010126	Ozone	CTD	1.615e-07	0.002707	7.231e-06	7.451e-05	14	1272	ARG2,FZD4,GSTP1,IGF1R,ANGPT1,MALAT1,C3,KDR,CCL5,TNF,F2,NOS3,IL6,BDNF
374	CID000194176	HCEC	Stitch	1.619e-07	0.002714	7.231e-06	7.451e-05	6	119	KDR,CCL5,TNF,IL6,BDNF,VEGFA
375	CID000064505	cyclosarin	Stitch	1.641e-07	0.002751	7.231e-06	7.451e-05	7	199	IGF1,ANGPT2,APLN,HLA-A,HLA-B,IL6,VEGFA
376	CID003034747	C070379	Stitch	1.641e-07	0.002751	7.231e-06	7.451e-05	7	199	HIF1A,TNF,F2,NOS3,IL6,BDNF,VEGFA
377	CID000068839	NA 119	Stitch	1.642e-07	0.002753	7.231e-06	7.451e-05	3	6	FLT1,KDR,VEGFA
378	ctd:C467894	ambrisentan	CTD	1.642e-07	0.002753	7.231e-06	7.451e-05	3	6	TNF,NOS3,IL6
379	ctd:C030614	picolinic acid	CTD	1.643e-07	0.002755	7.231e-06	7.451e-05	4	24	IGF1,IGF1R,TNF,IL6
380	ctd:C055122	orlistat	CTD	1.643e-07	0.002755	7.231e-06	7.451e-05	5	61	CASP8,KDR,TNF,ATF4,IL6
381	ctd:C109986	2-aminoethoxydiphenyl borate	CTD	1.643e-07	0.002755	7.231e-06	7.451e-05	5	61	TNF,ATF4,NOS3,IL6,VEGFA
382	ctd:C076996	27-hydroxycholesterol	CTD	1.785e-07	0.002992	7.804e-06	8.042e-05	5	62	HIF1A,IGF1,NOS3,IL6,VEGFA
383	ctd:C076029	olanzapine	CTD	1.787e-07	0.002997	7.804e-06	8.042e-05	6	121	MTHFR,C3,C5,F2,PRL,BDNF
384	ctd:C056165	acetovanillone	CTD	1.787e-07	0.002997	7.804e-06	8.042e-05	6	121	HIF1A,CCL5,TNF,NOS3,IL6,CYBA
385	CID000002244	aspirin	Stitch	1.796e-07	0.003011	7.82e-06	8.058e-05	10	563	CASP8,KDR,TNF,F2,ACE,F5,NOS3,IL6,BDNF,VEGFA
386	CID000003143	Docetaxel trihydrate	Stitch	1.816e-07	0.003045	7.889e-06	8.129e-05	7	202	GSTP1,EPO,FLT1,CASP8,KDR,IL6,VEGFA
387	CID000000812	NSC20266	Stitch	1.877e-07	0.003147	8.116e-06	8.363e-05	6	122	FLT1,IGF1,IGF1R,KDR,IL6,PRL
388	CID000005033	radicicol	Stitch	1.878e-07	0.003149	8.116e-06	8.363e-05	7	203	HIF1A,IGF1,CASP8,NOS3,PRL,BDNF,VEGFA
389	ctd:D019328	Buthionine Sulfoximine	CTD	1.891e-07	0.00317	8.15e-06	8.398e-05	8	305	GSTP1,FLT1,HIF1A,CASP8,CCL5,TNF,IL6,VEGFA
390	ctd:D011765	Pyruvaldehyde	CTD	1.935e-07	0.003245	8.313e-06	8.566e-05	5	63	HIF1A,TNF,IL6,BDNF,VEGFA
391	ctd:D003994	Bucladesine	CTD	1.939e-07	0.00325	8.313e-06	8.566e-05	8	306	SEMA3A,HIF1A,IGF1,TNF,IL6,PRL,BDNF,VEGFA
392	CID000560326	DMOG	Stitch	1.953e-07	0.003275	8.354e-06	8.608e-05	4	25	HIF1A,NAMPT,EPAS1,VEGFA
393	ctd:C074702	chromium hexavalent ion	CTD	2.012e-07	0.003374	8.585e-06	8.846e-05	15	1513	FZD4,GSTP1,HIF1A,IGF1R,NAA15,CASP8,C3,CCL5,TNF,ACE,IL6,PRL,EPAS1,VEGFA,CYBA
394	CID000027993	Equilin sodium sulfate	Stitch	2.096e-07	0.003515	8.921e-06	9.192e-05	5	64	IGF1,TNF,ACE,IL6,PRL
395	ctd:D002087	Butyrates	CTD	2.215e-07	0.003715	9.404e-06	9.69e-05	7	208	GSTP1,CASP8,TNF,ACE,IL6,BDNF,LGALS1
396	CID000001401	PD173074	Stitch	2.267e-07	0.003802	9.575e-06	9.866e-05	5	65	FLT1,HIF1A,KDR,NOS3,VEGFA
397	CID000001866	6-keto-prostaglandin F1 alpha	Stitch	2.267e-07	0.003802	9.575e-06	9.866e-05	5	65	TNF,F2,ACE,NOS3,IL6
398	CID000013588	cyclopentenone	Stitch	2.273e-07	0.003811	9.575e-06	9.866e-05	6	126	GSTP1,HIF1A,IGF1,CASP8,TNF,IL6
399	ctd:D001218	Aspartame	CTD	2.305e-07	0.003864	9.661e-06	9.955e-05	4	26	KDR,F2,IL6,VEGFA
400	ctd:D012254	Ribavirin	CTD	2.305e-07	0.003864	9.661e-06	9.955e-05	4	26	EPO,CASP8,TNF,IL6
401	CID000003749	irbesartan	Stitch	2.382e-07	0.003994	9.959e-06	0.0001026	6	127	EPO,HLA-DRB1,CCL5,ACE,NOS3,CYBA
402	ctd:D003042	Cocaine	CTD	2.403e-07	0.004029	1.002e-05	0.0001033	14	1314	GSTP1,HIF1A,IGF1R,NAA15,CASP8,TNF,ATF4,ACE,NOS3,IL6,PRL,BDNF,VEGFA,CYBA
403	CID002812173	angiogenesis inhibitor	Stitch	2.495e-07	0.004183	1.038e-05	0.000107	6	128	SEMA3A,FLT1,HIF1A,ANGPT1,VASH1,EPAS1
404	ctd:D008628	Mercury	CTD	2.517e-07	0.00422	1.044e-05	0.0001075	10	584	ARG2,GSTP1,IGF1,SCG3,C3,TNF,ATF4,F5,IL6,BDNF
405	CID004369063	AC1N9ZLR	Stitch	2.521e-07	0.004227	1.044e-05	0.0001075	7	212	IGF1,IGF1R,HLA-A,CCL5,TNF,IL6,VEGFA
406	CID000065351	APDC	Stitch	2.598e-07	0.004356	1.073e-05	0.0001106	8	318	HIF1A,IGF1R,CASP8,CCL5,TNF,NOS3,IL6,VEGFA
407	ctd:D012256	Riboflavin	CTD	2.643e-07	0.004432	1.089e-05	0.0001122	5	67	MTHFR,CASP8,TNF,F2,IL6
408	ctd:C113580	U 0126	CTD	2.659e-07	0.004458	1.093e-05	0.0001126	9	444	GSTP1,HIF1A,IGF1,CASP8,TNF,NOS3,IL6,BDNF,VEGFA
409	ctd:C023635	dienogest	CTD	2.701e-07	0.004529	1.105e-05	0.0001138	4	27	IGF1,TNF,F2,IL6
410	ctd:D013864	Thioglycolates	CTD	2.701e-07	0.004529	1.105e-05	0.0001138	4	27	CCL5,TNF,NOS3,IL6
411	CID000657106	1xgj	Stitch	2.848e-07	0.004776	1.145e-05	0.000118	5	68	EPO,HLA-A,HLA-B,HLA-DRB1,IL6
412	ctd:D011134	Polysaccharides	CTD	2.848e-07	0.004776	1.145e-05	0.000118	5	68	IGF1R,TNF,IL6,VEGFA,CYBA
413	ctd:C019273	2,2-bis(4-glycidyloxyphenyl)propane	CTD	2.848e-07	0.004776	1.145e-05	0.000118	5	68	KDR,TNF,NOS3,IL6,VEGFA
414	ctd:D043343	Testosterone Propionate	CTD	2.848e-07	0.004776	1.145e-05	0.000118	5	68	GSTP1,IGF1R,TNF,IL6,BDNF
415	ctd:C038958	gadolinium chloride	CTD	2.848e-07	0.004776	1.145e-05	0.000118	5	68	IGF1,TNF,ATF4,IL6,VEGFA
416	CID000107712	homocysteine thiolactone	Stitch	2.862e-07	0.004798	1.145e-05	0.000118	6	131	HLA-B,MTHFR,C3,ATF4,ACE,F5
417	CID005280445	luteolin	Stitch	2.862e-07	0.004798	1.145e-05	0.000118	6	131	IGF1,CASP8,TNF,NOS3,IL6,VEGFA
418	ctd:C066668	vadimezan	CTD	2.869e-07	0.004811	1.145e-05	0.000118	3	7	TNF,IL6,VEGFA
419	ctd:C032078	4-methylumbelliferyl acetate	CTD	2.869e-07	0.004811	1.145e-05	0.000118	3	7	TNF,IL6,VEGFA
420	ctd:C007133	cortisol succinate	CTD	2.869e-07	0.004811	1.145e-05	0.000118	3	7	TNF,F2,IL6
421	ctd:C047246	temozolomide	CTD	2.952e-07	0.004949	1.176e-05	0.0001211	7	217	SEMA3A,MALAT1,CASP8,TNF,IL6,PRL,VEGFA
422	ctd:D047311	Luteolin	CTD	2.993e-07	0.005019	1.189e-05	0.0001226	6	132	HIF1A,CASP8,TNF,ACE,IL6,VEGFA
423	ctd:D012906	Smoke	CTD	3.038e-07	0.005094	1.204e-05	0.0001241	12	937	IGF1,IGF1R,HLA-DRB1,MALAT1,CCL5,TNF,ATF4,IHH,NOS3,IL6,BDNF,VEGFA
424	ctd:C067311	docetaxel	CTD	3.13e-07	0.005248	1.233e-05	0.000127	6	133	GSTP1,EPO,CASP8,TNF,IL6,VEGFA
425	ctd:C011512	alpha-naphthoflavone	CTD	3.13e-07	0.005248	1.233e-05	0.000127	6	133	GSTP1,CASP8,TNF,IL6,PRL,VEGFA
426	ctd:D000517	alpha-Chlorohydrin	CTD	3.144e-07	0.005271	1.233e-05	0.000127	12	940	GSTP1,IGF1,IGF1R,ANGPT1,MTHFR,LRP5,CASP8,CCL5,TNF,ACE,IL6,CYBA
427	ctd:D003981	Diazoxide	CTD	3.147e-07	0.005276	1.233e-05	0.000127	4	28	FLT1,NAMPT,TNF,IL6
428	ctd:C028451	3,4,3',4'-tetrachlorobiphenyl	CTD	3.147e-07	0.005277	1.233e-05	0.000127	9	453	EPHX2,HIF1A,NAMPT,KDR,TNF,C5,F5,NOS3,IL6
429	CID000000191	arabinosyladenine	Stitch	3.184e-07	0.005339	1.245e-05	0.0001282	11	762	EPO,HIF1A,C3,CCL5,TNF,F2,F5,NOS3,IL6,PRL,VEGFA
430	CID005311181	iloprost	Stitch	3.272e-07	0.005486	1.276e-05	0.0001315	6	134	ANGPT1,TNF,F2,NOS3,IL6,VEGFA
431	CID000003911	NSC377526	Stitch	3.297e-07	0.005528	1.28e-05	0.0001319	5	70	IGF1,HLA-A,HLA-B,PRL,VEGFA
432	ctd:D010431	Pentoxifylline	CTD	3.297e-07	0.005528	1.28e-05	0.0001319	5	70	CASP8,CCL5,TNF,IL6,VEGFA
433	ctd:D005473	Fluoxetine	CTD	3.522e-07	0.005905	1.364e-05	0.0001405	8	331	MALAT1,CASP8,CCL5,TNF,IL6,PRL,BDNF,VEGFA
434	CID000078964	prostaglandins G	Stitch	3.541e-07	0.005938	1.368e-05	0.000141	5	71	IGF1,NAMPT,F5,PRL,LGALS1
435	CID000023830	HEPES	Stitch	3.571e-07	0.005987	1.376e-05	0.0001418	6	136	GSTP1,HLA-A,HLA-B,HLA-DRB1,LRP5,ACE
436	ctd:D014810	Vitamin E	CTD	3.727e-07	0.006249	1.431e-05	0.0001474	15	1587	GSTP1,HIF1A,IGF1R,NAA15,ANGPT1,HLA-B,CCL5,TNF,F2,NOS3,IL6,PRL,EPAS1,VEGFA,CYBA
437	ctd:C029891	lead chloride	CTD	3.729e-07	0.006252	1.431e-05	0.0001474	6	137	GSTP1,MALAT1,CCL5,TNF,ATF4,NOS3
438	ctd:C008261	lead acetate	CTD	4.041e-07	0.006775	1.547e-05	0.0001594	16	1836	EPHX2,GSTP1,IGF1,MALAT1,CASP8,KDR,TNF,ATF4,IHH,SUCNR1,ACE,F5,NOS3,IL6,BDNF,VEGFA
439	CID003034916	CT-26	Stitch	4.061e-07	0.00681	1.551e-05	0.0001598	6	139	GSTP1,FLT1,KDR,TNF,IL6,VEGFA
440	ctd:D006493	Heparin	CTD	4.237e-07	0.007103	1.607e-05	0.0001656	6	140	C3,TNF,C5,F2,IL6,VEGFA
441	CID004369448	delta-(l-alpha-aminoadipoyl)-l-cysteinyl-glycine	Stitch	4.245e-07	0.007118	1.607e-05	0.0001656	7	229	IGF1,TNF,IHH,IL6,PRL,LGALS1,VEGFA
442	ctd:D001629	Bezafibrate	CTD	4.245e-07	0.007118	1.607e-05	0.0001656	7	229	IGF1,CCL5,TNF,ACE,NOS3,IL6,CYBA
443	CID000021157	buthionine sulfoximine	Stitch	4.245e-07	0.007118	1.607e-05	0.0001656	7	229	GSTP1,HIF1A,CASP8,TNF,NOS3,IL6,VEGFA
444	CID000001444	AC1L1BHQ	Stitch	4.372e-07	0.00733	1.651e-05	0.0001701	7	230	GSTP1,HIF1A,CASP8,CCL5,TNF,NOS3,IL6
445	CID000003001	NSC9567	Stitch	4.418e-07	0.007408	1.665e-05	0.0001715	6	141	GSTP1,TNF,ACE,NOS3,VEGFA,CYBA
446	ctd:C058636	calcitonin gene-related peptide (8-37)	CTD	4.584e-07	0.007686	1.719e-05	0.0001772	3	8	TNF,IL6,VEGFA
447	ctd:C104525	caraway oil	CTD	4.584e-07	0.007686	1.719e-05	0.0001772	3	8	CASP8,TNF,IL6
448	CID000002978	THC, delta 9	Stitch	4.606e-07	0.007723	1.722e-05	0.0001774	6	142	VASH1,CASP8,TNF,IL6,PRL,BDNF
449	CID000036511	Substance P	Stitch	4.611e-07	0.007731	1.722e-05	0.0001774	8	343	IGF1,CCL5,TNF,ACE,NOS3,IL6,PRL,BDNF
450	ctd:C076994	perfluorooctane sulfonic acid	CTD	4.627e-07	0.007759	1.723e-05	0.0001775	15	1614	EPHX2,GSTP1,FLT1,NAMPT,MALAT1,C3,KDR,CCL5,TNF,ATF4,F2,F5,NOS3,IL6,BDNF
451	CID000003101	diphenyleneiodonium	Stitch	4.634e-07	0.00777	1.723e-05	0.0001775	7	232	HIF1A,CASP8,TNF,NOS3,IL6,VEGFA,CYBA
452	CID000000232	DL-arginine	Stitch	4.713e-07	0.007903	1.748e-05	0.0001802	8	344	ARG2,IGF1,CCL5,TNF,ACE,NOS3,IL6,PRL
453	CID000004713	PD98059	Stitch	4.77e-07	0.007998	1.766e-05	0.0001819	7	233	HIF1A,IGF1,CCL5,TNF,NOS3,IL6,BDNF
454	ctd:C020754	herbimycin	CTD	4.814e-07	0.008072	1.77e-05	0.0001824	4	31	TNF,ACE,PRL,VEGFA
455	ctd:D012977	Sodium Nitrite	CTD	4.814e-07	0.008072	1.77e-05	0.0001824	4	31	HIF1A,TNF,IL6,VEGFA
456	ctd:D011112	Polymyxin B	CTD	4.814e-07	0.008072	1.77e-05	0.0001824	4	31	CCL5,TNF,IL6,PRL
457	ctd:C022838	nickel chloride	CTD	4.834e-07	0.008106	1.774e-05	0.0001828	13	1178	HIF1A,IGF1,NAMPT,APLN,CASP8,C3,CCL5,TNF,ACE,F5,NOS3,IL6,VEGFA
458	ctd:D015742	Propofol	CTD	4.986e-07	0.008361	1.822e-05	0.0001877	5	76	HIF1A,C3,TNF,IL6,PRL
459	CID003481670	AC1MQSA8	Stitch	4.986e-07	0.008361	1.822e-05	0.0001877	5	76	HLA-B,TNF,ATF4,IL6,PRL
460	ctd:C433788	lipopolysaccharide, E. coli O26-B6	CTD	5.001e-07	0.008385	1.823e-05	0.0001878	6	144	C3,CCL5,TNF,C5,NOS3,IL6
461	ctd:D013792	Thalidomide	CTD	5.021e-07	0.008419	1.823e-05	0.0001878	9	479	IGF1,ANGPT2,APLN,CASP8,C3,KDR,TNF,IL6,VEGFA
462	CID000015625	dioxin	Stitch	5.033e-07	0.008438	1.823e-05	0.0001878	8	347	GSTP1,HIF1A,CASP8,CCL5,TNF,EPAS1,VEGFA,CYBA
463	CID000285703	AC1L63MU	Stitch	5.033e-07	0.008438	1.823e-05	0.0001878	8	347	IGF1,CCL5,TNF,F2,ACE,NOS3,IL6,VEGFA
464	CID000003696	imipramine	Stitch	5.053e-07	0.008472	1.826e-05	0.0001881	7	235	SEMA3A,GSTP1,C3,TNF,F2,PRL,BDNF
465	ctd:C027576	4-hydroxy-2-nonenal	CTD	5.095e-07	0.008542	1.837e-05	0.0001893	11	799	GSTP1,IGF1,IGF1R,CASP8,CCL5,TNF,ATF4,NOS3,IL6,BDNF,VEGFA
466	ctd:C017803	zinc protoporphyrin	CTD	5.209e-07	0.008734	1.87e-05	0.0001927	6	145	FLT1,HIF1A,CASP8,TNF,F2,IL6
467	CID000002891	CAS 68-19-9	Stitch	5.209e-07	0.008734	1.87e-05	0.0001927	6	145	EPO,IGF1,IGF1R,HLA-B,MTHFR,F5
468	ctd:D008790	Metoprolol	CTD	5.325e-07	0.008928	1.904e-05	0.0001962	5	77	TNF,ACE,NOS3,IL6,VEGFA
469	CID000216326	lenalidomide	Stitch	5.325e-07	0.008928	1.904e-05	0.0001962	5	77	EPO,KDR,TNF,IL6,VEGFA
470	CID000000084	3-hydroxy-3-methylglutaryl-CoA	Stitch	5.349e-07	0.008969	1.908e-05	0.0001966	7	237	EPHX2,IGF1R,ACE,NOS3,IL6,VEGFA,CYBA
471	CID000000231	LS-63783	Stitch	5.419e-07	0.009085	1.92e-05	0.0001978	11	804	EPHX2,IGF1,C3,TNF,F2,ACE,NOS3,IL6,PRL,BDNF,CYBA
472	CID000003864	N(G)-nitro-L-arginine methyl ester	Stitch	5.424e-07	0.009094	1.92e-05	0.0001978	6	146	TNF,ACE,NOS3,IL6,VEGFA,CYBA
473	ctd:D002330	Carmustine	CTD	5.475e-07	0.009181	1.92e-05	0.0001978	9	484	SEMA3A,GSTP1,HIF1A,IGF1,MALAT1,TNF,NOS3,IL6,PRL
474	CID000005035	raloxifene	Stitch	5.487e-07	0.009201	1.92e-05	0.0001978	8	351	IGF1,C3,CCL5,TNF,ACE,NOS3,IL6,PRL
475	ctd:C545385	Mequindox	CTD	5.493e-07	0.009211	1.92e-05	0.0001978	4	32	TNF,ACE,IL6,CYBA
476	ctd:C017185	delphinidin	CTD	5.493e-07	0.009211	1.92e-05	0.0001978	4	32	HIF1A,TNF,EPAS1,VEGFA
477	ctd:D017964	Itraconazole	CTD	5.493e-07	0.009211	1.92e-05	0.0001978	4	32	GSTP1,KDR,CCL5,TNF
478	ctd:C093230	fexofenadine	CTD	5.493e-07	0.009211	1.92e-05	0.0001978	4	32	CCL5,TNF,NOS3,IL6
479	ctd:C002701	neocuproine	CTD	5.493e-07	0.009211	1.92e-05	0.0001978	4	32	CCL5,TNF,IL6,VEGFA
480	CID000000304	epicholesterol	Stitch	5.496e-07	0.009216	1.92e-05	0.0001978	10	636	EPHX2,NAMPT,HLA-A,MTHFR,SCG3,LRP5,IHH,F2,ACE,NOS3
481	CID005287847	DB04649	Stitch	5.875e-07	0.009851	2.048e-05	0.000211	6	148	FLT1,IGF1,IGF1R,HLA-A,TNF,PRL
482	CID006439662	Juvenile hormone	Stitch	6.055e-07	0.01015	2.106e-05	0.000217	5	79	EPHX2,IGF1,IGF1R,NOS3,VEGFA
483	ctd:C006552	kaempferol	CTD	6.112e-07	0.01025	2.122e-05	0.0002186	6	149	GSTP1,HIF1A,CCL5,TNF,IL6,VEGFA
484	ctd:D000596	Amino Acids	CTD	6.242e-07	0.01047	2.158e-05	0.0002224	4	33	HIF1A,IGF1,IGF1R,VEGFA
485	CID000170717	L-alpha-aminooxy-beta-phenylpropionic acid	Stitch	6.242e-07	0.01047	2.158e-05	0.0002224	4	33	HLA-A,TNF,IHH,IL6
486	ctd:D015655	1-Methyl-4-phenylpyridinium	CTD	6.475e-07	0.01086	2.234e-05	0.0002302	15	1657	ARG2,HIF1A,IGF1,IGF1R,HLA-A,MTHFR,TNF,ATF4,TEAD4,NOS3,IL6,EPAS1,BDNF,LGALS1,VEGFA
487	CID000000449	m vs	Stitch	6.504e-07	0.01091	2.239e-05	0.0002308	7	244	IGF1R,CASP8,TNF,IHH,NOS3,IL6,CYBA
488	ctd:C041525	3,3',4,5'-tetrahydroxystilbene	CTD	6.862e-07	0.01151	2.33e-05	0.0002401	5	81	HIF1A,CASP8,TNF,NOS3,IL6
489	ctd:D009270	Naloxone	CTD	6.862e-07	0.01151	2.33e-05	0.0002401	5	81	CCL5,TNF,IL6,PRL,BDNF
490	ctd:D017323	Dihematoporphyrin Ether	CTD	6.866e-07	0.01151	2.33e-05	0.0002401	3	9	EPO,TNF,VEGFA
491	ctd:C068564	phosphatidylbutanol	CTD	6.866e-07	0.01151	2.33e-05	0.0002401	3	9	KDR,TNF,VEGFA
492	CID000164140	SDZ MRL 953	Stitch	6.866e-07	0.01151	2.33e-05	0.0002401	3	9	C3,TNF,IL6
493	CID000421494	NSC-134754	Stitch	6.866e-07	0.01151	2.33e-05	0.0002401	3	9	HIF1A,IGF1,VEGFA
494	CID000011571	3,5-dichlorophenol	Stitch	6.866e-07	0.01151	2.33e-05	0.0002401	3	9	C3,C5,ACE
495	ctd:D013605	T-2 Toxin	CTD	6.923e-07	0.01161	2.345e-05	0.0002417	8	362	GSTP1,CASP8,TNF,SUCNR1,NOS3,IL6,EPAS1,LGALS1
496	CID000000977	oxygen	Stitch	7.06e-07	0.01184	2.359e-05	0.0002431	9	499	EPO,HIF1A,TNF,F2,NOS3,PRL,EPAS1,VEGFA,CYBA
497	ctd:D000242	Cyclic AMP	CTD	7.06e-07	0.01184	2.359e-05	0.0002431	7	247	EPO,VASH1,TNF,F2,IL6,PRL,VEGFA
498	ctd:D015230	Prostaglandin D2	CTD	7.063e-07	0.01184	2.359e-05	0.0002431	4	34	EPHX2,TNF,NOS3,IL6
499	CID005057842	AC1NMVIZ	Stitch	7.063e-07	0.01184	2.359e-05	0.0002431	4	34	ANGPT1,C3,NOS3,VEGFA
500	ctd:C015392	3-nitropropionic acid	CTD	7.063e-07	0.01184	2.359e-05	0.0002431	4	34	GSTP1,CASP8,TNF,BDNF
501	ctd:C040929	bafilomycin A1	CTD	7.063e-07	0.01184	2.359e-05	0.0002431	4	34	HIF1A,CASP8,TNF,IL6
502	ctd:D026422	S-Nitrosoglutathione	CTD	7.063e-07	0.01184	2.359e-05	0.0002431	4	34	HIF1A,CASP8,CCL5,TNF
503	ctd:D019311	Staurosporine	CTD	7.14e-07	0.01197	2.375e-05	0.0002448	6	153	EPO,IGF1,CASP8,TNF,PRL,VEGFA
504	ctd:C060540	polyhexamethyleneguanidine	CTD	7.14e-07	0.01197	2.375e-05	0.0002448	6	153	ARG2,HIF1A,APLN,TNF,IL6,VEGFA
505	ctd:D001397	Azoxymethane	CTD	7.297e-07	0.01223	2.418e-05	0.0002492	5	82	IGF1,IGF1R,TNF,IL6,VEGFA
506	CID000002949	NSC-270916	Stitch	7.297e-07	0.01223	2.418e-05	0.0002492	5	82	C3,TNF,F2,ACE,PRL
507	ctd:D008555	Melitten	CTD	7.753e-07	0.013	2.564e-05	0.0002642	5	83	CASP8,KDR,TNF,IL6,VEGFA
508	CID000003758	IBMX	Stitch	7.834e-07	0.01314	2.586e-05	0.0002664	8	368	IGF1,TNF,ATF4,F2,ACE,NOS3,PRL,BDNF
509	ctd:C002070	betulinic acid	CTD	7.963e-07	0.01335	2.597e-05	0.0002677	4	35	HIF1A,CASP8,TNF,VEGFA
510	CID000440311	beta-tyrosine	Stitch	7.963e-07	0.01335	2.597e-05	0.0002677	4	35	FLT1,KDR,C5,VEGFA
511	CID000126166	Factor Xiiib	Stitch	7.963e-07	0.01335	2.597e-05	0.0002677	4	35	MTHFR,C3,F2,F5
512	ctd:C410958	sauchinone	CTD	7.963e-07	0.01335	2.597e-05	0.0002677	4	35	HIF1A,CASP8,TNF,VEGFA
513	ctd:D020126	Brefeldin A	CTD	7.963e-07	0.01335	2.597e-05	0.0002677	4	35	TNF,ATF4,IL6,VEGFA
514	ctd:C024713	n-tetradecane	CTD	7.963e-07	0.01335	2.597e-05	0.0002677	4	35	IGF1,TNF,IL6,LGALS1
515	CID000065099	lucigenin	Stitch	8.231e-07	0.0138	2.68e-05	0.0002761	5	84	CCL5,ACE,NOS3,IL6,CYBA
516	CID000016850	fluorescein	Stitch	8.306e-07	0.01393	2.699e-05	0.0002781	6	157	FZD4,HLA-A,HLA-DRB1,NDP,F5,VEGFA
517	CID000003779	isoproterenol	Stitch	8.704e-07	0.01459	2.823e-05	0.0002909	10	669	NAMPT,IGF1R,HLA-DRB1,TNF,F2,ACE,NOS3,IL6,PRL,VEGFA
518	CID000123631	gefitinib	Stitch	8.74e-07	0.01465	2.829e-05	0.0002915	7	255	FLT1,HIF1A,IGF1,IGF1R,KDR,TNF,VEGFA
519	CID000093860	Velcade (bortezomib	Stitch	8.845e-07	0.01483	2.858e-05	0.0002945	8	374	HIF1A,IGF1R,CASP8,TNF,ATF4,NOS3,IL6,VEGFA
520	ctd:D006812	Humic Substances	CTD	8.944e-07	0.015	2.862e-05	0.0002949	4	36	CASP8,TNF,NOS3,VEGFA
521	ctd:C086276	cerivastatin	CTD	8.944e-07	0.015	2.862e-05	0.0002949	4	36	CASP8,TNF,F2,IL6
522	ctd:C443401	quercetin 3-O-glucuronide	CTD	8.944e-07	0.015	2.862e-05	0.0002949	4	36	TNF,NOS3,IL6,VEGFA
523	CID000512282	BX471	Stitch	8.944e-07	0.015	2.862e-05	0.0002949	4	36	CCL5,TNF,IL6,VEGFA
524	ctd:D007306	Insecticides	CTD	8.944e-07	0.015	2.862e-05	0.0002949	4	36	CCL5,TNF,PRL,BDNF
525	ctd:D000068579	Celecoxib	CTD	9.206e-07	0.01544	2.939e-05	0.0003029	8	376	GSTP1,SCG3,HLA-DRB1,CASP8,CCL5,TNF,IL6,VEGFA
526	CID000108143	tamibarotene	Stitch	9.256e-07	0.01552	2.939e-05	0.0003029	5	86	FLT1,ANGPT2,KDR,IL6,VEGFA
527	ctd:C479163	tofacitinib	CTD	9.256e-07	0.01552	2.939e-05	0.0003029	5	86	CCL5,TNF,IL6,PRL,VEGFA
528	ctd:D000841	Anisomycin	CTD	9.256e-07	0.01552	2.939e-05	0.0003029	5	86	IGF1,CASP8,CCL5,TNF,VEGFA
529	CID004369451	T1 d	Stitch	9.279e-07	0.01556	2.941e-05	0.0003031	6	160	HLA-B,LRP5,CCL5,TNF,ACE,IL6
530	ctd:C088658	zoledronic acid	CTD	9.404e-07	0.01577	2.975e-05	0.0003066	14	1471	EPHX2,HIF1A,IGF1,NAMPT,HLA-A,HLA-DRB1,VASH1,CASP8,C3,TNF,ATF4,SUCNR1,IL6,VEGFA
531	ctd:C007738	fluoranthene	CTD	9.476e-07	0.01589	2.992e-05	0.0003083	11	851	GSTP1,HIF1A,IGF1,APLN,TNF,ATF4,ACE,NOS3,IL6,BDNF,VEGFA
532	ctd:C099015	azaspirane	CTD	9.794e-07	0.01642	3.056e-05	0.0003149	3	10	CASP8,TNF,IL6
533	CID000344218	pleurotin	Stitch	9.794e-07	0.01642	3.056e-05	0.0003149	3	10	HIF1A,EPAS1,VEGFA
534	ctd:C070646	CAP18 lipopolysaccharide-binding protein	CTD	9.794e-07	0.01642	3.056e-05	0.0003149	3	10	CCL5,TNF,IL6
535	ctd:C011145	zaprinast	CTD	9.794e-07	0.01642	3.056e-05	0.0003149	3	10	TNF,ACE,VEGFA
536	ctd:C458419	malvidin-3-glucoside	CTD	9.794e-07	0.01642	3.056e-05	0.0003149	3	10	TNF,NOS3,IL6
537	CID000002225	MPC-1304	Stitch	9.806e-07	0.01644	3.056e-05	0.0003149	5	87	ARG2,CCL5,IL6,PRL,VEGFA
538	ctd:D002997	Clomipramine	CTD	9.806e-07	0.01644	3.056e-05	0.0003149	5	87	GSTP1,CASP8,TNF,IL6,PRL
539	ctd:C487081	belinostat	CTD	9.823e-07	0.01647	3.056e-05	0.0003149	10	678	FLT1,IGF1,ANGPT1,ANGPT2,HLA-B,SCG3,CASP8,KDR,NDP,IL6
540	ctd:D000068298	Fluticasone	CTD	1.001e-06	0.01679	3.092e-05	0.0003186	4	37	CASP8,CCL5,TNF,IL6
541	ctd:C070055	2,3',4,4',5-pentachlorobiphenyl	CTD	1.001e-06	0.01679	3.092e-05	0.0003186	4	37	HIF1A,KDR,TNF,IL6
542	ctd:C050950	tetrakis(N-methyl-4-pyridiniumyl)porphine manganese(III) complex	CTD	1.001e-06	0.01679	3.092e-05	0.0003186	4	37	CASP8,TNF,NOS3,BDNF
543	ctd:C060506	sphingosine 1-phosphate	CTD	1.001e-06	0.01679	3.092e-05	0.0003186	4	37	IGF1,KDR,TNF,IL6
544	ctd:D004137	Dinitrochlorobenzene	CTD	1.016e-06	0.01704	3.127e-05	0.0003222	8	381	ARG2,GSTP1,NAMPT,CCL5,TNF,IL6,BDNF,VEGFA
545	ctd:D009853	Omeprazole	CTD	1.016e-06	0.01704	3.127e-05	0.0003222	8	381	GSTP1,IGF1,HLA-B,CASP8,KDR,TNF,IL6,PRL
546	CID000107854	phorbol 12-myristate	Stitch	1.021e-06	0.01712	3.135e-05	0.0003231	7	261	FLT1,NAA15,CCL5,TNF,IL6,VEGFA,CYBA
547	ctd:D007501	Iron	CTD	1.037e-06	0.01738	3.177e-05	0.0003274	8	382	EPO,HIF1A,IGF1,CCL5,TNF,F2,IL6,EPAS1
548	CID000004865	C22H22O8	Stitch	1.072e-06	0.01797	3.28e-05	0.000338	6	164	GSTP1,HIF1A,IGF1R,CASP8,C5,IL6
549	ctd:C074283	estradiol 3-benzoate	CTD	1.098e-06	0.01841	3.354e-05	0.0003456	5	89	IGF1,IGF1R,CASP8,PRL,BDNF
550	ctd:C007768	formononetin	CTD	1.117e-06	0.01874	3.407e-05	0.000351	4	38	EPO,HIF1A,CASP8,NOS3
551	CID000000942	Nicorette	Stitch	1.145e-06	0.0192	3.485e-05	0.0003592	9	529	HIF1A,KDR,CCL5,TNF,NOS3,IL6,PRL,BDNF,VEGFA
552	CID000003715	indomethacin	Stitch	1.151e-06	0.0193	3.496e-05	0.0003603	10	690	EPO,IGF1,HLA-A,TNF,F2,ACE,NOS3,IL6,PRL,VEGFA
553	CID000005538	9cRA	Stitch	1.16e-06	0.01946	3.514e-05	0.0003621	15	1735	SEMA3A,GSTP1,IGF1,NAMPT,NAA15,CASP8,CCL5,TNF,IHH,NOS3,IL6,EPAS1,BDNF,LGALS1,VEGFA
554	ctd:C419153	1,3,5-tris(4-hydroxyphenyl)-4-propyl-1H-pyrazole	CTD	1.161e-06	0.01947	3.514e-05	0.0003621	5	90	C3,TNF,IHH,NOS3,PRL
555	CID000003937	AC1L1H1Q	Stitch	1.192e-06	0.01998	3.593e-05	0.0003703	6	167	NAA15,CASP8,TNF,ACE,IL6,VEGFA
556	CID000148191	NSC-683864	Stitch	1.192e-06	0.01998	3.593e-05	0.0003703	6	167	FLT1,HIF1A,IGF1R,KDR,EPAS1,VEGFA
557	ctd:D013893	Thiram	CTD	1.219e-06	0.02044	3.669e-05	0.0003781	9	533	EPHX2,FLT1,NAMPT,ANGPT1,SCG3,KDR,TNF,BDNF,VEGFA
558	CID000104904	ecgonine methyl ester	Stitch	1.227e-06	0.02057	3.686e-05	0.0003798	5	91	FLT1,IGF1,ANGPT2,KDR,VEGFA
559	CID002733513	PTIO	Stitch	1.243e-06	0.02085	3.729e-05	0.0003843	4	39	NAMPT,CASP8,ATF4,NOS3
560	CID000004364	NSC350593	Stitch	1.249e-06	0.02094	3.739e-05	0.0003853	7	269	NAMPT,CCL5,TNF,C5,F2,IL6,CYBA
561	CID000002750	ciglitazone	Stitch	1.277e-06	0.02142	3.817e-05	0.0003934	6	169	CASP8,CCL5,TNF,NOS3,IL6,VEGFA
562	ctd:C056507	gemcitabine	CTD	1.28e-06	0.02146	3.819e-05	0.0003935	7	270	HIF1A,IGF1R,CASP8,TNF,IL6,BDNF,VEGFA
563	ctd:D000968	Antimycin A	CTD	1.295e-06	0.02171	3.857e-05	0.0003974	5	92	HIF1A,CCL5,TNF,EPAS1,VEGFA
564	ctd:D007654	Ketoconazole	CTD	1.312e-06	0.022	3.9e-05	0.0004019	7	271	GSTP1,EPO,CCL5,TNF,IL6,PRL,VEGFA
565	ctd:D052179	Antigens, Plant	CTD	1.345e-06	0.02255	3.935e-05	0.0004055	3	11	CCL5,TNF,IL6
566	ctd:D003008	Cloprostenol	CTD	1.345e-06	0.02255	3.935e-05	0.0004055	3	11	FLT1,KDR,VEGFA
567	CID005329103	SU11652	Stitch	1.345e-06	0.02255	3.935e-05	0.0004055	3	11	FLT1,KDR,VEGFA
568	ctd:C531389	quercetin 3'-sulfate	CTD	1.345e-06	0.02255	3.935e-05	0.0004055	3	11	KDR,TNF,VEGFA
569	CID000448781	Mr 20	Stitch	1.345e-06	0.02255	3.935e-05	0.0004055	3	11	CASP8,IL6,VEGFA
570	ctd:C094782	5,3'-dihydroxy-3,6,7,8,4'-pentamethoxyflavone	CTD	1.345e-06	0.02255	3.935e-05	0.0004055	3	11	TNF,IL6,VEGFA
571	ctd:C447621	16-(4-fluorophenoxy)lipoxin A4	CTD	1.345e-06	0.02255	3.935e-05	0.0004055	3	11	KDR,TNF,VEGFA
572	ctd:C519899	AS602868	CTD	1.345e-06	0.02255	3.935e-05	0.0004055	3	11	CASP8,TNF,IL6
573	ctd:C494622	CPS 49	CTD	1.345e-06	0.02255	3.935e-05	0.0004055	3	11	CASP8,IL6,VEGFA
574	CID000213546	poly(I-C	Stitch	1.368e-06	0.02294	3.996e-05	0.0004117	6	171	FLT1,IGF1,CCL5,TNF,IHH,IL6
575	CID000003054	NSC19448	Stitch	1.378e-06	0.0231	4.001e-05	0.0004123	7	273	IGF1,IGF1R,HLA-A,CASP8,C3,NOS3,PRL
576	CID000003819	AC1L1GSB	Stitch	1.379e-06	0.02313	4.001e-05	0.0004123	4	40	CASP8,CCL5,TNF,IL6
577	ctd:D001310	Auranofin	CTD	1.379e-06	0.02313	4.001e-05	0.0004123	4	40	HLA-DRB1,CASP8,TNF,IL6
578	ctd:D001971	Bromocriptine	CTD	1.379e-06	0.02313	4.001e-05	0.0004123	4	40	TNF,PRL,BDNF,VEGFA
579	ctd:D004642	Emodin	CTD	1.464e-06	0.02454	4.239e-05	0.0004368	6	173	GSTP1,HIF1A,CASP8,TNF,IL6,VEGFA
580	CID000001134	deoxythymidin	Stitch	1.482e-06	0.02485	4.284e-05	0.0004414	7	276	EPO,FLT1,IGF1,IGF1R,MTHFR,PRL,VEGFA
581	ctd:D001554	Benzene	CTD	1.5e-06	0.02516	4.33e-05	0.0004462	11	892	GSTP1,EPO,NAMPT,CASP8,CCL5,TNF,ATF4,F5,IL6,LGALS1,VEGFA
582	ctd:D014260	Triclosan	CTD	1.519e-06	0.02547	4.376e-05	0.0004509	5	95	IGF1R,C3,TNF,IL6,PRL
583	ctd:D000068718	Rosuvastatin Calcium	CTD	1.526e-06	0.02559	4.389e-05	0.0004523	4	41	KDR,TNF,NOS3,CYBA
584	CID000065999	telmisartan	Stitch	1.6e-06	0.02682	4.585e-05	0.0004725	5	96	NAMPT,APLN,ACE,NOS3,CYBA
585	CID000003684	AC1L1GHE	Stitch	1.6e-06	0.02682	4.585e-05	0.0004725	5	96	HIF1A,IGF1,C3,PRL,BDNF
586	ctd:D005707	Gallic Acid	CTD	1.684e-06	0.02824	4.77e-05	0.0004916	5	97	HIF1A,CASP8,TNF,IL6,VEGFA
587	ctd:D015282	Octreotide	CTD	1.684e-06	0.02824	4.77e-05	0.0004916	4	42	IGF1,TNF,PRL,VEGFA
588	CID010995375	CHEMBL459685	Stitch	1.684e-06	0.02824	4.77e-05	0.0004916	4	42	IGF1,HLA-B,CASP8,NOS3
589	ctd:C009684	withaferin A	CTD	1.684e-06	0.02824	4.77e-05	0.0004916	4	42	TNF,ATF4,IL6,VEGFA
590	ctd:C417521	SB 216763	CTD	1.684e-06	0.02824	4.77e-05	0.0004916	4	42	TNF,ATF4,IL6,VEGFA
591	ctd:D019695	Glycyrrhizic Acid	CTD	1.684e-06	0.02824	4.77e-05	0.0004916	4	42	EPHX2,CASP8,TNF,IL6
592	ctd:C496827	salubrinal	CTD	1.684e-06	0.02824	4.77e-05	0.0004916	4	42	EPO,CCL5,ATF4,VEGFA
593	ctd:C000228	aristolochic acid I	CTD	1.728e-06	0.02897	4.884e-05	0.0005033	6	178	GSTP1,HIF1A,CCL5,TNF,EPAS1,VEGFA
594	ctd:D015525	Fatty Acids, Omega-3	CTD	1.772e-06	0.02971	4.995e-05	0.0005147	5	98	GSTP1,IGF1,TNF,IL6,VEGFA
595	ctd:C015330	lycorine	CTD	1.79e-06	0.03002	4.995e-05	0.0005147	3	12	TNF,IL6,VEGFA
596	CID000073174	dehydrocostus lactone	Stitch	1.79e-06	0.03002	4.995e-05	0.0005147	3	12	CASP8,TNF,NOS3
597	ctd:D005436	Floxacillin	CTD	1.79e-06	0.03002	4.995e-05	0.0005147	3	12	HLA-B,TNF,IL6
598	CID000474412	dGprG2'OMe	Stitch	1.79e-06	0.03002	4.995e-05	0.0005147	3	12	FLT1,KDR,VEGFA
599	ctd:C106592	3,9-bis((ethylthio)methyl)-K-252a	CTD	1.79e-06	0.03002	4.995e-05	0.0005147	3	12	TNF,ATF4,IL6
600	ctd:D008625	Tiopronin	CTD	1.79e-06	0.03002	4.995e-05	0.0005147	3	12	GSTP1,HLA-B,TNF
601	CID000130042	fumagillol	Stitch	1.79e-06	0.03002	4.995e-05	0.0005147	3	12	FLT1,KDR,VEGFA
602	CID000004666	taxol	Stitch	1.831e-06	0.0307	5.1e-05	0.0005255	9	560	GSTP1,EPO,FLT1,CASP8,TNF,F2,NOS3,IL6,VEGFA
603	ctd:D017374	Paroxetine	CTD	1.854e-06	0.03109	5.147e-05	0.0005304	4	43	CASP8,TNF,BDNF,VEGFA
604	CID000214166	A-20	Stitch	1.854e-06	0.03109	5.147e-05	0.0005304	4	43	LRP5,TNF,IL6,VEGFA
605	CID000177837	1k1n	Stitch	1.965e-06	0.03295	5.447e-05	0.0005613	6	182	FZD4,EPO,HLA-A,CCL5,ACE,VEGFA
606	ctd:D016264	Dextran Sulfate	CTD	2.029e-06	0.03402	5.614e-05	0.0005785	6	183	HIF1A,IGF1,TNF,IL6,VEGFA,CYBA
607	ctd:D019888	Nelfinavir	CTD	2.037e-06	0.03415	5.616e-05	0.0005787	4	44	CASP8,TNF,ATF4,IL6
608	ctd:C045645	cilostazol	CTD	2.037e-06	0.03415	5.616e-05	0.0005787	4	44	CASP8,TNF,NOS3,IL6
609	CID005280443	apigenin	Stitch	2.094e-06	0.03511	5.765e-05	0.0005941	6	184	HIF1A,IGF1,CASP8,TNF,NOS3,VEGFA
610	ctd:D012838	Silymarin	CTD	2.161e-06	0.03623	5.94e-05	0.0006121	6	185	GSTP1,IGF1,CASP8,CCL5,TNF,IL6
611	CID000004159	medrol	Stitch	2.23e-06	0.03738	6.095e-05	0.000628	6	186	EPO,IGF1,HLA-A,C3,TNF,IL6
612	ctd:C071423	capsazepine	CTD	2.232e-06	0.03742	6.095e-05	0.000628	4	45	IGF1,CASP8,TNF,IL6
613	ctd:D000666	Amphotericin B	CTD	2.232e-06	0.03742	6.095e-05	0.000628	4	45	GSTP1,EPO,HIF1A,TNF
614	CID006450551	axitinib	Stitch	2.232e-06	0.03742	6.095e-05	0.000628	4	45	EPO,FLT1,KDR,VEGFA
615	ctd:D002726	Chlorogenic Acid	CTD	2.267e-06	0.03801	6.17e-05	0.0006358	5	103	CASP8,TNF,F2,NOS3,IL6
616	ctd:C099952	bifenthrin	CTD	2.267e-06	0.03801	6.17e-05	0.0006358	5	103	GSTP1,MTHFR,CASP8,TNF,IL6
617	CID000000951	noradrealine	Stitch	2.274e-06	0.03813	6.18e-05	0.0006368	9	575	HIF1A,TNF,NDP,ACE,NOS3,IL6,PRL,BDNF,VEGFA
618	CID005283146	11,12-DHET	Stitch	2.324e-06	0.03897	6.235e-05	0.0006425	3	13	EPHX2,HIF1A,NOS3
619	ctd:D004061	Diflunisal	CTD	2.324e-06	0.03897	6.235e-05	0.0006425	3	13	HLA-A,TNF,IL6
620	ctd:C005044	hydroxyethyl methacrylate	CTD	2.324e-06	0.03897	6.235e-05	0.0006425	3	13	TNF,IL6,VEGFA
621	ctd:C020946	triethylene glycol dimethacrylate	CTD	2.324e-06	0.03897	6.235e-05	0.0006425	3	13	GSTP1,CASP8,TNF
622	ctd:C548887	MK 2206	CTD	2.324e-06	0.03897	6.235e-05	0.0006425	3	13	IGF1,TNF,ATF4
623	ctd:C019107	tetramethylthiourea	CTD	2.324e-06	0.03897	6.235e-05	0.0006425	3	13	EPO,CCL5,TNF
624	ctd:C484876	scutellarin	CTD	2.324e-06	0.03897	6.235e-05	0.0006425	3	13	HIF1A,NOS3,VEGFA
625	CID000216386	CEP-7055	Stitch	2.324e-06	0.03897	6.235e-05	0.0006425	3	13	FLT1,KDR,VEGFA
626	CID000040634	Trolox	Stitch	2.378e-06	0.03986	6.358e-05	0.0006551	5	104	FLT1,TNF,F2,NOS3,BDNF
627	CID000014785	O-C-O	Stitch	2.378e-06	0.03986	6.358e-05	0.0006551	5	104	SEMA3A,ATF4,NOS3,PRL,VEGFA
628	ctd:D014050	Toluene	CTD	2.405e-06	0.04032	6.42e-05	0.0006616	10	749	GSTP1,FLT1,NAMPT,ANGPT2,C3,KDR,ACE,NOS3,IL6,BDNF
629	CID000017725	TMTU	Stitch	2.441e-06	0.04092	6.486e-05	0.0006683	4	46	EPO,HIF1A,CCL5,TNF
630	CID000072422	mesoporphyrin	Stitch	2.441e-06	0.04092	6.486e-05	0.0006683	4	46	HLA-A,NOS3,IL6,VEGFA
631	ctd:C121707	7,3'-dihydroxy-4'-methoxyisoflavone	CTD	2.441e-06	0.04092	6.486e-05	0.0006683	4	46	EPO,FLT1,HIF1A,VEGFA
632	ctd:C020748	ferrous sulfate	CTD	2.612e-06	0.04379	6.929e-05	0.000714	5	106	HIF1A,TNF,F2,IL6,EPAS1
633	ctd:D015251	Epirubicin	CTD	2.664e-06	0.04466	7.001e-05	0.0007214	4	47	CASP8,TNF,NOS3,IL6
634	ctd:C000591600	tetrachlorobenzoquinone	CTD	2.664e-06	0.04466	7.001e-05	0.0007214	4	47	CASP8,TNF,ATF4,IL6
635	ctd:D003900	Desoxycorticosterone	CTD	2.664e-06	0.04466	7.001e-05	0.0007214	4	47	TNF,NOS3,IL6,CYBA
636	ctd:D003891	Desipramine	CTD	2.664e-06	0.04466	7.001e-05	0.0007214	4	47	CCL5,TNF,IL6,BDNF
637	CID003060738	Hs 5	Stitch	2.664e-06	0.04466	7.001e-05	0.0007214	4	47	EPO,IGF1R,HLA-B,IL6
638	ctd:C525422	SRT1720	CTD	2.664e-06	0.04466	7.001e-05	0.0007214	4	47	NAMPT,TNF,IL6,VEGFA
639	CID000000588	creatinine	Stitch	2.691e-06	0.04512	7.061e-05	0.0007276	7	302	EPO,IGF1,HLA-A,MTHFR,C3,ACE,NOS3
640	CID000002691	AC1L1E8W	Stitch	2.736e-06	0.04587	7.167e-05	0.0007385	5	107	GSTP1,TNF,IL6,BDNF,VEGFA
641	ctd:D006820	Hyaluronic Acid	CTD	2.845e-06	0.0477	7.441e-05	0.0007668	6	194	CASP8,CCL5,TNF,IL6,LGALS1,VEGFA
642	CID000002462	Turbuhaler	Stitch	2.864e-06	0.04802	7.475e-05	0.0007702	5	108	FLT1,CCL5,TNF,IL6,VEGFA
643	ctd:C016104	sodium bichromate	CTD	2.867e-06	0.04806	7.475e-05	0.0007702	14	1616	EPHX2,GSTP1,IGF1,NAMPT,CASP8,C3,CCL5,TNF,ATF4,F2,ACE,F5,IL6,LGALS1
644	ctd:C064758	Ro 31-8220	CTD	2.902e-06	0.04865	7.496e-05	0.0007724	4	48	CASP8,TNF,IL6,VEGFA
645	ctd:C403304	zerumbone	CTD	2.902e-06	0.04865	7.496e-05	0.0007724	4	48	GSTP1,TNF,IL6,VEGFA
646	ctd:D012839	Simazine	CTD	2.902e-06	0.04865	7.496e-05	0.0007724	4	48	TNF,NOS3,PRL,VEGFA
647	ctd:C060893	MK-886	CTD	2.902e-06	0.04865	7.496e-05	0.0007724	4	48	EPHX2,TNF,NOS3,IL6
648	ctd:D000641	Ammonia	CTD	2.902e-06	0.04865	7.496e-05	0.0007724	4	48	IGF1,TNF,IL6,PRL
649	ctd:C034221	catechol	CTD	2.902e-06	0.04865	7.496e-05	0.0007724	4	48	CASP8,CCL5,TNF,VEGFA
650	ctd:D019830	Adenosine-5'-(N-ethylcarboxamide)	CTD	2.954e-06	0.04953	7.561e-05	0.0007791	3	14	EPHX2,TNF,VEGFA
651	ctd:C401932	15,16-dihydrotanshinone I	CTD	2.954e-06	0.04953	7.561e-05	0.0007791	3	14	EPO,HIF1A,VEGFA
652	ctd:C579046	GDC-0152	CTD	2.954e-06	0.04953	7.561e-05	0.0007791	3	14	CCL5,TNF,IL6
653	ctd:D014451	Ubiquinone	CTD	2.954e-06	0.04953	7.561e-05	0.0007791	3	14	TNF,NOS3,IL6
654	ctd:C030517	myxothiazol	CTD	2.954e-06	0.04953	7.561e-05	0.0007791	3	14	TNF,IL6,EPAS1
655	ctd:C417520	3-(3-chloro-4-hydroxyphenylamino)-4-(4-nitrophenyl)-1H-pyrrole-2,5-dione	CTD	2.954e-06	0.04953	7.561e-05	0.0007791	3	14	CASP8,TNF,IL6
656	CID000000264	butyrate	Stitch	2.972e-06	0.04983	7.596e-05	0.0007827	10	767	GSTP1,EPO,HIF1A,CASP8,TNF,NOS3,IL6,PRL,LGALS1,VEGFA
657	ctd:D013467	Sulindac	CTD	3.007e-06	0.05042	7.674e-05	0.0007908	9	595	HIF1A,NAMPT,HLA-B,VASH1,CASP8,CCL5,TNF,ATF4,IL6
658	CID000000896	melatonin	Stitch	3.119e-06	0.0523	7.949e-05	0.0008191	8	443	HIF1A,IGF1,CCL5,TNF,NOS3,IL6,PRL,BDNF
659	ctd:D003561	Cytarabine	CTD	3.133e-06	0.05253	7.971e-05	0.0008214	9	598	ARG2,HIF1A,MTHFR,CASP8,TNF,F2,IL6,PRL,CYBA
660	CID000002358	DIMBOA	Stitch	3.155e-06	0.05289	8.002e-05	0.0008246	4	49	HIF1A,ANGPT2,TNF,VEGFA
661	ctd:C474021	indirubin-3'-monoxime	CTD	3.155e-06	0.05289	8.002e-05	0.0008246	4	49	EPHX2,CASP8,TNF,IL6
662	CID000004973	heme b	Stitch	3.172e-06	0.05318	8.033e-05	0.0008278	8	444	EPO,C3,TNF,C5,NOS3,IL6,VEGFA,CYBA
663	ctd:D020106	Acrylamide	CTD	3.201e-06	0.05366	8.094e-05	0.0008341	6	198	GSTP1,IGF1,TNF,ATF4,IL6,VEGFA
664	CID011947681	nitroprusside	Stitch	3.278e-06	0.05496	8.265e-05	0.0008517	5	111	HIF1A,F2,ACE,F5,NOS3
665	ctd:D008798	Mevalonic Acid	CTD	3.278e-06	0.05496	8.265e-05	0.0008517	5	111	CASP8,TNF,NOS3,IL6,VEGFA
666	CID000000158	8-iso-prostaglandin E2	Stitch	3.353e-06	0.05622	8.441e-05	0.0008698	9	603	HIF1A,IGF1,HLA-A,CCL5,TNF,NOS3,IL6,PRL,VEGFA
667	ctd:D014801	Vitamin A	CTD	3.392e-06	0.05687	8.526e-05	0.0008785	6	200	GSTP1,EPO,FLT1,TNF,NOS3,VEGFA
668	ctd:C056599	icariin	CTD	3.424e-06	0.05741	8.581e-05	0.0008842	4	50	IGF1,TNF,NOS3,IL6
669	ctd:C062876	cetrorelix	CTD	3.424e-06	0.05741	8.581e-05	0.0008842	4	50	IGF1,IL6,PRL,VEGFA
670	CID000005311	vorinostat	Stitch	3.479e-06	0.05834	8.707e-05	0.0008972	7	314	SEMA3A,FLT1,IGF1,CASP8,IL6,BDNF,LGALS1
671	CID000000739	dona	Stitch	3.491e-06	0.05853	8.722e-05	0.0008988	6	201	CASP8,C3,CCL5,TNF,NOS3,IL6
672	ctd:C434003	3-(4-methylphenylsulfonyl)-2-propenenitrile	CTD	3.579e-06	0.06001	8.93e-05	0.0009202	5	113	CASP8,CCL5,TNF,IL6,CYBA
673	ctd:D003276	Contraceptives, Oral	CTD	3.687e-06	0.06182	9.118e-05	0.0009395	3	15	F2,F5,PRL
674	ctd:C464444	dehydroxymethylepoxyquinomicin	CTD	3.687e-06	0.06182	9.118e-05	0.0009395	3	15	CASP8,TNF,VEGFA
675	ctd:C451162	Dermatophagoides pteronyssinus antigen p 1	CTD	3.687e-06	0.06182	9.118e-05	0.0009395	3	15	CCL5,TNF,IL6
676	CID003250250	AC1MLTEL	Stitch	3.687e-06	0.06182	9.118e-05	0.0009395	3	15	HIF1A,IGF1,NOS3
677	ctd:C496966	Eudragit RSPO	CTD	3.687e-06	0.06182	9.118e-05	0.0009395	3	15	APLN,CASP8,TNF
678	ctd:C036837	2,3,5-trimethyl-6-(12-hydroxy-5,10-dodecadiynyl)-1,4-benzoquinone	CTD	3.687e-06	0.06182	9.118e-05	0.0009395	3	15	CASP8,TNF,IL6
679	ctd:D006830	Hydralazine	CTD	3.694e-06	0.06193	9.12e-05	0.0009398	10	786	GSTP1,FLT1,NAMPT,HLA-A,HLA-B,TNF,ACE,IL6,EPAS1,LGALS1
680	ctd:C017953	tetramethylpyrazine	CTD	3.71e-06	0.0622	9.12e-05	0.0009398	4	51	HIF1A,CASP8,TNF,IL6
681	CID000125486	TISCH	Stitch	3.71e-06	0.0622	9.12e-05	0.0009398	4	51	HLA-A,HLA-B,ACE,IL6
682	ctd:C118559	1-bromopropane	CTD	3.71e-06	0.0622	9.12e-05	0.0009398	4	51	GSTP1,TNF,IL6,BDNF
683	CID000004284	DETA	Stitch	3.737e-06	0.06266	9.175e-05	0.0009454	5	114	TSPAN12,SEMA3A,KDR,BDNF,VEGFA
684	ctd:D004051	Diethylhexyl Phthalate	CTD	3.763e-06	0.0631	9.225e-05	0.0009506	14	1654	EPHX2,GSTP1,IGF1,NAMPT,CASP8,C3,TNF,ATF4,NOS3,IL6,PRL,BDNF,LGALS1,VEGFA
685	CID000005589	AC1L1KON	Stitch	3.901e-06	0.06541	9.535e-05	0.0009826	5	115	CASP8,TNF,NOS3,IL6,VEGFA
686	ctd:D010424	Pentobarbital	CTD	3.901e-06	0.06541	9.535e-05	0.0009826	5	115	CASP8,TNF,IL6,PRL,BDNF
687	ctd:D000068677	Sildenafil Citrate	CTD	4.013e-06	0.06728	9.779e-05	0.001008	4	52	ANGPT1,TNF,NOS3,VEGFA
688	ctd:C568713	GSK1210151A	CTD	4.013e-06	0.06728	9.779e-05	0.001008	4	52	TNF,IL6,EPAS1,VEGFA
689	ctd:C021751	tanshinone	CTD	4.071e-06	0.06825	9.906e-05	0.001021	5	116	GSTP1,LRP5,CASP8,NOS3,VEGFA
690	ctd:D004448	Echinomycin	CTD	4.179e-06	0.07008	9.968e-05	0.001027	2	2	HIF1A,VEGFA
691	ctd:C077992	arctiin	CTD	4.179e-06	0.07008	9.968e-05	0.001027	2	2	TNF,IL6
692	ctd:C461648	Ro 106-9920	CTD	4.179e-06	0.07008	9.968e-05	0.001027	2	2	TNF,IL6
693	ctd:C037026	diglycyl-histidine	CTD	4.179e-06	0.07008	9.968e-05	0.001027	2	2	TNF,IL6
694	ctd:C555017	1',3'-dihydro-1'-ethanol-3',3'-dimethyl-8-methoxy-6-nitro-spiro(2H-1-benzopyran-2,2'-(2H)-indole)	CTD	4.179e-06	0.07008	9.968e-05	0.001027	2	2	TNF,IL6
695	ctd:C477639	3-(5-methyl-2-(2-oxo-1,2-dihydroindol-3-ylidenemethyl)-1H-pyrrol-3-yl)propionic acid	CTD	4.179e-06	0.07008	9.968e-05	0.001027	2	2	FLT1,KDR
696	ctd:D002614	Chelating Agents	CTD	4.179e-06	0.07008	9.968e-05	0.001027	2	2	HIF1A,ACE
697	ctd:C478783	ZM323881	CTD	4.179e-06	0.07008	9.968e-05	0.001027	2	2	HIF1A,VEGFA
698	ctd:C066408	luteolin-7-glucoside	CTD	4.179e-06	0.07008	9.968e-05	0.001027	2	2	TNF,IL6
699	ctd:C534359	SMe1EC2	CTD	4.179e-06	0.07008	9.968e-05	0.001027	2	2	TNF,IL6
700	ctd:C080890	terpestacin	CTD	4.179e-06	0.07008	9.968e-05	0.001027	2	2	HIF1A,VEGFA
701	CID003050714	D 274	Stitch	4.179e-06	0.07008	9.968e-05	0.001027	2	2	IGF1,ANGPT1
702	ctd:C034837	technetium Tc 99m mebrofenin	CTD	4.179e-06	0.07008	9.968e-05	0.001027	2	2	TNF,IL6
703	ctd:C000511	cornin iridoid	CTD	4.179e-06	0.07008	9.968e-05	0.001027	2	2	FLT1,VEGFA
704	ctd:D011189	Potassium Chloride	CTD	4.246e-06	0.07119	0.0001011	0.001042	5	117	IGF1,F2,NOS3,PRL,BDNF
705	ctd:D015474	Isotretinoin	CTD	4.271e-06	0.07162	0.0001016	0.001047	10	799	ARG2,GSTP1,IGF1,NAMPT,CASP8,C3,CCL5,TNF,IL6,VEGFA
706	ctd:C004532	quinone	CTD	4.334e-06	0.07266	0.0001022	0.001053	4	53	KDR,CCL5,TNF,IL6
707	ctd:C016299	chelerythrine	CTD	4.334e-06	0.07266	0.0001022	0.001053	4	53	IGF1,TNF,NOS3,IL6
708	CID000656932	OH-H	Stitch	4.334e-06	0.07266	0.0001022	0.001053	4	53	EPO,HIF1A,EPAS1,VEGFA
709	CID000005038	CAS 87333-19-5	Stitch	4.334e-06	0.07266	0.0001022	0.001053	4	53	F2,ACE,NOS3,CYBA
710	ctd:C104536	xanthohumol	CTD	4.334e-06	0.07266	0.0001022	0.001053	4	53	GSTP1,CASP8,TNF,IL6
711	ctd:C019357	dioscin	CTD	4.334e-06	0.07266	0.0001022	0.001053	4	53	KDR,TNF,IL6,VEGFA
712	CID000000213	AC1L18QD	Stitch	4.363e-06	0.07315	0.0001027	0.001059	7	325	IGF1R,TNF,F2,ACE,NOS3,IL6,BDNF
713	CID000003032	diclofenac	Stitch	4.37e-06	0.07327	0.0001028	0.001059	6	209	HIF1A,TNF,NOS3,IL6,EPAS1,CYBA
714	ctd:C074212	bis(maltolato)oxovanadium(IV)	CTD	4.531e-06	0.07597	0.000106	0.001092	3	16	TNF,NOS3,IL6
715	ctd:C000594859	nymphayol	CTD	4.531e-06	0.07597	0.000106	0.001092	3	16	CASP8,TNF,IL6
716	ctd:C054105	ammonium trichloro(dioxoethylene-O,O'-)tellurate	CTD	4.531e-06	0.07597	0.000106	0.001092	3	16	CASP8,TNF,IL6
717	ctd:D009589	Nitrogen Oxides	CTD	4.531e-06	0.07597	0.000106	0.001092	3	16	GSTP1,CASP8,TNF
718	ctd:D010042	Ouabain	CTD	4.614e-06	0.07736	0.0001077	0.00111	5	119	HIF1A,ACE,NOS3,BDNF,LGALS1
719	CID000002661	AC1L1E6H	Stitch	4.673e-06	0.07836	0.0001088	0.001121	4	54	FLT1,CCL5,TNF,NOS3
720	ctd:D020058	Styrene	CTD	4.673e-06	0.07836	0.0001088	0.001121	4	54	GSTP1,CASP8,TNF,IL6
721	ctd:C020972	pyrrolidine dithiocarbamic acid	CTD	4.873e-06	0.08171	0.0001132	0.001166	6	213	CASP8,CCL5,TNF,ATF4,IL6,BDNF
722	CID000010964	malondialdehyde	Stitch	4.873e-06	0.08171	0.0001132	0.001166	6	213	EPO,TNF,F2,ACE,NOS3,IL6
723	CID000000899	N-acetylhexosamine	Stitch	4.974e-06	0.0834	0.0001154	0.001189	8	472	IGF1R,HLA-DRB1,C3,TNF,C5,ACE,F5,LGALS1
724	CID000492400	NVP & EFV	Stitch	5.007e-06	0.08395	0.000116	0.001195	5	121	FLT1,IGF1,IGF1R,KDR,IHH
725	ctd:D016912	Levonorgestrel	CTD	5.142e-06	0.08621	0.0001189	0.001225	6	215	IGF1,MALAT1,C3,TNF,F5,VEGFA
726	ctd:D009285	Naphthoquinones	CTD	5.219e-06	0.0875	0.0001205	0.001242	7	334	NAMPT,MALAT1,CASP8,TNF,IL6,LGALS1,VEGFA
727	CID000004534	NDGA	Stitch	5.28e-06	0.08853	0.0001218	0.001255	6	216	IGF1,IGF1R,TNF,F2,NOS3,PRL
728	ctd:D014284	Triiodothyronine	CTD	5.374e-06	0.0901	0.0001238	0.001275	8	477	GSTP1,HIF1A,IGF1,CCL5,TNF,ACE,PRL,EPAS1
729	ctd:D004492	Edetic Acid	CTD	5.411e-06	0.09073	0.0001241	0.001279	4	56	ACE,IL6,PRL,VEGFA
730	CID000108018	N-chlorotaurine	Stitch	5.411e-06	0.09073	0.0001241	0.001279	4	56	CASP8,TNF,F5,IL6
731	CID000479504	methylenedisalicylic acid	Stitch	5.411e-06	0.09073	0.0001241	0.001279	4	56	HLA-A,HLA-B,HLA-DRB1,TNF
732	ctd:D016718	Arachidonic Acid	CTD	5.422e-06	0.09091	0.0001241	0.001279	6	217	EPHX2,CASP8,TNF,IL6,BDNF,VEGFA
733	CID000006238	17-hydroxyprogesterone	Stitch	5.425e-06	0.09097	0.0001241	0.001279	5	123	IGF1,HLA-A,HLA-B,IL6,PRL
734	CID000159403	ceramic fibres	Stitch	5.494e-06	0.09212	0.0001242	0.001279	3	17	CCL5,TNF,IL6
735	ctd:C090577	N,N'-bis(salicylideneamino)ethane-manganese(II)	CTD	5.494e-06	0.09212	0.0001242	0.001279	3	17	IGF1,NOS3,IL6
736	ctd:C040918	butein	CTD	5.494e-06	0.09212	0.0001242	0.001279	3	17	TNF,ACE,VEGFA
737	ctd:D003871	Dermatan Sulfate	CTD	5.494e-06	0.09212	0.0001242	0.001279	3	17	F2,BDNF,VEGFA
738	ctd:C559087	SR 1078	CTD	5.494e-06	0.09212	0.0001242	0.001279	3	17	TNF,ATF4,IL6
739	ctd:C009540	triclocarban	CTD	5.494e-06	0.09212	0.0001242	0.001279	3	17	EPHX2,TNF,IL6
740	ctd:C067172	zopolrestat	CTD	5.494e-06	0.09212	0.0001242	0.001279	3	17	CCL5,TNF,IL6
741	ctd:D006388	Hemagglutinins	CTD	5.494e-06	0.09212	0.0001242	0.001279	3	17	CCL5,TNF,IL6
742	CID000036354	alinidine	Stitch	5.494e-06	0.09212	0.0001242	0.001279	3	17	ANGPT1,ANGPT2,VEGFA
743	CID000019920	LS109	Stitch	5.641e-06	0.09459	0.0001272	0.001311	7	338	HLA-A,HLA-B,C3,CCL5,TNF,IL6,VEGFA
744	ctd:D016686	Monocrotaline	CTD	5.645e-06	0.09464	0.0001272	0.001311	5	124	CCL5,TNF,NOS3,IL6,VEGFA
745	ctd:C007262	deoxynivalenol	CTD	5.712e-06	0.09578	0.0001286	0.001325	8	481	SEMA3A,HIF1A,IGF1,CASP8,C3,CCL5,TNF,IL6
746	ctd:C042986	ebselen	CTD	5.811e-06	0.09743	0.0001304	0.001344	4	57	EPHX2,GSTP1,HIF1A,NOS3
747	ctd:C473478	sunitinib	CTD	5.811e-06	0.09743	0.0001304	0.001344	4	57	FLT1,KDR,IL6,VEGFA
748	CID000005090	rofecoxib	Stitch	5.871e-06	0.09843	0.0001314	0.001354	5	125	ANGPT1,TNF,TEAD4,IL6,VEGFA
749	CID000193758	valienamine	Stitch	5.871e-06	0.09843	0.0001314	0.001354	5	125	TNF,F2,ACE,IL6,PRL
750	ctd:D024483	Vitamin K 3	CTD	6.151e-06	0.1031	0.0001375	0.001417	12	1249	ARG2,FZD4,EPO,HIF1A,IGF1R,CCL5,TNF,TEAD4,NOS3,IL6,EPAS1,CYBA
751	ctd:D008055	Lipids	CTD	6.232e-06	0.1045	0.0001384	0.001426	4	58	IGF1,TNF,NOS3,IL6
752	CID000177236	darusentan	Stitch	6.232e-06	0.1045	0.0001384	0.001426	4	58	EPO,ACE,NOS3,VEGFA
753	CID000010908	tert-butyl acetate	Stitch	6.232e-06	0.1045	0.0001384	0.001426	4	58	HLA-A,HLA-B,MTHFR,TNF
754	ctd:C070417	Win 55212-2	CTD	6.232e-06	0.1045	0.0001384	0.001426	4	58	KDR,TNF,IL6,VEGFA
755	ctd:C025946	3-methyladenine	CTD	6.232e-06	0.1045	0.0001384	0.001426	4	58	HIF1A,IGF1,CASP8,TNF
756	ctd:C004742	daidzein	CTD	6.339e-06	0.1063	0.0001405	0.001448	6	223	IGF1R,C3,TNF,NOS3,IL6,PRL
757	ctd:D002793	Cholic Acids	CTD	6.344e-06	0.1064	0.0001405	0.001448	5	127	LRP5,C3,ATF4,C5,F5
758	ctd:D008770	Methylnitrosourea	CTD	6.45e-06	0.1081	0.0001427	0.00147	7	345	IGF1,IGF1R,CASP8,CCL5,TNF,BDNF,VEGFA
759	ctd:D017879	Isothiocyanates	CTD	6.583e-06	0.1104	0.0001441	0.001485	3	18	GSTP1,TNF,IL6
760	CID000150847	6-formylpterin	Stitch	6.583e-06	0.1104	0.0001441	0.001485	3	18	HIF1A,CASP8,NOS3
761	ctd:C076852	terameprocol	CTD	6.583e-06	0.1104	0.0001441	0.001485	3	18	CCL5,TNF,IL6
762	CID000219104	PX-12	Stitch	6.583e-06	0.1104	0.0001441	0.001485	3	18	HIF1A,EPAS1,VEGFA
763	ctd:C433247	Cilomilast	CTD	6.583e-06	0.1104	0.0001441	0.001485	3	18	CCL5,TNF,IL6
764	CID000120356	fluorbenzotef	Stitch	6.583e-06	0.1104	0.0001441	0.001485	3	18	IGF1,HLA-A,NOS3
765	ctd:C035276	eicosapentaenoic acid ethyl ester	CTD	6.583e-06	0.1104	0.0001441	0.001485	3	18	CCL5,F2,F5
766	ctd:D022641	Shiga Toxin 2	CTD	6.583e-06	0.1104	0.0001441	0.001485	3	18	CCL5,TNF,IL6
767	ctd:D030421	Peroxynitrous Acid	CTD	6.675e-06	0.1119	0.000145	0.001494	4	59	TNF,NOS3,IL6,BDNF
768	ctd:D004176	Dipyridamole	CTD	6.675e-06	0.1119	0.000145	0.001494	4	59	CASP8,TNF,IL6,VEGFA
769	ctd:C490266	neoechinulin A	CTD	6.675e-06	0.1119	0.000145	0.001494	4	59	C3,CCL5,TNF,IL6
770	ctd:D000241	Adenosine	CTD	6.675e-06	0.1119	0.000145	0.001494	4	59	HIF1A,CASP8,TNF,VEGFA
771	CID006327264	thioxoboron	Stitch	6.675e-06	0.1119	0.000145	0.001494	4	59	EPO,HIF1A,LGALS1,VEGFA
772	ctd:D009585	Nitrogen Dioxide	CTD	6.675e-06	0.1119	0.000145	0.001494	4	59	GSTP1,TNF,NOS3,IL6
773	CID000004585	olanzapine	Stitch	6.847e-06	0.1148	0.0001483	0.001528	5	129	MTHFR,C3,PRL,BDNF,VEGFA
774	ctd:D008774	Methylphenidate	CTD	6.847e-06	0.1148	0.0001483	0.001528	5	129	VASH1,MALAT1,TNF,IL6,BDNF
775	ctd:D017636	Asbestos, Amphibole	CTD	7.381e-06	0.1238	0.0001595	0.001643	5	131	EPHX2,CASP8,C3,TNF,IL6
776	ctd:D019800	Phenol	CTD	7.381e-06	0.1238	0.0001595	0.001643	5	131	LRP5,CASP8,TNF,IL6,CYBA
777	ctd:D008767	Methylmercury Compounds	CTD	7.443e-06	0.1248	0.0001606	0.001655	10	851	GSTP1,FLT1,KDR,TNF,ATF4,F2,NOS3,IL6,BDNF,VEGFA
778	CID000003475	gliclazide	Stitch	7.63e-06	0.1279	0.0001632	0.001682	4	61	TNF,ACE,NOS3,IL6
779	CID006321294	GHRP	Stitch	7.63e-06	0.1279	0.0001632	0.001682	4	61	IGF1,IGF1R,IL6,PRL
780	ctd:C032688	boric acid	CTD	7.63e-06	0.1279	0.0001632	0.001682	4	61	TNF,ATF4,ACE,IL6
781	CID000018514	Disperse Blue 7	Stitch	7.63e-06	0.1279	0.0001632	0.001682	4	61	EPHX2,IGF1,PRL,LGALS1
782	ctd:D064747	Lansoprazole	CTD	7.63e-06	0.1279	0.0001632	0.001682	4	61	GSTP1,CASP8,TNF,IL6
783	ctd:C010615	Nonidet P-40	CTD	7.63e-06	0.1279	0.0001632	0.001682	4	61	EPO,ATF4,IL6,VEGFA
784	ctd:D012503	Saponins	CTD	7.63e-06	0.1279	0.0001632	0.001682	4	61	HIF1A,TNF,NOS3,IL6
785	CID000003640	AC1Q5HK6	Stitch	7.692e-06	0.129	0.0001643	0.001693	8	501	IGF1,TNF,ACE,NOS3,IL6,PRL,LGALS1,VEGFA
786	ctd:D016285	Iloprost	CTD	7.806e-06	0.1309	0.0001659	0.001709	3	19	ANGPT1,ANGPT2,IL6
787	CID000003826	ketorolac	Stitch	7.806e-06	0.1309	0.0001659	0.001709	3	19	HIF1A,LRP5,EPAS1
788	ctd:C029217	phenyl-N-tert-butylnitrone	CTD	7.806e-06	0.1309	0.0001659	0.001709	3	19	C3,C5,CYBA
789	ctd:D047188	Chalcones	CTD	7.806e-06	0.1309	0.0001659	0.001709	3	19	TNF,ACE,IL6
790	CID000461545	AGEPC	Stitch	7.914e-06	0.1327	0.000168	0.001731	7	356	HLA-A,CCL5,TNF,F2,ACE,IL6,VEGFA
791	ctd:D004917	Erythromycin	CTD	8.144e-06	0.1366	0.0001716	0.001768	4	62	HLA-A,HLA-B,TNF,IL6
792	CID000005005	AC1Q641C	Stitch	8.144e-06	0.1366	0.0001716	0.001768	4	62	ACE,NOS3,IL6,CYBA
793	ctd:C439060	sirtinol	CTD	8.144e-06	0.1366	0.0001716	0.001768	4	62	IGF1R,TNF,VEGFA,CYBA
794	CID000047326	fenpropathrin	Stitch	8.144e-06	0.1366	0.0001716	0.001768	4	62	HIF1A,TNF,F2,EPAS1
795	ctd:D007464	Clioquinol	CTD	8.144e-06	0.1366	0.0001716	0.001768	4	62	EPO,HIF1A,MIR223,VEGFA
796	ctd:D010713	Phosphatidylcholines	CTD	8.144e-06	0.1366	0.0001716	0.001768	4	62	IGF1,CASP8,TNF,IL6
797	CID000000723	2-butenedioate	Stitch	8.346e-06	0.1399	0.0001756	0.001809	6	234	ARG2,HIF1A,C3,TNF,NOS3,CYBA
798	ctd:D013196	Dihydrotestosterone	CTD	8.511e-06	0.1427	0.0001788	0.001843	7	360	IGF1,IGF1R,TNF,ATF4,IL6,PRL,VEGFA
799	CID000004701	AC1Q5V5T	Stitch	8.546e-06	0.1433	0.0001791	0.001846	5	135	ANGPT1,ANGPT2,ACE,NOS3,VEGFA
800	ctd:C419708	gefitinib	CTD	8.546e-06	0.1433	0.0001791	0.001846	5	135	IGF1R,HLA-DRB1,KDR,TNF,VEGFA
801	CID000000206	sodium chloride	Stitch	8.586e-06	0.144	0.0001797	0.001852	10	865	IGF1R,HLA-A,C3,CCL5,TNF,F2,ACE,NOS3,BDNF,LGALS1
802	ctd:D010654	Phenylbutyrates	CTD	8.683e-06	0.1456	0.0001811	0.001866	4	63	KDR,TNF,MIR223,IL6
803	CID005281807	puerarin	Stitch	8.683e-06	0.1456	0.0001811	0.001866	4	63	HIF1A,KDR,NOS3,VEGFA
804	CID005281703	wogonin	Stitch	8.683e-06	0.1456	0.0001811	0.001866	4	63	FLT1,KDR,TNF,IL6
805	CID000004889	AC1L1J6H	Stitch	8.761e-06	0.1469	0.0001825	0.00188	6	236	TNF,F2,ACE,NOS3,IL6,VEGFA
806	ctd:D004391	Dust	CTD	8.975e-06	0.1505	0.0001865	0.001922	6	237	NAMPT,HLA-A,CCL5,TNF,IL6,VEGFA
807	CID000003514	AC1L1G3W	Stitch	8.975e-06	0.1505	0.0001865	0.001922	6	237	GSTP1,HIF1A,HLA-A,CCL5,TNF,NOS3
808	ctd:D007978	Levamisole	CTD	9.171e-06	0.1538	0.0001898	0.001956	3	20	TNF,NOS3,IL6
809	CID006604927	methyl-piperidino-pyrazole	Stitch	9.171e-06	0.1538	0.0001898	0.001956	3	20	C3,IHH,NOS3
810	ctd:D002911	Chrysenes	CTD	9.171e-06	0.1538	0.0001898	0.001956	3	20	CCL5,NOS3,VEGFA
811	ctd:C090942	4-(4-fluorophenyl)-2-(4-hydroxyphenyl)-5-(4-pyridyl)imidazole	CTD	9.18e-06	0.1539	0.0001898	0.001956	5	137	HIF1A,ANGPT1,TNF,IL6,VEGFA
812	CID006400050	D2926_SIGMA	Stitch	9.248e-06	0.1551	0.0001905	0.001963	4	64	HIF1A,IGF1R,NOS3,CYBA
813	CID006011258	chrysamine	Stitch	9.248e-06	0.1551	0.0001905	0.001963	4	64	IGF1,CASP8,IL6,BDNF
814	ctd:D000728	Androgens	CTD	9.248e-06	0.1551	0.0001905	0.001963	4	64	C3,TNF,IL6,BDNF
815	ctd:D004298	Dopamine	CTD	9.642e-06	0.1617	0.0001984	0.002044	6	240	GSTP1,HIF1A,TNF,PRL,BDNF,VEGFA
816	ctd:D002939	Ciprofloxacin	CTD	9.84e-06	0.165	0.0002022	0.002083	4	65	HLA-DRB1,CASP8,TNF,IL6
817	ctd:C039671	ciglitazone	CTD	9.872e-06	0.1655	0.0002026	0.002088	6	241	HIF1A,CASP8,CCL5,IL6,EPAS1,VEGFA
818	CID000039042	bezafibrate	Stitch	1.011e-05	0.1695	0.0002072	0.002135	6	242	CCL5,TNF,F2,F5,NOS3,CYBA
819	ctd:D015215	Zidovudine	CTD	1.022e-05	0.1714	0.0002093	0.002157	8	521	EPO,HLA-A,HLA-B,CASP8,TNF,NOS3,IL6,LGALS1
820	ctd:D004002	Clodronic Acid	CTD	1.035e-05	0.1735	0.0002113	0.002178	6	243	TSPAN12,HIF1A,IGF1R,TNF,ATF4,IL6
821	ctd:C080163	trovafloxacin	CTD	1.035e-05	0.1735	0.0002113	0.002178	7	371	NAA15,HLA-A,CASP8,TNF,F2,IL6,VEGFA
822	ctd:C064769	N-acetylsphingosine	CTD	1.046e-05	0.1754	0.0002126	0.00219	4	66	CASP8,KDR,TNF,VEGFA
823	ctd:D014280	Triglycerides	CTD	1.046e-05	0.1754	0.0002126	0.00219	4	66	C3,TNF,NOS3,IL6
824	ctd:D000493	Allopurinol	CTD	1.046e-05	0.1754	0.0002126	0.00219	4	66	HLA-B,TNF,NOS3,IL6
825	CID003081884	copolymer 1	Stitch	1.046e-05	0.1754	0.0002126	0.00219	4	66	HLA-DRB1,CCL5,TNF,BDNF
826	ctd:D012460	Sulfasalazine	CTD	1.056e-05	0.177	0.0002143	0.002208	5	141	GSTP1,HIF1A,MTHFR,TNF,IL6
827	CID000005978	indole alkaloid	Stitch	1.059e-05	0.1776	0.0002143	0.002208	6	244	ARG2,GSTP1,HIF1A,CASP8,TNF,IL6
828	CID000001083	S-D-lactoylglutathione	Stitch	1.068e-05	0.1791	0.0002143	0.002208	3	21	HLA-A,HLA-B,MTHFR
829	ctd:C090937	3-(5'-hydroxymethyl-2'-furyl)-1-benzylindazole	CTD	1.068e-05	0.1791	0.0002143	0.002208	3	21	EPO,HIF1A,VEGFA
830	ctd:D020910	Ketorolac	CTD	1.068e-05	0.1791	0.0002143	0.002208	3	21	HIF1A,HLA-A,EPAS1
831	CID003016734	taurine bromamine	Stitch	1.068e-05	0.1791	0.0002143	0.002208	3	21	ARG2,TNF,IL6
832	ctd:C442759	ginsenoside Rb1	CTD	1.068e-05	0.1791	0.0002143	0.002208	3	21	IGF1,TNF,IL6
833	ctd:C054218	manidipine	CTD	1.068e-05	0.1791	0.0002143	0.002208	3	21	ACE,NOS3,CYBA
834	CID000003015	AC-6213	Stitch	1.068e-05	0.1791	0.0002143	0.002208	3	21	IGF1,F2,PRL
835	ctd:C526689	punarnavine	CTD	1.068e-05	0.1791	0.0002143	0.002208	3	21	TNF,IL6,VEGFA
836	ctd:C120099	GW 1929	CTD	1.068e-05	0.1791	0.0002143	0.002208	3	21	CCL5,TNF,VEGFA
837	CID000004246	AC1L1HQG	Stitch	1.093e-05	0.1832	0.0002186	0.002253	5	142	ANGPT1,TNF,ACE,NOS3,IL6
838	CID005281708	daidzein	Stitch	1.093e-05	0.1832	0.0002186	0.002253	5	142	IGF1R,CASP8,C3,TNF,NOS3
839	ctd:D017035	Pravastatin	CTD	1.111e-05	0.1862	0.000222	0.002287	4	67	TNF,NOS3,IL6,CYBA
840	ctd:C015329	lycopene	CTD	1.131e-05	0.1896	0.0002254	0.002323	5	143	IGF1,IGF1R,CASP8,TNF,IL6
841	ctd:C013592	mangiferin	CTD	1.131e-05	0.1896	0.0002254	0.002323	5	143	C3,CCL5,TNF,IL6,VEGFA
842	ctd:C012843	cinnamic aldehyde	CTD	1.135e-05	0.1904	0.0002261	0.00233	6	247	GSTP1,CASP8,CCL5,TNF,IL6,EPAS1
843	CID000119031	marimastat	Stitch	1.178e-05	0.1976	0.0002341	0.002412	4	68	KDR,TNF,ACE,VEGFA
844	CID000071306	Vapreotide	Stitch	1.178e-05	0.1976	0.0002341	0.002412	4	68	IGF1,IGF1R,PRL,VEGFA
845	CID000066420	estradiol-17 beta benzoate	Stitch	1.235e-05	0.2071	0.0002369	0.002441	3	22	IGF1,IGF1R,NOS3
846	ctd:C045989	eticlopride	CTD	1.235e-05	0.2071	0.0002369	0.002441	3	22	HIF1A,TNF,VEGFA
847	ctd:C488288	2,5,7,8-tetramethyl-2R-(4R,8R,12-trimethyltridecyl)chroman-6-yloxy acetic acid	CTD	1.235e-05	0.2071	0.0002369	0.002441	3	22	CASP8,KDR,VEGFA
848	ctd:C108475	pitavastatin	CTD	1.235e-05	0.2071	0.0002369	0.002441	3	22	TNF,NOS3,IL6
849	ctd:D010743	Phospholipids	CTD	1.235e-05	0.2071	0.0002369	0.002441	3	22	CCL5,TNF,F2
850	CID000072495	squalamine	Stitch	1.235e-05	0.2071	0.0002369	0.002441	3	22	KDR,IHH,VEGFA
851	ctd:D011803	Quinine	CTD	1.235e-05	0.2071	0.0002369	0.002441	3	22	GSTP1,TNF,IL6
852	ctd:D017313	Fenretinide	CTD	1.244e-05	0.2085	0.0002369	0.002441	6	251	IGF1,CASP8,TNF,ATF4,IL6,VEGFA
853	CID000220862	NSC4322	Stitch	1.249e-05	0.2094	0.0002369	0.002441	4	69	IGF1,IGF1R,F2,F5
854	ctd:D008743	Methyl Parathion	CTD	1.249e-05	0.2094	0.0002369	0.002441	4	69	ARG2,TNF,IL6,BDNF
855	ctd:C041667	vesnarinone	CTD	1.25e-05	0.2095	0.0002369	0.002441	2	3	TNF,IL6
856	ctd:C471035	martentoxin, Buthus martensi	CTD	1.25e-05	0.2095	0.0002369	0.002441	2	3	TNF,NOS3
857	ctd:C077910	margatoxin	CTD	1.25e-05	0.2095	0.0002369	0.002441	2	3	TNF,IL6
858	ctd:C583916	1-(4-ethoxyphenyl)-3-(4-nitrophenyl)-prop-2-en-1-one	CTD	1.25e-05	0.2095	0.0002369	0.002441	2	3	TNF,IL6
859	ctd:C111427	silicon titanium dioxide	CTD	1.25e-05	0.2095	0.0002369	0.002441	2	3	TNF,IL6
860	CID000519872	santolinatriene	Stitch	1.25e-05	0.2095	0.0002369	0.002441	2	3	TNF,IL6
861	ctd:C570631	dichlorido-zinc(II)-4-(2-(5-methoxybenzylideneamino)ethyl)piperazin-1-iumphenolate	CTD	1.25e-05	0.2095	0.0002369	0.002441	2	3	TNF,IL6
862	ctd:C524539	NCX 6560	CTD	1.25e-05	0.2095	0.0002369	0.002441	2	3	TNF,NOS3
863	ctd:C501588	6-O-carboxypropyl-alpha-tocotrienol	CTD	1.25e-05	0.2095	0.0002369	0.002441	2	3	EPAS1,VEGFA
864	ctd:C029353	xyloglucan	CTD	1.25e-05	0.2095	0.0002369	0.002441	2	3	TNF,IL6
865	ctd:C029351	4-vinylpyridine	CTD	1.25e-05	0.2095	0.0002369	0.002441	2	3	GSTP1,TNF
866	ctd:D003707	Demeclocycline	CTD	1.25e-05	0.2095	0.0002369	0.002441	2	3	TNF,IL6
867	ctd:D063388	Endocannabinoids	CTD	1.25e-05	0.2095	0.0002369	0.002441	2	3	TNF,IL6
868	ctd:C029498	2,3-bis(3'-hydroxybenzyl)butane-1,4-diol	CTD	1.25e-05	0.2095	0.0002369	0.002441	2	3	KDR,VEGFA
869	ctd:C077313	T 614	CTD	1.25e-05	0.2095	0.0002369	0.002441	2	3	TNF,IL6
870	ctd:C539676	rEV576 protein, tick	CTD	1.25e-05	0.2095	0.0002369	0.002441	2	3	C3,C5
871	ctd:D012765	Shikimic Acid	CTD	1.25e-05	0.2095	0.0002369	0.002441	2	3	IGF1,VEGFA
872	ctd:C503350	Shi-Bi-Lin herbal formula	CTD	1.25e-05	0.2095	0.0002369	0.002441	2	3	TNF,IL6
873	ctd:C034532	camostat	CTD	1.25e-05	0.2095	0.0002369	0.002441	2	3	TNF,NOS3
874	ctd:C417083	peginterferon alfa-2b	CTD	1.25e-05	0.2095	0.0002369	0.002441	2	3	EPO,IL6
875	ctd:C082486	13-hydroxy-10-oxo-11-octadecenoic acid	CTD	1.25e-05	0.2095	0.0002369	0.002441	2	3	TNF,VEGFA
876	ctd:C526426	calycosin-7-O-beta-D-glucoside	CTD	1.25e-05	0.2095	0.0002369	0.002441	2	3	EPO,HIF1A
877	ctd:C095905	ZD 7155	CTD	1.25e-05	0.2095	0.0002369	0.002441	2	3	TNF,IL6
878	ctd:C021828	Revalor	CTD	1.25e-05	0.2095	0.0002369	0.002441	2	3	IGF1,IGF1R
879	ctd:C405442	2-methoxyoestrone-3-O-sulphamate	CTD	1.25e-05	0.2095	0.0002369	0.002441	2	3	TNF,IL6
880	ctd:C494243	indapamide, perindopril drug combination	CTD	1.25e-05	0.2095	0.0002369	0.002441	2	3	NOS3,VEGFA
881	ctd:C505499	eutigoside C	CTD	1.25e-05	0.2095	0.0002369	0.002441	2	3	TNF,IL6
882	ctd:C060152	tyrphostin 47	CTD	1.25e-05	0.2095	0.0002369	0.002441	2	3	IGF1R,NOS3
883	ctd:C407360	7-chloro-3-imino-5-methyl-2-azabicyclo(4.1.0)heptane	CTD	1.25e-05	0.2095	0.0002369	0.002441	2	3	TNF,IL6
884	ctd:C506836	N'-(2-phenylallyl)hydrazine	CTD	1.25e-05	0.2095	0.0002369	0.002441	2	3	TNF,IL6
885	CID000066644	salicylhydroxamic acid	Stitch	1.25e-05	0.2096	0.0002369	0.002441	5	146	EPO,IGF1,TNF,IL6,PRL
886	CID000023925	Fe(III	Stitch	1.273e-05	0.2134	0.0002408	0.002482	8	537	GSTP1,EPO,HIF1A,HLA-A,C3,TNF,NOS3,CYBA
887	ctd:C024629	dimethyl phthalate	CTD	1.307e-05	0.2192	0.0002471	0.002546	9	714	GSTP1,FLT1,IGF1,ANGPT2,MTHFR,C3,SUCNR1,NOS3,BDNF
888	CID000206042	SU6668	Stitch	1.323e-05	0.2218	0.0002489	0.002565	4	70	FLT1,ANGPT1,KDR,VEGFA
889	ctd:C007845	gingerol	CTD	1.323e-05	0.2218	0.0002489	0.002565	4	70	HIF1A,CASP8,TNF,IL6
890	CID000014025	A 172	Stitch	1.323e-05	0.2218	0.0002489	0.002565	4	70	FZD4,CASP8,TNF,IL6
891	ctd:C524042	3,5-bis(2-fluorobenzylidene)piperidin-4-one	CTD	1.323e-05	0.2218	0.0002489	0.002565	4	70	HIF1A,CASP8,TNF,NOS3
892	ctd:D010081	Oxazolone	CTD	1.36e-05	0.2281	0.0002557	0.002635	6	255	ARG2,NAMPT,HLA-B,TNF,IL6,VEGFA
893	CID000004042	A19457	Stitch	1.38e-05	0.2313	0.0002588	0.002666	5	149	IGF1,ANGPT1,IL6,PRL,VEGFA
894	CID000114813	AC1Q5H8E	Stitch	1.38e-05	0.2313	0.0002588	0.002666	5	149	EPO,IGF1,IGF1R,TNF,PRL
895	CID000003750	AC1L7AJI	Stitch	1.391e-05	0.2332	0.0002606	0.002685	6	256	GSTP1,FLT1,IGF1,MTHFR,CASP8,VEGFA
896	CID000007994	PA-e	Stitch	1.399e-05	0.2346	0.0002619	0.002698	4	71	FLT1,KDR,BDNF,VEGFA
897	CID000001104	(2S,3R)-Sphingosine	Stitch	1.406e-05	0.2357	0.0002628	0.002708	7	389	IGF1,HLA-A,CASP8,C3,TNF,F2,IL6
898	ctd:C007590	emulphogene BC 720	CTD	1.419e-05	0.2378	0.0002628	0.002708	3	23	EPO,TNF,IL6
899	ctd:C029036	crocin	CTD	1.419e-05	0.2378	0.0002628	0.002708	3	23	TNF,IL6,BDNF
900	ctd:D015777	Eicosanoids	CTD	1.419e-05	0.2378	0.0002628	0.002708	3	23	EPHX2,TNF,IL6
901	ctd:C080669	5,7-dihydroxy-6-methoxy-2-phenylchromen-4-one	CTD	1.419e-05	0.2378	0.0002628	0.002708	3	23	CASP8,TNF,IL6
902	ctd:D012430	Ruthenium Red	CTD	1.419e-05	0.2378	0.0002628	0.002708	3	23	IGF1,IL6,VEGFA
903	ctd:C043055	gallium arsenide	CTD	1.419e-05	0.2378	0.0002628	0.002708	3	23	CCL5,TNF,IL6
904	CID001356208	AC1LXO3B	Stitch	1.419e-05	0.2378	0.0002628	0.002708	3	23	IGF1,IHH,IL6
905	ctd:D019297	2,4-Dinitrophenol	CTD	1.419e-05	0.2378	0.0002628	0.002708	3	23	HIF1A,NOS3,EPAS1
906	ctd:C532162	2-(1H-indazol-4-yl)-6-(4-methanesulfonylpiperazin-1-ylmethyl)-4-morpholin-4-ylthieno(3,2-d)pyrimidine	CTD	1.435e-05	0.2406	0.0002655	0.002736	8	546	TSPAN12,HIF1A,IGF1,MALAT1,TNF,IL6,EPAS1,VEGFA
907	ctd:D007213	Indomethacin	CTD	1.475e-05	0.2473	0.0002727	0.00281	13	1605	EPO,IGF1,IGF1R,ANGPT2,SCG3,CASP8,CCL5,TNF,ACE,NOS3,IL6,PRL,VEGFA
908	CID000005152	salmeterol	Stitch	1.48e-05	0.2481	0.0002732	0.002815	4	72	CCL5,TNF,ACE,IL6
909	ctd:D005419	Flavonoids	CTD	1.497e-05	0.251	0.0002761	0.002845	11	1135	EPHX2,GSTP1,FLT1,IGF1,SCG3,LRP5,CCL5,TNF,ACE,IL6,CYBA
910	CID000449244	1yei	Stitch	1.563e-05	0.2621	0.000288	0.002967	4	73	EPO,C3,TNF,VEGFA
911	ctd:C063002	2,3-dimethoxy-1,4-naphthoquinone	CTD	1.568e-05	0.2629	0.0002883	0.002971	5	153	HIF1A,TNF,ATF4,F5,LGALS1
912	CID000002224	arachidonic acid trifluoromethyl ketone	Stitch	1.568e-05	0.2629	0.0002883	0.002971	5	153	TNF,F2,NOS3,VEGFA,CYBA
913	ctd:C029010	cinnamic acid	CTD	1.619e-05	0.2714	0.0002959	0.003049	3	24	TNF,NOS3,IL6
914	CID011840937	D FE	Stitch	1.619e-05	0.2714	0.0002959	0.003049	3	24	HIF1A,HLA-B,MTHFR
915	ctd:C041376	rosmarinic acid	CTD	1.619e-05	0.2714	0.0002959	0.003049	3	24	TNF,NOS3,IL6
916	ctd:D056604	Grape Seed Extract	CTD	1.619e-05	0.2714	0.0002959	0.003049	3	24	TNF,IL6,VEGFA
917	ctd:C458508	T 0070907	CTD	1.619e-05	0.2714	0.0002959	0.003049	3	24	EPHX2,TNF,IL6
918	ctd:D019319	Okadaic Acid	CTD	1.62e-05	0.2717	0.0002959	0.003049	6	263	GSTP1,IGF1,MALAT1,CASP8,TNF,VEGFA
919	CID000002508	C8-ceramide	Stitch	1.635e-05	0.2742	0.0002983	0.003074	8	556	GSTP1,IGF1,CASP8,C3,TNF,NOS3,IL6,BDNF
920	ctd:C011272	perfosfamide	CTD	1.65e-05	0.2766	0.0003007	0.003098	4	74	HIF1A,TNF,EPAS1,VEGFA
921	CID000004553	NS-398	Stitch	1.655e-05	0.2775	0.0003014	0.003105	6	264	HIF1A,CASP8,TNF,NOS3,IL6,VEGFA
922	CID000005279	NSC618487	Stitch	1.657e-05	0.2779	0.0003014	0.003106	10	933	EPO,IGF1,CASP8,KDR,TNF,F2,NOS3,IL6,PRL,BDNF
923	CID000073665	prochloraz	Stitch	1.67e-05	0.28	0.0003033	0.003126	5	155	IGF1,ANGPT2,F2,NOS3,BDNF
924	ctd:C089032	rimonabant	CTD	1.691e-05	0.2835	0.0003069	0.003162	6	265	HIF1A,IGF1,TNF,PRL,BDNF,VEGFA
925	CID000005102	NSC115907	Stitch	1.727e-05	0.2896	0.0003131	0.003226	6	266	GSTP1,HIF1A,CASP8,TNF,VEGFA,CYBA
926	ctd:D004139	Dinitrofluorobenzene	CTD	1.74e-05	0.2918	0.0003137	0.003233	4	75	ARG2,NAMPT,CCL5,TNF
927	CID000667490	6-mercaptopurine	Stitch	1.74e-05	0.2918	0.0003137	0.003233	4	75	GSTP1,HIF1A,MTHFR,IL6
928	ctd:C040015	myricetin	CTD	1.74e-05	0.2918	0.0003137	0.003233	4	75	HIF1A,TNF,IL6,VEGFA
929	CID000016315	diallyl trisulfide	Stitch	1.74e-05	0.2918	0.0003137	0.003233	4	75	GSTP1,CASP8,KDR,TNF
930	ctd:C081021	Go 6976	CTD	1.74e-05	0.2918	0.0003137	0.003233	4	75	HIF1A,TNF,IL6,VEGFA
931	CID005281855	ellagic acid	Stitch	1.776e-05	0.2978	0.0003196	0.003293	5	157	HIF1A,CASP8,F2,NOS3,VEGFA
932	CID000000880	methylglyoxal	Stitch	1.776e-05	0.2978	0.0003196	0.003293	5	157	HLA-A,HLA-B,TNF,NOS3,IL6
933	CID000216239	sorafenib	Stitch	1.832e-05	0.3071	0.0003273	0.003373	5	158	FLT1,IGF1R,CASP8,KDR,VEGFA
934	CID000448538	AC1L9M2J	Stitch	1.834e-05	0.3075	0.0003273	0.003373	4	76	IGF1,C3,NOS3,PRL
935	ctd:C046488	trimethyltin	CTD	1.834e-05	0.3075	0.0003273	0.003373	4	76	HIF1A,IGF1,TNF,IL6
936	ctd:D002927	Cimetidine	CTD	1.834e-05	0.3075	0.0003273	0.003373	4	76	GSTP1,CASP8,TNF,PRL
937	ctd:D006834	Hydrazines	CTD	1.837e-05	0.308	0.0003273	0.003373	3	25	HIF1A,CCL5,ACE
938	ctd:D005907	Gliclazide	CTD	1.837e-05	0.308	0.0003273	0.003373	3	25	TNF,NOS3,IL6
939	ctd:C033643	3-nitrofluoranthene	CTD	1.837e-05	0.308	0.0003273	0.003373	3	25	CASP8,TNF,IL6
940	ctd:C469298	CEP-11004	CTD	1.837e-05	0.308	0.0003273	0.003373	3	25	TNF,ATF4,IL6
941	ctd:D011799	Quinazolines	CTD	1.837e-05	0.308	0.0003273	0.003373	3	25	KDR,TNF,IL6
942	CID000442783	AC1L9DEH	Stitch	1.931e-05	0.3237	0.0003427	0.003531	8	569	GSTP1,HIF1A,IGF1R,CASP8,TNF,NOS3,IL6,VEGFA
943	CID000414413	AC1L97MU	Stitch	1.932e-05	0.3239	0.0003427	0.003531	4	77	IGF1,CASP8,IL6,BDNF
944	CID000003269	16-epiestriol	Stitch	1.932e-05	0.3239	0.0003427	0.003531	4	77	TNF,NOS3,PRL,LGALS1
945	CID000004413	nafamostat mesilate	Stitch	1.932e-05	0.3239	0.0003427	0.003531	4	77	C3,F2,ACE,IL6
946	ctd:D015073	2-Acetylaminofluorene	CTD	1.941e-05	0.3255	0.0003441	0.003546	7	409	GSTP1,NAMPT,MTHFR,TNF,NOS3,IL6,VEGFA
947	CID000003440	furosemide	Stitch	1.959e-05	0.3285	0.0003468	0.003574	6	272	HLA-A,C3,C5,ACE,IL6,CYBA
948	ctd:C031721	naphthalene	CTD	1.972e-05	0.3306	0.0003488	0.003594	7	410	ARG2,EPHX2,GSTP1,IGF1,TNF,NOS3,LGALS1
949	CID000023978	copper	Stitch	1.98e-05	0.3319	0.0003498	0.003604	8	571	EPHX2,HIF1A,IGF1,HLA-A,TNF,F5,NOS3,IL6
950	ctd:D004281	Docosahexaenoic Acids	CTD	2.005e-05	0.3362	0.0003539	0.003647	5	161	HIF1A,CASP8,TNF,IL6,BDNF
951	ctd:D004280	Dobutamine	CTD	2.033e-05	0.3408	0.000358	0.003689	4	78	IGF1,TNF,IL6,VEGFA
952	ctd:C020326	ferric nitrilotriacetate	CTD	2.033e-05	0.3408	0.000358	0.003689	4	78	HIF1A,CASP8,TNF,IL6
953	CID005281605	baicalein	Stitch	2.066e-05	0.3464	0.0003614	0.003724	5	162	HIF1A,TNF,F2,NOS3,IL6
954	CID005283147	14,15-DHET	Stitch	2.073e-05	0.3477	0.0003614	0.003724	3	26	EPHX2,HIF1A,NOS3
955	ctd:D017257	Ramipril	CTD	2.073e-05	0.3477	0.0003614	0.003724	3	26	ACE,NOS3,CYBA
956	CID006918241	ONO-4007	Stitch	2.073e-05	0.3477	0.0003614	0.003724	3	26	TNF,NOS3,IL6
957	ctd:C007789	fucoidan	CTD	2.073e-05	0.3477	0.0003614	0.003724	3	26	CCL5,TNF,IL6
958	ctd:C492519	diarylpropionitrile	CTD	2.073e-05	0.3477	0.0003614	0.003724	3	26	TNF,IHH,NOS3
959	ctd:D011398	Promethazine	CTD	2.073e-05	0.3477	0.0003614	0.003724	3	26	HIF1A,TNF,IL6
960	CID000092326	stacker	Stitch	2.073e-05	0.3477	0.0003614	0.003724	3	26	FLT1,KDR,VEGFA
961	ctd:C063998	nodularin	CTD	2.073e-05	0.3477	0.0003614	0.003724	3	26	CASP8,TNF,ATF4
962	ctd:D008463	Mebendazole	CTD	2.073e-05	0.3477	0.0003614	0.003724	3	26	GSTP1,TNF,VEGFA
963	ctd:C004648	testosterone enanthate	CTD	2.081e-05	0.349	0.0003624	0.003734	8	575	HIF1A,IGF1,IGF1R,NAA15,ANGPT1,F2,PRL,CYBA
964	ctd:D004390	Chlorpyrifos	CTD	2.119e-05	0.3553	0.0003684	0.003796	10	960	ARG2,IGF1,SCG3,KDR,TNF,IL6,EPAS1,BDNF,LGALS1,VEGFA
965	CID000644213	GW9662	Stitch	2.128e-05	0.3568	0.0003684	0.003796	5	163	CASP8,TNF,NOS3,IL6,CYBA
966	ctd:D002166	Camptothecin	CTD	2.128e-05	0.3568	0.0003684	0.003796	5	163	GSTP1,CASP8,CCL5,LGALS1,VEGFA
967	ctd:D002185	Cannabidiol	CTD	2.128e-05	0.3568	0.0003684	0.003796	5	163	TNF,ATF4,IL6,BDNF,VEGFA
968	ctd:D010705	Phosgene	CTD	2.128e-05	0.3568	0.0003684	0.003796	5	163	ARG2,FLT1,NAA15,KDR,VEGFA
969	ctd:D001374	Azacitidine	CTD	2.131e-05	0.3574	0.0003684	0.003796	7	415	SEMA3A,CASP8,KDR,TNF,IL6,PRL,BDNF
970	CID000004485	nifedipine	Stitch	2.131e-05	0.3574	0.0003684	0.003796	7	415	TNF,F2,ACE,NOS3,PRL,LGALS1,VEGFA
971	ctd:D000450	Aldosterone	CTD	2.138e-05	0.3585	0.0003688	0.0038	4	79	GSTP1,ACE,IL6,PRL
972	CID009543487	C4 m	Stitch	2.138e-05	0.3585	0.0003688	0.0038	4	79	ARG2,TNF,F2,F5
973	ctd:D014750	Vincristine	CTD	2.184e-05	0.3662	0.0003763	0.003878	11	1182	GSTP1,FLT1,IGF1,NAMPT,APLN,CASP8,CCL5,TNF,F2,IL6,VEGFA
974	CID000521017	HPCs	Stitch	2.192e-05	0.3675	0.0003773	0.003888	5	164	EPO,FLT1,CCL5,IL6,BDNF
975	CID000013450	terbutryn	Stitch	2.247e-05	0.3768	0.0003857	0.003974	4	80	IGF1,CASP8,IL6,BDNF
976	ctd:D019819	Budesonide	CTD	2.247e-05	0.3768	0.0003857	0.003974	4	80	CCL5,TNF,IL6,VEGFA
977	CID000004518	DETA/NO	Stitch	2.247e-05	0.3768	0.0003857	0.003974	4	80	HIF1A,ANGPT1,NOS3,IL6
978	ctd:D006877	Hydroxamic Acids	CTD	2.329e-05	0.3906	0.0003929	0.004049	3	27	HIF1A,TNF,IL6
979	ctd:C448659	17-(dimethylaminoethylamino)-17-demethoxygeldanamycin	CTD	2.329e-05	0.3906	0.0003929	0.004049	3	27	HIF1A,TNF,IL6
980	CID003325224	dihydroxide	Stitch	2.329e-05	0.3906	0.0003929	0.004049	3	27	EPO,IGF1,ACE
981	ctd:C114438	cyanidin 3-O-glucoside	CTD	2.329e-05	0.3906	0.0003929	0.004049	3	27	HIF1A,TNF,IL6
982	CID006442261	SM-10906	Stitch	2.329e-05	0.3906	0.0003929	0.004049	3	27	TNF,F2,IL6
983	ctd:D002599	Chalcone	CTD	2.329e-05	0.3906	0.0003929	0.004049	3	27	CASP8,TNF,IL6
984	ctd:D000534	Alum Compounds	CTD	2.329e-05	0.3906	0.0003929	0.004049	3	27	CCL5,TNF,IL6
985	ctd:D000068759	Formoterol Fumarate	CTD	2.329e-05	0.3906	0.0003929	0.004049	3	27	CCL5,TNF,IL6
986	ctd:C010945	embelin	CTD	2.329e-05	0.3906	0.0003929	0.004049	3	27	KDR,NOS3,VEGFA
987	ctd:C057580	gallocatechol	CTD	2.329e-05	0.3906	0.0003929	0.004049	3	27	TNF,ACE,IL6
988	ctd:C008577	myricitrin	CTD	2.329e-05	0.3906	0.0003929	0.004049	3	27	TNF,NOS3,IL6
989	ctd:C061282	2-(4-(2-carboxyethyl)phenethylamino)-5'-N-ethylcarboxamidoadenosine	CTD	2.329e-05	0.3906	0.0003929	0.004049	3	27	EPHX2,TNF,VEGFA
990	ctd:C483321	6-bromoindirubin-3'-oxime	CTD	2.329e-05	0.3906	0.0003929	0.004049	3	27	CASP8,TNF,IL6
991	ctd:C106335	macrophage stimulatory lipopeptide 2	CTD	2.329e-05	0.3906	0.0003929	0.004049	3	27	HIF1A,IL6,VEGFA
992	CID000071324	AC1Q5QTP	Stitch	2.329e-05	0.3906	0.0003929	0.004049	3	27	ACE,NOS3,CYBA
993	ctd:D020030	Nitric Oxide Donors	CTD	2.329e-05	0.3906	0.0003929	0.004049	3	27	HIF1A,CCL5,TNF
994	ctd:C482492	3,4,5,4'-tetramethoxystilbene	CTD	2.329e-05	0.3906	0.0003929	0.004049	3	27	KDR,TNF,VEGFA
995	ctd:C008435	methyldithiocarbamate	CTD	2.36e-05	0.3958	0.0003973	0.004094	4	81	HIF1A,CCL5,TNF,IL6
996	ctd:D018170	Sumatriptan	CTD	2.36e-05	0.3958	0.0003973	0.004094	4	81	TNF,IL6,BDNF,VEGFA
997	ctd:C482199	lipopolysaccharide, E coli O55-B5	CTD	2.398e-05	0.402	0.0004023	0.004145	13	1680	EPHX2,IGF1,HLA-A,HLA-DRB1,CASP8,C3,CCL5,TNF,NOS3,IL6,LGALS1,VEGFA,CYBA
998	CID000002399	BiM4	Stitch	2.448e-05	0.4105	0.0004023	0.004145	6	283	IGF1,CASP8,CCL5,TNF,NOS3,VEGFA
999	ctd:C042577	diallyl trisulfide	CTD	2.461e-05	0.4126	0.0004023	0.004145	5	168	GSTP1,CASP8,TNF,NOS3,VEGFA
1000	CID000000698	estrone-d4	Stitch	2.461e-05	0.4126	0.0004023	0.004145	5	168	IGF1,ACE,NOS3,PRL,LGALS1
1001	ctd:C025205	1,10-phenanthroline	CTD	2.478e-05	0.4154	0.0004023	0.004145	4	82	HIF1A,ACE,BDNF,VEGFA
1002	ctd:C072936	notoginsenoside R1	CTD	2.478e-05	0.4154	0.0004023	0.004145	4	82	CASP8,TNF,NOS3,IL6
1003	ctd:D052203	Ferrosoferric Oxide	CTD	2.496e-05	0.4185	0.0004023	0.004145	2	4	TNF,IL6
1004	CID000003725	AC1L1GKK	Stitch	2.496e-05	0.4185	0.0004023	0.004145	2	4	IGF1,IGF1R
1005	ctd:C100416	peginterferon alfa-2a	CTD	2.496e-05	0.4185	0.0004023	0.004145	2	4	TNF,IL6
1006	ctd:C570843	RSVA405	CTD	2.496e-05	0.4185	0.0004023	0.004145	2	4	TNF,IL6
1007	ctd:C570842	RSVA314	CTD	2.496e-05	0.4185	0.0004023	0.004145	2	4	TNF,IL6
1008	ctd:C507553	4'-O-methylalpinumisoflavone	CTD	2.496e-05	0.4185	0.0004023	0.004145	2	4	HIF1A,VEGFA
1009	ctd:C436747	cardamonin	CTD	2.496e-05	0.4185	0.0004023	0.004145	2	4	TNF,IL6
1010	ctd:C506362	yu ping feng san	CTD	2.496e-05	0.4185	0.0004023	0.004145	2	4	TNF,IL6
1011	ctd:D017265	Procaterol	CTD	2.496e-05	0.4185	0.0004023	0.004145	2	4	TNF,IL6
1012	CID000171423	Hgh (6-13)	Stitch	2.496e-05	0.4185	0.0004023	0.004145	2	4	IGF1,PRL
1013	CID000956683	T67416	Stitch	2.496e-05	0.4185	0.0004023	0.004145	2	4	FLT1,KDR
1014	CID000125377	Rb 6145	Stitch	2.496e-05	0.4185	0.0004023	0.004145	2	4	CASP8,EPAS1
1015	ctd:C511312	amyrone	CTD	2.496e-05	0.4185	0.0004023	0.004145	2	4	TNF,IL6
1016	ctd:C017226	7,8-dihydrobiopterin	CTD	2.496e-05	0.4185	0.0004023	0.004145	2	4	EPO,NOS3
1017	ctd:C031572	1-carboxyheptylimidazole	CTD	2.496e-05	0.4185	0.0004023	0.004145	2	4	CCL5,TNF
1018	ctd:C102874	chromium nicotinic acid complex	CTD	2.496e-05	0.4185	0.0004023	0.004145	2	4	TNF,IL6
1019	ctd:D001060	Aporphines	CTD	2.496e-05	0.4185	0.0004023	0.004145	2	4	TNF,IL6
1020	ctd:D002241	Carbohydrates	CTD	2.496e-05	0.4185	0.0004023	0.004145	2	4	TNF,IL6
1021	DB01915	S-Hydroxycysteine	Drug Bank	2.496e-05	0.4185	0.0004023	0.004145	2	4	GSTP1,C3
1022	ctd:C033022	hesperidin methylchalcone	CTD	2.496e-05	0.4185	0.0004023	0.004145	2	4	TNF,IL6
1023	ctd:C492470	fluor-edenite	CTD	2.496e-05	0.4185	0.0004023	0.004145	2	4	IL6,VEGFA
1024	CID000163001	malabaricone B	Stitch	2.496e-05	0.4185	0.0004023	0.004145	2	4	ARG2,NOS3
1025	ctd:D013765	Tetrahydropapaveroline	CTD	2.496e-05	0.4185	0.0004023	0.004145	2	4	TNF,IL6
1026	ctd:D011140	Polyurethanes	CTD	2.496e-05	0.4185	0.0004023	0.004145	2	4	TNF,IL6
1027	ctd:C046832	t-butyloxycarbonyl-methionyl-leucyl-phenylalanine	CTD	2.496e-05	0.4185	0.0004023	0.004145	2	4	TNF,IL6
1028	ctd:D013627	Talc	CTD	2.496e-05	0.4185	0.0004023	0.004145	2	4	TNF,IL6
1029	CID000333795	NSC-337788	Stitch	2.496e-05	0.4185	0.0004023	0.004145	2	4	TNF,IL6
1030	ctd:D002867	Chromones	CTD	2.496e-05	0.4185	0.0004023	0.004145	2	4	TNF,IL6
1031	ctd:D057889	Iridoid Glycosides	CTD	2.496e-05	0.4185	0.0004023	0.004145	2	4	TNF,IL6
1032	ctd:C085192	molybdenum chloride	CTD	2.496e-05	0.4185	0.0004023	0.004145	2	4	TNF,IL6
1033	ctd:C532887	diarctigenin	CTD	2.496e-05	0.4185	0.0004023	0.004145	2	4	TNF,IL6
1034	ctd:C060188	Gur	CTD	2.496e-05	0.4185	0.0004023	0.004145	2	4	TNF,IL6
1035	ctd:C036455	praeruptorin E	CTD	2.496e-05	0.4185	0.0004023	0.004145	2	4	TNF,IL6
1036	ctd:C468268	JTE 607	CTD	2.496e-05	0.4185	0.0004023	0.004145	2	4	TNF,IL6
1037	ctd:C034008	11-deoxyprostaglandin E1	CTD	2.496e-05	0.4185	0.0004023	0.004145	2	4	TNF,NOS3
1038	ctd:C011321	oxibendazole	CTD	2.496e-05	0.4185	0.0004023	0.004145	2	4	GSTP1,TNF
1039	CID000011562	3-bromoaniline	Stitch	2.496e-05	0.4185	0.0004023	0.004145	2	4	FLT1,KDR
1040	CID000000250	pheophytin	Stitch	2.497e-05	0.4187	0.0004023	0.004145	6	284	GSTP1,HLA-A,TNF,F5,NOS3,IL6
1041	ctd:C017160	cypermethrin	CTD	2.497e-05	0.4187	0.0004023	0.004145	6	284	GSTP1,IGF1,IGF1R,TNF,IL6,BDNF
1042	ctd:D010862	Pilocarpine	CTD	2.547e-05	0.4271	0.0004099	0.004224	6	285	EPO,HIF1A,TNF,IL6,BDNF,VEGFA
1043	ctd:D017673	Sodium Chloride, Dietary	CTD	2.599e-05	0.4358	0.0004136	0.004262	4	83	HIF1A,IGF1,ACE,IL6
1044	CID011840917	DB07356	Stitch	2.599e-05	0.4358	0.0004136	0.004262	4	83	HLA-A,CCL5,TNF,IL6
1045	CID000003157	doxazosin	Stitch	2.599e-05	0.4358	0.0004136	0.004262	4	83	TNF,F2,ACE,VEGFA
1046	CID000072513	AC1L2I7Q	Stitch	2.599e-05	0.4358	0.0004136	0.004262	4	83	FZD4,EPO,LRP5,NDP
1047	CID000023963	titanium	Stitch	2.605e-05	0.4367	0.0004136	0.004262	5	170	ARG2,TSPAN12,C3,TNF,IL6
1048	CID000008078	cyclohexane	Stitch	2.605e-05	0.4367	0.0004136	0.004262	5	170	CASP8,TNF,F2,IL6,PRL
1049	ctd:C078814	anandamide	CTD	2.605e-05	0.4368	0.0004136	0.004262	3	28	IGF1,TNF,VEGFA
1050	ctd:C014036	4-hydroxyestradiol	CTD	2.605e-05	0.4368	0.0004136	0.004262	3	28	HIF1A,IGF1R,VEGFA
1051	ctd:C062018	HU 211	CTD	2.605e-05	0.4368	0.0004136	0.004262	3	28	TNF,IL6,BDNF
1052	ctd:C015854	estradiol valerate	CTD	2.605e-05	0.4368	0.0004136	0.004262	3	28	GSTP1,IGF1,PRL
1053	ctd:C437965	olmesartan	CTD	2.605e-05	0.4368	0.0004136	0.004262	3	28	NOS3,IL6,CYBA
1054	CID000004315	1900-01-01 13:00:00	Stitch	2.605e-05	0.4368	0.0004136	0.004262	3	28	IGF1,CCL5,ACE
1055	ctd:C032171	4-coumaric acid	CTD	2.605e-05	0.4368	0.0004136	0.004262	3	28	TNF,NOS3,IL6
1056	CID009543513	Dg-B	Stitch	2.605e-05	0.4368	0.0004136	0.004262	3	28	NAMPT,CASP8,IL6
1057	CID000004900	AC1L1J7E	Stitch	2.679e-05	0.4492	0.0004245	0.004375	5	171	GSTP1,EPO,IGF1,HLA-B,ACE
1058	ctd:C012606	4-vinyl-1-cyclohexene dioxide	CTD	2.679e-05	0.4492	0.0004245	0.004375	5	171	GSTP1,HIF1A,IGF1R,IL6,VEGFA
1059	CID000159822	AC1L4MJU	Stitch	2.701e-05	0.4529	0.0004277	0.004407	6	288	EPO,ANGPT1,ANGPT2,CASP8,TNF,VEGFA
1060	CID000002533	calphostin C	Stitch	2.715e-05	0.4552	0.0004294	0.004425	7	431	IGF1,TNF,F2,ACE,NOS3,IL6,VEGFA
1061	CID005287668	AC1NRA2O	Stitch	2.725e-05	0.4569	0.0004302	0.004433	4	84	GSTP1,NAMPT,TNF,IL6
1062	ctd:D011137	Polystyrenes	CTD	2.725e-05	0.4569	0.0004302	0.004433	4	84	TSPAN12,APLN,TNF,IL6
1063	ctd:C063509	N-(2-(4-bromocinnamylamino)ethyl)-5-isoquinolinesulfonamide	CTD	2.755e-05	0.4619	0.0004345	0.004478	5	172	TNF,NOS3,IL6,BDNF,VEGFA
1064	CID000003591	AC1L1G9T	Stitch	2.796e-05	0.4688	0.0004406	0.004541	7	433	CCL5,TNF,F2,NOS3,IL6,PRL,EPAS1
1065	CID000001690	4-epidoxorubicin	Stitch	2.849e-05	0.4777	0.0004485	0.004622	9	788	GSTP1,FLT1,HIF1A,CASP8,TNF,ATF4,NOS3,IL6,PRL
1066	CID000000146	5-methyltetrahydrofolate	Stitch	2.855e-05	0.4787	0.0004491	0.004628	4	85	HLA-B,MTHFR,F5,NOS3
1067	ctd:D004026	Dieldrin	CTD	2.86e-05	0.4796	0.0004495	0.004631	11	1217	EPHX2,IGF1,NAMPT,NAA15,CASP8,KDR,TNF,F2,IL6,PRL,VEGFA
1068	ctd:D005273	Fenbendazole	CTD	2.901e-05	0.4865	0.0004534	0.004672	3	29	GSTP1,TNF,VEGFA
1069	CID000000038	ketopantoate	Stitch	2.901e-05	0.4865	0.0004534	0.004672	3	29	FLT1,HIF1A,IL6
1070	CID000091458	aucubin	Stitch	2.901e-05	0.4865	0.0004534	0.004672	3	29	GSTP1,TNF,IL6
1071	ctd:D014508	Urea	CTD	2.901e-05	0.4865	0.0004534	0.004672	3	29	ARG2,EPHX2,KDR
1072	ctd:C041359	terbinafine	CTD	2.901e-05	0.4865	0.0004534	0.004672	3	29	GSTP1,CCL5,TNF
1073	ctd:C096064	actein	CTD	2.901e-05	0.4865	0.0004534	0.004672	3	29	EPO,FLT1,C5
1074	CID000000076	ITdU	Stitch	2.918e-05	0.4893	0.0004556	0.004695	6	292	HIF1A,IGF1,TNF,NOS3,IL6,PRL
1075	ctd:D010894	Piroxicam	CTD	2.923e-05	0.49	0.0004559	0.004697	8	603	NAA15,HLA-A,HLA-B,TNF,ATF4,IL6,EPAS1,VEGFA
1076	CID000001099	sulfite	Stitch	3.009e-05	0.5044	0.0004688	0.004831	7	438	GSTP1,IGF1,C3,TNF,NOS3,IL6,PRL
1077	CID000020518	11-deoxojervine	Stitch	3.076e-05	0.5157	0.0004788	0.004934	5	176	FZD4,ANGPT1,ANGPT2,IHH,VEGFA
1078	CID000000936	vitamin B	Stitch	3.09e-05	0.5181	0.0004806	0.004953	6	295	NAMPT,TNF,NOS3,IL6,VEGFA,CYBA
1079	ctd:C031278	2-chloroethyl ethyl sulfide	CTD	3.129e-05	0.5247	0.0004849	0.004997	4	87	GSTP1,CASP8,TNF,IL6
1080	ctd:C006680	baicalein	CTD	3.129e-05	0.5247	0.0004849	0.004997	4	87	IGF1,CASP8,TNF,VEGFA
1081	CID000068876	cloricromene	Stitch	3.129e-05	0.5247	0.0004849	0.004997	4	87	GSTP1,MTHFR,TNF,F2
1082	ctd:C084656	paricalcitol	CTD	3.129e-05	0.5247	0.0004849	0.004997	4	87	TNF,NOS3,IL6,CYBA
1083	CID000001207	MK-801	Stitch	3.149e-05	0.528	0.0004876	0.005024	6	296	MTHFR,C3,TNF,NOS3,PRL,BDNF
1084	ctd:D000638	Amiodarone	CTD	3.157e-05	0.5293	0.0004883	0.005031	12	1470	GSTP1,IGF1,LRP5,CASP8,KDR,TNF,ATF4,F2,NOS3,IL6,PRL,VEGFA
1085	ctd:D001663	Bilirubin	CTD	3.16e-05	0.5299	0.0004884	0.005032	5	177	GSTP1,FLT1,HIF1A,TNF,IL6
1086	CID000196144	Gf 109	Stitch	3.219e-05	0.5397	0.0004961	0.005112	3	30	CCL5,F2,PRL
1087	CID005326870	1wbv	Stitch	3.219e-05	0.5397	0.0004961	0.005112	3	30	HLA-A,HLA-B,BDNF
1088	ctd:C035419	3,4-dihydroxybenzohydroxamic acid	CTD	3.219e-05	0.5397	0.0004961	0.005112	3	30	C3,TNF,IL6
1089	ctd:D002084	Butylated Hydroxytoluene	CTD	3.247e-05	0.5443	0.0004999	0.005151	5	178	GSTP1,CCL5,TNF,C5,VEGFA
1090	CID000005219	3-morpholinosydnonimine (SIN-1	Stitch	3.273e-05	0.5489	0.0005035	0.005189	4	88	HIF1A,F2,NOS3,IL6
1091	CID000005711	Y-27632	Stitch	3.281e-05	0.5501	0.000504	0.005193	7	444	SEMA3A,TNF,F2,NOS3,IL6,VEGFA,CYBA
1092	CID000200878	P-38	Stitch	3.285e-05	0.5508	0.000504	0.005193	8	613	FLT1,HIF1A,IGF1R,ANGPT1,CASP8,CCL5,NOS3,IL6
1093	CID000107707	Zlllal	Stitch	3.285e-05	0.5508	0.000504	0.005193	8	613	GSTP1,HIF1A,CASP8,CCL5,TNF,NOS3,IL6,VEGFA
1094	ctd:D006540	Herbicides	CTD	3.335e-05	0.5591	0.0005111	0.005266	5	179	GSTP1,TNF,F2,PRL,BDNF
1095	CID000026229	p-chlorophenoxyacetic acid	Stitch	3.559e-05	0.5967	0.0005425	0.00559	3	31	EPHX2,C5,ACE
1096	ctd:C055421	tin mesoporphyrin	CTD	3.559e-05	0.5967	0.0005425	0.00559	3	31	EPO,TNF,NOS3
1097	ctd:D004966	Estrogens, Conjugated (USP)	CTD	3.559e-05	0.5967	0.0005425	0.00559	3	31	IGF1,ACE,NOS3
1098	ctd:D000806	Angiotensin-Converting Enzyme Inhibitors	CTD	3.559e-05	0.5967	0.0005425	0.00559	3	31	EPO,HLA-DRB1,ACE
1099	ctd:D009573	Nitrites	CTD	3.559e-05	0.5967	0.0005425	0.00559	3	31	EPO,TNF,NOS3
1100	ctd:C495818	2-morpholin-4-yl-6-thianthren-1-yl-pyran-4-one	CTD	3.559e-05	0.5967	0.0005425	0.00559	3	31	IGF1,CASP8,TNF
1101	ctd:D006427	Hemin	CTD	3.576e-05	0.5996	0.0005436	0.005602	4	90	GSTP1,HIF1A,TNF,NOS3
1102	CID000153054	3'-dCTP	Stitch	3.576e-05	0.5996	0.0005436	0.005602	4	90	HIF1A,ATF4,EPAS1,VEGFA
1103	ctd:D011094	Polyethyleneimine	CTD	3.576e-05	0.5996	0.0005436	0.005602	4	90	C3,TNF,ATF4,IL6
1104	3699_UP	Alexidine dihydrochloride [22573-93-9]; Up 200; 6.8uM; PC3; HT_HG-U133A	Broad Institute CMAP Up	3.61e-05	0.6054	0.0005483	0.00565	5	182	MTHFR,ATF4,IL6,EPAS1,CYBA
1105	ctd:D017632	Asbestos, Serpentine	CTD	3.624e-05	0.6076	0.0005498	0.005666	7	451	FLT1,C3,CCL5,TNF,NDP,C5,IL6
1106	ctd:C029892	cupric chloride	CTD	3.727e-05	0.6249	0.000565	0.005822	8	624	HIF1A,IGF1,CASP8,TNF,ATF4,F2,IL6,VEGFA
1107	ctd:C067713	lactacystin	CTD	3.735e-05	0.6262	0.0005657	0.005829	4	91	HIF1A,CASP8,TNF,IL6
1108	CID000104842	SN-38	Stitch	3.804e-05	0.6378	0.0005751	0.005926	5	184	GSTP1,HIF1A,CASP8,IL6,VEGFA
1109	CID000445801	1ga8	Stitch	3.804e-05	0.6378	0.0005751	0.005926	5	184	IGF1,MTHFR,ACE,IL6,EPAS1
1110	CID000221534	NSC-6354	Stitch	3.899e-05	0.6537	0.000587	0.006049	4	92	TNF,NOS3,IL6,CYBA
1111	CID000009283	triphenyltetrazolium chloride	Stitch	3.899e-05	0.6537	0.000587	0.006049	4	92	EPO,HIF1A,NOS3,IL6
1112	ctd:D003913	Dextroamphetamine	CTD	3.903e-05	0.6545	0.000587	0.006049	5	185	NAMPT,ATF4,IL6,PRL,BDNF
1113	CID000000945	nitroxyl	Stitch	3.903e-05	0.6545	0.000587	0.006049	5	185	HLA-A,CASP8,CCL5,TNF,NOS3
1114	CID000001011	AC1L1AJ8	Stitch	3.921e-05	0.6575	0.000587	0.006049	3	32	IGF1,NAMPT,PRL
1115	ctd:C076946	donepezil	CTD	3.921e-05	0.6575	0.000587	0.006049	3	32	CASP8,TNF,IL6
1116	ctd:C103280	goniothalamin	CTD	3.921e-05	0.6575	0.000587	0.006049	3	32	CASP8,TNF,NOS3
1117	ctd:C501277	Mangifera indica extract	CTD	3.921e-05	0.6575	0.000587	0.006049	3	32	TNF,IL6,VEGFA
1118	CID000129869	atiprimod	Stitch	3.921e-05	0.6575	0.000587	0.006049	3	32	IGF1,IL6,VEGFA
1119	ctd:C026777	ICI 118551	CTD	3.921e-05	0.6575	0.000587	0.006049	3	32	TNF,IL6,VEGFA
1120	ctd:C517629	benzyloxycarbonyl-valyl-alanyl-aspartic acid	CTD	3.921e-05	0.6575	0.000587	0.006049	3	32	SCG3,CASP8,TNF
1121	CID000004991	pyridostigmine	Stitch	4.068e-05	0.6821	0.0006031	0.006215	4	93	IGF1,KDR,CCL5,PRL
1122	CID000011005	myristate	Stitch	4.076e-05	0.6834	0.0006031	0.006215	6	310	HLA-A,HLA-B,C3,TNF,F2,NOS3
1123	7368_UP	Metaraminol bitartrate [33402-03-8]; Up 200; 8.6uM; PC3; HT_HG-U133A	Broad Institute CMAP Up	4.109e-05	0.6889	0.0006031	0.006215	5	187	MTHFR,NDP,C5,IL6,EPAS1
1124	ctd:C045463	leflunomide	CTD	4.154e-05	0.6965	0.0006031	0.006215	9	827	GSTP1,IGF1,HLA-A,TNF,ATF4,C5,F5,IL6,VEGFA
1125	ctd:C076178	chebulagic acid	CTD	4.155e-05	0.6966	0.0006031	0.006215	2	5	TNF,VEGFA
1126	ctd:C412383	R 121919	CTD	4.155e-05	0.6966	0.0006031	0.006215	2	5	TNF,IL6
1127	CID009549305	PQ401	Stitch	4.155e-05	0.6966	0.0006031	0.006215	2	5	IGF1,IGF1R
1128	ctd:D065146	Zeaxanthins	CTD	4.155e-05	0.6966	0.0006031	0.006215	2	5	GSTP1,HIF1A
1129	ctd:C014477	diflorasone	CTD	4.155e-05	0.6966	0.0006031	0.006215	2	5	CCL5,IL6
1130	ctd:D005275	Fendiline	CTD	4.155e-05	0.6966	0.0006031	0.006215	2	5	F2,NOS3
1131	ctd:C520290	3,4-dihydroxybenzoate	CTD	4.155e-05	0.6966	0.0006031	0.006215	2	5	HIF1A,EPAS1
1132	ctd:C575894	3,4-dimethoxy-N-((2,2-dimethyl-2H-chromen-6-yl)methyl)-N-phenylbenzenesulfonamide	CTD	4.155e-05	0.6966	0.0006031	0.006215	2	5	HIF1A,VEGFA
1133	ctd:C500218	gamisopoonghwanghyul-tang	CTD	4.155e-05	0.6966	0.0006031	0.006215	2	5	TNF,IL6
1134	CID000042140	F 121	Stitch	4.155e-05	0.6966	0.0006031	0.006215	2	5	TNF,IL6
1135	ctd:C439205	Huangqin-Tang	CTD	4.155e-05	0.6966	0.0006031	0.006215	2	5	TNF,IL6
1136	ctd:C020905	glycyl-histidyl-lysine	CTD	4.155e-05	0.6966	0.0006031	0.006215	2	5	TNF,IL6
1137	ctd:C054528	allyl methyl disulfide	CTD	4.155e-05	0.6966	0.0006031	0.006215	2	5	TNF,IL6
1138	ctd:C031800	acetic anhydride	CTD	4.155e-05	0.6966	0.0006031	0.006215	2	5	TNF,IL6
1139	ctd:D009287	Naphthyridines	CTD	4.155e-05	0.6966	0.0006031	0.006215	2	5	KDR,TNF
1140	CID000083890	PMSD	Stitch	4.155e-05	0.6966	0.0006031	0.006215	2	5	HLA-A,HLA-B
1141	ctd:C525025	4-(4-(4-chloro-phenyl)thiazol-2-ylamino)phenol	CTD	4.155e-05	0.6966	0.0006031	0.006215	2	5	TNF,VEGFA
1142	ctd:C058544	R 59949	CTD	4.155e-05	0.6966	0.0006031	0.006215	2	5	HIF1A,VEGFA
1143	ctd:C008290	lipophosphonoglycan	CTD	4.155e-05	0.6966	0.0006031	0.006215	2	5	TNF,IL6
1144	ctd:C528740	3-(4-bromophenyl)-2-(ethylsulfonyl)-6-methylquinoxaline-1,4-dioxide	CTD	4.155e-05	0.6966	0.0006031	0.006215	2	5	HIF1A,VEGFA
1145	ctd:C021730	pinitol	CTD	4.155e-05	0.6966	0.0006031	0.006215	2	5	TNF,IL6
1146	ctd:D000373	Agglutinins	CTD	4.155e-05	0.6966	0.0006031	0.006215	2	5	TNF,IL6
1147	CID000070666	dansylglycine	Stitch	4.155e-05	0.6966	0.0006031	0.006215	2	5	HLA-A,ACE
1148	ctd:D011063	Poly A-U	CTD	4.155e-05	0.6966	0.0006031	0.006215	2	5	TNF,IL6
1149	CID000119335	AR 12463	Stitch	4.155e-05	0.6966	0.0006031	0.006215	2	5	F2,IL6
1150	ctd:C011188	cavidine	CTD	4.155e-05	0.6966	0.0006031	0.006215	2	5	TNF,IL6
1151	ctd:C111827	brinzolamide	CTD	4.155e-05	0.6966	0.0006031	0.006215	2	5	HLA-A,HLA-B
1152	ctd:C048507	vasoactive intestinal peptide, 4-chloro-Phe(6)-Leu(17)-	CTD	4.155e-05	0.6966	0.0006031	0.006215	2	5	PRL,VEGFA
1153	ctd:C047352	septilin	CTD	4.155e-05	0.6966	0.0006031	0.006215	2	5	TNF,IL6
1154	ctd:C049935	avobenzone	CTD	4.155e-05	0.6966	0.0006031	0.006215	2	5	GSTP1,VEGFA
1155	CID005497184	AC1NUZN0	Stitch	4.155e-05	0.6966	0.0006031	0.006215	2	5	CASP8,TNF
1156	ctd:C049325	1,2-dithiol-3-thione	CTD	4.193e-05	0.7031	0.0006082	0.006267	9	828	GSTP1,HIF1A,IGF1,NAA15,CCL5,ATF4,BDNF,VEGFA,CYBA
1157	2208_UP	Trichostatin A, from Streptomyces sp.; Up 200; 0.1uM; HL60; HT_HG-U133A	Broad Institute CMAP Up	4.215e-05	0.7067	0.0006108	0.006294	5	188	ARG2,FZD4,MTHFR,F5,EPAS1
1158	ctd:D019324	beta-Naphthoflavone	CTD	4.233e-05	0.7097	0.0006129	0.006315	9	829	GSTP1,IGF1,APLN,TNF,IHH,ACE,IL6,PRL,LGALS1
1159	CID000148193	NSC702818	Stitch	4.242e-05	0.7113	0.0006132	0.006319	4	94	EPO,FLT1,KDR,VEGFA
1160	CID000170607	NMMA	Stitch	4.242e-05	0.7113	0.0006132	0.006319	4	94	TNF,C5,NOS3,IL6
1161	CID000001178	AC1L1AWH	Stitch	4.307e-05	0.7222	0.0006188	0.006377	3	33	TNF,IL6,PRL
1162	ctd:C054634	methyllycaconitine	CTD	4.307e-05	0.7222	0.0006188	0.006377	3	33	TNF,IL6,BDNF
1163	CID000466151	prinomastat	Stitch	4.307e-05	0.7222	0.0006188	0.006377	3	33	FLT1,KDR,VEGFA
1164	ctd:C069741	norcantharidin	CTD	4.307e-05	0.7222	0.0006188	0.006377	3	33	ANGPT2,CASP8,VEGFA
1165	ctd:D008691	Methadone	CTD	4.307e-05	0.7222	0.0006188	0.006377	3	33	TNF,IL6,PRL
1166	ctd:D044243	Linoleic Acids, Conjugated	CTD	4.307e-05	0.7222	0.0006188	0.006377	3	33	CASP8,TNF,IL6
1167	ctd:C010272	palytoxin	CTD	4.307e-05	0.7222	0.0006188	0.006377	3	33	ANGPT2,NOS3,VEGFA
1168	CID000001413	12(S)-hydroxyeicosatetraenoic acid	Stitch	4.322e-05	0.7247	0.00062	0.006388	5	189	SEMA3A,TNF,F2,PRL,VEGFA
1169	CID000000006	DNCB	Stitch	4.322e-05	0.7247	0.00062	0.006388	5	189	ARG2,EPHX2,GSTP1,TNF,IL6
1170	ctd:C011559	tributyltin	CTD	4.398e-05	0.7375	0.0006303	0.006495	7	465	IGF1,NAMPT,CASP8,TNF,NOS3,IL6,PRL
1171	CID000002889	Oils, Galangal	Stitch	4.432e-05	0.7432	0.0006347	0.00654	5	190	GSTP1,IGF1R,CASP8,TNF,IL6
1172	ctd:C036042	dicyclohexyl phthalate	CTD	4.519e-05	0.7576	0.0006464	0.006661	9	836	GSTP1,FLT1,IGF1,ANGPT2,MTHFR,C3,SUCNR1,NOS3,BDNF
1173	CID000004943	propofol	Stitch	4.545e-05	0.762	0.0006485	0.006683	5	191	HIF1A,TNF,ACE,NOS3,IL6
1174	CID000001701	AEBSF	Stitch	4.545e-05	0.762	0.0006485	0.006683	5	191	HIF1A,CASP8,TNF,BDNF,CYBA
1175	ctd:D009534	Niclosamide	CTD	4.545e-05	0.762	0.0006485	0.006683	5	191	IGF1R,CCL5,TNF,ATF4,IL6
1176	ctd:C026486	1,2,5,6-dibenzanthracene	CTD	4.603e-05	0.7718	0.0006547	0.006746	9	838	GSTP1,HIF1A,IGF1,NAMPT,IGF1R,MTHFR,C5,NOS3,LGALS1
1177	CID000065124	nitrotyrosine	Stitch	4.607e-05	0.7725	0.0006547	0.006746	4	96	HIF1A,HLA-A,NOS3,CYBA
1178	CID000002046	AG126	Stitch	4.607e-05	0.7725	0.0006547	0.006746	4	96	TNF,NOS3,IL6,VEGFA
1179	CID000003136	DMNQ	Stitch	4.607e-05	0.7725	0.0006547	0.006746	4	96	HIF1A,CASP8,F5,LGALS1
1180	CID010447660	IL-1R antagonist	Stitch	4.607e-05	0.7725	0.0006547	0.006746	4	96	IGF1,C3,CCL5,IL6
1181	ctd:D015034	Zinc Oxide	CTD	4.615e-05	0.7738	0.0006552	0.006752	6	317	FLT1,IGF1,IGF1R,CASP8,TNF,IL6
1182	CID000002550	H526	Stitch	4.659e-05	0.7812	0.0006609	0.00681	5	192	IGF1,KDR,TNF,ACE,PRL
1183	CID000002459	bucillamine	Stitch	4.717e-05	0.7909	0.0006647	0.006849	3	34	TNF,IL6,VEGFA
1184	ctd:C507035	ethyl 6-(N-(2-chloro-4-fluorophenyl)sulfamoyl)cyclohex-1-ene-1-carboxylate	CTD	4.717e-05	0.7909	0.0006647	0.006849	3	34	CCL5,TNF,IL6
1185	ctd:C000593591	coagulin-L	CTD	4.717e-05	0.7909	0.0006647	0.006849	3	34	CCL5,TNF,IL6
1186	ctd:C549066	4-methyl-N1-(3-phenylpropyl)benzene-1,2-diamine	CTD	4.717e-05	0.7909	0.0006647	0.006849	3	34	CASP8,TNF,IL6
1187	CID011967789	pH x	Stitch	4.717e-05	0.7909	0.0006647	0.006849	3	34	KDR,TNF,IL6
1188	CID000321710	oxindole	Stitch	4.717e-05	0.7909	0.0006647	0.006849	3	34	FLT1,KDR,VEGFA
1189	CID000009214	biphenylene	Stitch	4.717e-05	0.7909	0.0006647	0.006849	3	34	IGF1R,ANGPT1,CYBA
1190	CID000000862	AC1L1A6Z	Stitch	4.717e-05	0.7909	0.0006647	0.006849	3	34	C3,TNF,IL6
1191	CID000001693	4-hydroxynonenal	Stitch	4.77e-05	0.7997	0.0006706	0.00691	7	471	GSTP1,CASP8,TNF,NOS3,IL6,VEGFA,CYBA
1192	CID009549284	MEK1/2 inhibitor	Stitch	4.776e-05	0.8007	0.0006706	0.00691	5	193	NAMPT,CASP8,IHH,IL6,BDNF
1193	CID000000640	NSC23615	Stitch	4.776e-05	0.8007	0.0006706	0.00691	5	193	IGF1,CASP8,F5,PRL,BDNF
1194	CID006857413	AC1OAGKW	Stitch	4.776e-05	0.8007	0.0006706	0.00691	5	193	IGF1,IGF1R,F2,NOS3,VEGFA
1195	CID000000408	S)-cotinine	Stitch	4.798e-05	0.8045	0.0006732	0.006937	4	97	GSTP1,CASP8,PRL,VEGFA
1196	4192_DN	Roxithromycin [80214-83-1]; Down 200; 4.8uM; PC3; HT_HG-U133A	Broad Institute CMAP Down	4.894e-05	0.8206	0.0006856	0.007065	5	194	VASH1,CASP8,C5,F5,VEGFA
1197	ctd:D007608	Kainic Acid	CTD	4.894e-05	0.8206	0.0006856	0.007065	5	194	EPO,TNF,IL6,BDNF,VEGFA
1198	CID000005410	NSC98537	Stitch	4.899e-05	0.8214	0.0006856	0.007065	7	473	IGF1,IGF1R,SCG3,IHH,IL6,PRL,VEGFA
1199	ctd:C056933	fumonisin B1	CTD	4.948e-05	0.8296	0.0006919	0.00713	6	321	IGF1,KDR,CCL5,TNF,IL6,VEGFA
1200	ctd:D013656	Taurocholic Acid	CTD	4.995e-05	0.8375	0.0006979	0.007192	4	98	CASP8,CCL5,TNF,IL6
1201	ctd:C006703	benzo(b)fluoranthene	CTD	5.013e-05	0.8405	0.0006985	0.007197	12	1541	FZD4,HIF1A,IGF1,APLN,MTHFR,VASH1,C3,CCL5,C5,IHH,SUCNR1,NOS3
1202	ctd:D006710	Homocysteine	CTD	5.015e-05	0.8409	0.0006985	0.007197	5	195	MTHFR,CCL5,TNF,NOS3,VEGFA
1203	CID011957432	Gi-2	Stitch	5.015e-05	0.8409	0.0006985	0.007197	5	195	IGF1,APLN,ATF4,F2,PRL
1204	4318_UP	Flecainide acetate [54143-56-5]; Up 200; 8.4uM; PC3; HT_HG-U133A	Broad Institute CMAP Up	5.015e-05	0.8409	0.0006985	0.007197	5	195	FLT1,ANGPT1,MTHFR,CASP8,EPAS1
1205	1906_DN	Hydrochlorothiazide [58-93-5]; Down 200; 13.4uM; PC3; HG-U133A	Broad Institute CMAP Down	5.139e-05	0.8616	0.0007133	0.00735	5	196	ARG2,SEMA3A,TEAD4,EPAS1,VEGFA
1206	ctd:D016593	Terfenadine	CTD	5.152e-05	0.8638	0.0007133	0.00735	3	35	CASP8,TNF,IL6
1207	ctd:C088115	anacardic acid	CTD	5.152e-05	0.8638	0.0007133	0.00735	3	35	CASP8,TNF,VEGFA
1208	ctd:C026305	cobalt sulfate	CTD	5.152e-05	0.8638	0.0007133	0.00735	3	35	HIF1A,IGF1,VEGFA
1209	ctd:D020913	Perindopril	CTD	5.152e-05	0.8638	0.0007133	0.00735	3	35	TNF,ACE,IL6
1210	ctd:C076944	salvianolic acid B	CTD	5.152e-05	0.8638	0.0007133	0.00735	3	35	TNF,IL6,BDNF
1211	ctd:D011241	Prednisone	CTD	5.152e-05	0.8638	0.0007133	0.00735	3	35	HIF1A,TNF,VEGFA
1212	ctd:D019787	Linoleic Acid	CTD	5.197e-05	0.8715	0.0007184	0.007403	4	99	TNF,NOS3,IL6,VEGFA
1213	CID000000011	1,2-dichloroethane	Stitch	5.197e-05	0.8715	0.0007184	0.007403	4	99	FLT1,KDR,F2,VEGFA
1214	ctd:D001507	Beclomethasone	CTD	5.21e-05	0.8736	0.0007196	0.007415	6	324	GSTP1,CCL5,TNF,F5,IL6,VEGFA
1215	CID000004829	pioglitazone	Stitch	5.391e-05	0.9039	0.0007436	0.007662	6	326	HIF1A,NAMPT,TNF,NOS3,IL6,VEGFA
1216	CID000000937	niacin	Stitch	5.393e-05	0.9042	0.0007436	0.007662	5	198	NAMPT,ANGPT1,HLA-B,MTHFR,TNF
1217	ctd:C066075	vanadium pentoxide	CTD	5.406e-05	0.9064	0.0007442	0.007668	4	100	NAMPT,TNF,IL6,VEGFA
1218	CID000083786	1 Tc1	Stitch	5.406e-05	0.9064	0.0007442	0.007668	4	100	ARG2,TNF,NOS3,CYBA
1219	CID005280343	quercetin	Stitch	5.517e-05	0.925	0.0007589	0.00782	7	482	GSTP1,HIF1A,TNF,F2,NOS3,IL6,PRL
1220	ctd:C057862	cyanoginosin LR	CTD	5.577e-05	0.935	0.0007658	0.007891	6	328	GSTP1,EPO,CASP8,TNF,IL6,LGALS1
1221	CID000000338	salicylate	Stitch	5.577e-05	0.935	0.0007658	0.007891	6	328	HIF1A,HLA-A,CASP8,TNF,NOS3,VEGFA
1222	ctd:C042720	mercuric bromide	CTD	5.588e-05	0.9369	0.0007667	0.0079	10	1076	GSTP1,FLT1,VASH1,CASP8,NDP,F5,IL6,EPAS1,BDNF,VEGFA
1223	ctd:D004144	Diosgenin	CTD	5.612e-05	0.941	0.0007688	0.007922	3	36	TNF,IL6,VEGFA
1224	ctd:C009900	lipoteichoic acid	CTD	5.612e-05	0.941	0.0007688	0.007922	3	36	CCL5,TNF,IL6
1225	CID000003653	AC1L1GEZ	Stitch	5.656e-05	0.9484	0.0007729	0.007964	5	200	FZD4,EPO,HIF1A,TNF,IL6
1226	4213_DN	Austricine [10180-88-8]; Down 200; 14.2uM; PC3; HT_HG-U133A	Broad Institute CMAP Down	5.656e-05	0.9484	0.0007729	0.007964	5	200	VASH1,CASP8,F5,IL6,EPAS1
1227	3019_UP	Furazolidone [67-45-8]; Up 200; 17.8uM; HL60; HT_HG-U133A	Broad Institute CMAP Up	5.656e-05	0.9484	0.0007729	0.007964	5	200	ARG2,SEMA3A,EPO,MTHFR,ACE
1228	ctd:D058185	Magnetite Nanoparticles	CTD	5.686e-05	0.9534	0.0007764	0.008	11	1312	ARG2,IGF1,IGF1R,ANGPT2,MALAT1,C3,CCL5,TNF,IHH,IL6,VEGFA
1229	ctd:C025256	nonylphenol	CTD	5.737e-05	0.9619	0.0007827	0.008065	7	485	GSTP1,APLN,C3,TNF,PRL,VEGFA,CYBA
1230	ctd:C031927	hydroquinone	CTD	5.791e-05	0.9711	0.0007895	0.008135	5	201	CASP8,CCL5,TNF,ATF4,IL6
1231	ctd:D002791	Cholesterol, Dietary	CTD	5.841e-05	0.9793	0.0007949	0.008191	4	102	IGF1,TNF,F2,NOS3
1232	CID006332158	AC1O3MDH	Stitch	5.841e-05	0.9793	0.0007949	0.008191	4	102	IGF1,TNF,NOS3,VEGFA
1233	CID005327302	Inhibitor 3	Stitch	6.068e-05	1	0.0008159	0.008408	4	103	CASP8,F2,F5,IL6
1234	ctd:C064294	sarpogrelate	CTD	6.099e-05	1	0.0008159	0.008408	3	37	KDR,NOS3,IL6
1235	ctd:D020889	Rolipram	CTD	6.099e-05	1	0.0008159	0.008408	3	37	TNF,IL6,BDNF
1236	CID005326617	[[(4aS,5aR,9aR)-2-amino-6,7-dimercapto-4-oxo-1,2,3,4a,5,5a,6,9a-octahydropyrano[3,2-g]pteridin-8-yl]methoxy-hydroxyphosphoryl] [(2R,3S,4R,5R)-5-(2-amino-6-oxo-7,8-dihydro-3H-purin-9-yl)-3,4-dihydroxy-2-oxolanyl]methyl hydrogen phosphate	Stitch	6.099e-05	1	0.0008159	0.008408	3	37	MTHFR,HLA-DRB1,NOS3
1237	ctd:D010693	Phloretin	CTD	6.099e-05	1	0.0008159	0.008408	3	37	CCL5,NOS3,IL6
1238	CID000520535	superoxide	Stitch	6.119e-05	1	0.0008159	0.008408	7	490	HIF1A,TNF,ACE,NOS3,IL6,VEGFA,CYBA
1239	ctd:C010902	decabromobiphenyl ether	CTD	6.121e-05	1	0.0008159	0.008408	12	1573	ARG2,EPHX2,EPO,IGF1,NAMPT,APLN,CCL5,TNF,TEAD4,BDNF,LGALS1,CYBA
1240	CID006453902	brazilein	Stitch	6.224e-05	1	0.0008159	0.008408	2	6	TNF,IL6
1241	ctd:C065446	spantide II	CTD	6.224e-05	1	0.0008159	0.008408	2	6	TNF,IL6
1242	ctd:C005963	cephaelin	CTD	6.224e-05	1	0.0008159	0.008408	2	6	CCL5,VEGFA
1243	CID005283144	8,9-DiHETrE	Stitch	6.224e-05	1	0.0008159	0.008408	2	6	EPHX2,NOS3
1244	ctd:C559853	1-(5-chloro-6-(trifluoromethoxy)-1H-benzoimidazol-2-yl)-1H-pyrazole-4-carboxylic acid	CTD	6.224e-05	1	0.0008159	0.008408	2	6	HIF1A,EPAS1
1245	ctd:D044946	Biflavonoids	CTD	6.224e-05	1	0.0008159	0.008408	2	6	TNF,IL6
1246	ctd:D004073	Digitoxigenin	CTD	6.224e-05	1	0.0008159	0.008408	2	6	CCL5,VEGFA
1247	ctd:C436447	sangre de grado	CTD	6.224e-05	1	0.0008159	0.008408	2	6	TNF,IL6
1248	ctd:D019786	Gadolinium DTPA	CTD	6.224e-05	1	0.0008159	0.008408	2	6	IL6,VEGFA
1249	ctd:C052954	N-bromotaurine	CTD	6.224e-05	1	0.0008159	0.008408	2	6	TNF,IL6
1250	ctd:C043410	N-chlorotaurine	CTD	6.224e-05	1	0.0008159	0.008408	2	6	TNF,IL6
1251	CID000198177	HiTec	Stitch	6.224e-05	1	0.0008159	0.008408	2	6	IGF1,IGF1R
1252	CID000042540	1,2,3,6,7,8-hexachlorodibenzo-p-dioxin	Stitch	6.224e-05	1	0.0008159	0.008408	2	6	C3,C5
1253	ctd:C056709	N,N-diacetylcystine	CTD	6.224e-05	1	0.0008159	0.008408	2	6	TNF,NOS3
1254	ctd:D013328	Strophanthins	CTD	6.224e-05	1	0.0008159	0.008408	2	6	CCL5,VEGFA
1255	ctd:D001388	Aziridines	CTD	6.224e-05	1	0.0008159	0.008408	2	6	TNF,IL6
1256	ctd:C018548	lanatoside C	CTD	6.224e-05	1	0.0008159	0.008408	2	6	CCL5,VEGFA
1257	ctd:C042103	zinc nitrate	CTD	6.224e-05	1	0.0008159	0.008408	2	6	TNF,IL6
1258	CID000002057	AC1L1CTI	Stitch	6.224e-05	1	0.0008159	0.008408	2	6	IGF1,IGF1R
1259	ctd:D002187	Cannabinol	CTD	6.224e-05	1	0.0008159	0.008408	2	6	TNF,IL6
1260	ctd:C500823	arvelexin	CTD	6.224e-05	1	0.0008159	0.008408	2	6	TNF,IL6
1261	ctd:C029753	aflatoxin B2	CTD	6.224e-05	1	0.0008159	0.008408	2	6	TNF,IL6
1262	ctd:C478099	gigantol	CTD	6.224e-05	1	0.0008159	0.008408	2	6	TNF,IL6
1263	CID000019072	AC1L2DER	Stitch	6.224e-05	1	0.0008159	0.008408	2	6	HLA-B,PRL
1264	ctd:C022616	thiazolyl blue	CTD	6.224e-05	1	0.0008159	0.008408	2	6	CASP8,BDNF
1265	CID005746247	amlodipine-benazepril	Stitch	6.224e-05	1	0.0008159	0.008408	2	6	TNF,ACE
1266	ctd:C575594	tributylhexadecylphosphonium bromide	CTD	6.224e-05	1	0.0008159	0.008408	2	6	TNF,IL6
1267	ctd:C007548	n-dodecane	CTD	6.224e-05	1	0.0008159	0.008408	2	6	TNF,IL6
1268	ctd:C503854	sodium boranocarbonate	CTD	6.224e-05	1	0.0008159	0.008408	2	6	TNF,IL6
1269	ctd:D008903	Minerals	CTD	6.224e-05	1	0.0008159	0.008408	2	6	TNF,IL6
1270	ctd:C472885	L-4F peptide	CTD	6.224e-05	1	0.0008159	0.008408	2	6	HIF1A,VEGFA
1271	ctd:C098657	5-amino-7-(2-phenylethyl)-2-(2-furyl)pyrazolo(4,3-e)-1,2,4-triazolo(1,5-c)pyrimidine	CTD	6.224e-05	1	0.0008159	0.008408	2	6	TNF,VEGFA
1272	ctd:C086648	eptifibatide	CTD	6.224e-05	1	0.0008159	0.008408	2	6	F2,IL6
1273	CID000203773	P-320	Stitch	6.224e-05	1	0.0008159	0.008408	2	6	FLT1,KDR
1274	ctd:C083030	dehydrocostus lactone	CTD	6.224e-05	1	0.0008159	0.008408	2	6	TNF,IL6
1275	ctd:C047382	kamebakaurin	CTD	6.224e-05	1	0.0008159	0.008408	2	6	CASP8,TNF
1276	ctd:C010024	4-aminophenylmercuriacetate	CTD	6.224e-05	1	0.0008159	0.008408	2	6	ACE,BDNF
1277	ctd:C479122	putranjivain A	CTD	6.224e-05	1	0.0008159	0.008408	2	6	TNF,IL6
1278	ctd:C578612	butane-2,3-dione thiosemicarbazone oxime	CTD	6.224e-05	1	0.0008159	0.008408	2	6	TNF,IL6
1279	ctd:C095210	tetralin	CTD	6.224e-05	1	0.0008159	0.008408	2	6	TNF,IL6
1280	ctd:C004912	ethylbenzene	CTD	6.301e-05	1	0.0008254	0.008505	4	104	GSTP1,NAMPT,CCL5,ACE
1281	CID000003405	folate polyglutamate	Stitch	6.358e-05	1	0.0008322	0.008576	5	205	EPO,HLA-B,MTHFR,F5,NOS3
1282	ctd:D014700	Verapamil	CTD	6.541e-05	1	0.0008528	0.008787	4	105	CASP8,TNF,IL6,PRL
1283	CID000657137	2-oyl	Stitch	6.541e-05	1	0.0008528	0.008787	4	105	CCL5,TNF,ACE,IL6
1284	CID003081257	Peptide 78	Stitch	6.541e-05	1	0.0008528	0.008787	4	105	CCL5,TNF,IL6,VEGFA
1285	CID000006264	DNFB	Stitch	6.541e-05	1	0.0008528	0.008787	4	105	TNF,ACE,IL6,PRL
1286	ctd:D019342	Acetic Acid	CTD	6.541e-05	1	0.0008528	0.008787	4	105	SEMA3A,NAMPT,TNF,IL6
1287	CID000000177	acetaldehyde	Stitch	6.584e-05	1	0.0008547	0.008808	6	338	NAA15,HLA-DRB1,CASP8,C3,TNF,IL6
1288	ctd:C002741	N-nitrosomorpholine	CTD	6.584e-05	1	0.0008547	0.008808	6	338	GSTP1,HIF1A,IGF1R,CASP8,VEGFA,CYBA
1289	CID000015542	N,N-diethylbenzamide	Stitch	6.612e-05	1	0.0008547	0.008808	3	38	FLT1,KDR,VEGFA
1290	ctd:D004004	Dichlororibofuranosylbenzimidazole	CTD	6.612e-05	1	0.0008547	0.008808	3	38	HIF1A,TNF,IL6
1291	ctd:C050229	demethoxycurcumin	CTD	6.612e-05	1	0.0008547	0.008808	3	38	KDR,TNF,VEGFA
1292	ctd:D002351	Carrageenan	CTD	6.612e-05	1	0.0008547	0.008808	3	38	CCL5,TNF,IL6
1293	CID000443451	Ga14	Stitch	6.612e-05	1	0.0008547	0.008808	3	38	HIF1A,NAA15,CASP8
1294	ctd:D013662	Tea	CTD	6.612e-05	1	0.0008547	0.008808	3	38	GSTP1,CASP8,TNF
1295	CID000020483	bis(2-hydroxyethyl) trisulfide	Stitch	6.612e-05	1	0.0008547	0.008808	3	38	ANGPT2,NOS3,VEGFA
1296	CID006918457	laulimalide	Stitch	6.612e-05	1	0.0008547	0.008808	3	38	C3,KDR,VEGFA
1297	CID000337783	AC1L7MFQ	Stitch	6.612e-05	1	0.0008547	0.008808	3	38	TNF,F2,F5
1298	CID000005360	suramin	Stitch	6.657e-05	1	0.00086	0.008861	5	207	IGF1,IGF1R,C3,NOS3,IL6
1299	ctd:C029790	2,2',3',4,4',5-hexachlorobiphenyl	CTD	6.751e-05	1	0.0008714	0.008979	13	1855	SEMA3A,FLT1,HIF1A,IGF1,MTHFR,LRP5,C3,KDR,CCL5,F2,F5,PRL,LGALS1
1300	ctd:C006418	adrenocorticotropin zinc	CTD	6.787e-05	1	0.0008747	0.009013	4	106	ARG2,C3,ACE,PRL
1301	ctd:D012967	Sodium Dodecyl Sulfate	CTD	6.787e-05	1	0.0008747	0.009013	4	106	CCL5,TNF,IL6,VEGFA
1302	CID011840913	DB07328	Stitch	6.811e-05	1	0.0008771	0.009038	5	208	GSTP1,IGF1,CASP8,IL6,BDNF
1303	ctd:C109476	epoxiconazole	CTD	6.913e-05	1	0.0008883	0.009153	6	341	EPHX2,GSTP1,IGF1,MTHFR,F5,BDNF
1304	CID000003962	Epi Lovastatin	Stitch	6.913e-05	1	0.0008883	0.009153	6	341	IGF1R,LRP5,TNF,IL6,PRL,VEGFA
1305	CID000003154	Cosopt	Stitch	6.913e-05	1	0.0008883	0.009153	6	341	FLT1,ANGPT2,NOS3,PRL,BDNF,VEGFA
1306	CID000000961	hydroxyl radicals	Stitch	6.929e-05	1	0.0008896	0.009167	11	1341	ARG2,EPHX2,GSTP1,HLA-A,C3,F2,ACE,F5,NOS3,LGALS1,CYBA
1307	CID000004650	benzoquinone	Stitch	6.967e-05	1	0.0008938	0.00921	5	209	HIF1A,CASP8,CCL5,IL6,BDNF
1308	ctd:D002331	Carnitine	CTD	7.152e-05	1	0.000912	0.009397	3	39	TNF,NOS3,IL6
1309	ctd:C030583	ceric oxide	CTD	7.152e-05	1	0.000912	0.009397	3	39	HLA-A,TNF,IL6
1310	CID000656970	MT-DADMe-ImmA	Stitch	7.152e-05	1	0.000912	0.009397	3	39	HLA-A,CCL5,VEGFA
1311	CID000079084	1-isocyanopropane	Stitch	7.152e-05	1	0.000912	0.009397	3	39	SEMA3A,F5,VEGFA
1312	CID005459358	DB04623	Stitch	7.152e-05	1	0.000912	0.009397	3	39	CCL5,TNF,IL6
1313	ctd:C097367	ginsenoside Rg3	CTD	7.152e-05	1	0.000912	0.009397	3	39	CASP8,TNF,BDNF
1314	ctd:D020156	Salicylic Acid	CTD	7.152e-05	1	0.000912	0.009397	3	39	TNF,NOS3,IL6
1315	CID009576740	Al per	Stitch	7.152e-05	1	0.000912	0.009397	3	39	HLA-A,HLA-B,C3
1316	ctd:C029938	nickel sulfate	CTD	7.217e-05	1	0.0009195	0.009475	12	1600	ARG2,FLT1,HIF1A,NAMPT,HLA-B,CCL5,TNF,C5,IL6,EPAS1,VEGFA,CYBA
1317	ctd:D002737	Chloroprene	CTD	7.262e-05	1	0.0009246	0.009527	11	1348	ARG2,FLT1,IGF1,NAMPT,NAA15,ANGPT1,APLN,CCL5,TNF,F5,BDNF
1318	ctd:D001194	Asbestos	CTD	7.288e-05	1	0.0009271	0.009553	5	211	GSTP1,CCL5,TNF,IL6,VEGFA
1319	ctd:C027561	butylbenzyl phthalate	CTD	7.299e-05	1	0.0009272	0.009554	4	108	IGF1,CASP8,TNF,VEGFA
1320	CID000025429	carbendazim	Stitch	7.299e-05	1	0.0009272	0.009554	4	108	NAA15,IHH,PRL,VEGFA
1321	ctd:D014241	Trichloroethylene	CTD	7.539e-05	1	0.0009569	0.00986	13	1875	EPHX2,SCG3,C3,KDR,CCL5,TNF,IHH,F2,NOS3,IL6,PRL,EPAS1,BDNF
1322	ctd:C038459	curdlan	CTD	7.566e-05	1	0.0009582	0.009873	4	109	CCL5,TNF,IL6,VEGFA
1323	ctd:D011433	Propranolol	CTD	7.566e-05	1	0.0009582	0.009873	4	109	TNF,NOS3,IL6,VEGFA
1324	CID000443071	C11105	Stitch	7.566e-05	1	0.0009582	0.009873	4	109	EPO,TNF,IL6,VEGFA
1325	ctd:D008701	Methapyrilene	CTD	7.611e-05	1	0.0009631	0.009924	6	347	HIF1A,CCL5,ATF4,MIR223,IL6,VEGFA
1326	ctd:C005975	3,4-dihydroxyphenylethanol	CTD	7.721e-05	1	0.0009712	0.01001	3	40	CCL5,TNF,IL6
1327	ctd:C007997	25-hydroxycholesterol	CTD	7.721e-05	1	0.0009712	0.01001	3	40	CASP8,NOS3,IL6
1328	CID000003077	dimaprit	Stitch	7.721e-05	1	0.0009712	0.01001	3	40	TNF,IL6,PRL
1329	ctd:D012439	Saccharin	CTD	7.721e-05	1	0.0009712	0.01001	3	40	KDR,TNF,VEGFA
1330	ctd:C025451	sodium bisulfide	CTD	7.721e-05	1	0.0009712	0.01001	3	40	TNF,NOS3,IL6
1331	ctd:C119129	18alpha-glycyrrhetinic acid	CTD	7.721e-05	1	0.0009712	0.01001	3	40	TNF,IL6,VEGFA
1332	ctd:D020358	Sodium Cholate	CTD	7.721e-05	1	0.0009712	0.01001	3	40	HIF1A,CCL5,TNF
1333	CID000071301	nebivolol	Stitch	7.721e-05	1	0.0009712	0.01001	3	40	ACE,NOS3,CYBA
1334	CID000656926	AC1LCVPZ	Stitch	7.84e-05	1	0.0009839	0.01014	4	110	HLA-A,C3,TNF,F2
1335	ctd:D009288	Naproxen	CTD	7.84e-05	1	0.0009839	0.01014	4	110	TNF,IL6,BDNF,VEGFA
1336	ctd:D007099	Imipramine	CTD	7.84e-05	1	0.0009839	0.01014	4	110	GSTP1,CASP8,TNF,BDNF
1337	CID000015325	DNTB	Stitch	8.139e-05	1	0.001021	0.01052	5	216	IGF1,HLA-A,HLA-B,HLA-DRB1,TNF
1338	CID000123726	mergetpa	Stitch	8.319e-05	1	0.001038	0.01069	3	41	ARG2,C3,ACE
1339	CID000133189	Phe-pro-arg	Stitch	8.319e-05	1	0.001038	0.01069	3	41	F2,F5,LGALS1
1340	ctd:C007628	esculetin	CTD	8.319e-05	1	0.001038	0.01069	3	41	CASP8,TNF,IL6
1341	ctd:C018381	salvin	CTD	8.319e-05	1	0.001038	0.01069	3	41	GSTP1,CASP8,TNF
1342	CID000030744	NPGB	Stitch	8.319e-05	1	0.001038	0.01069	3	41	C3,F2,F5
1343	ctd:C058819	calphostin C	CTD	8.319e-05	1	0.001038	0.01069	3	41	TNF,NOS3,IL6
1344	ctd:D019307	1-(5-Isoquinolinesulfonyl)-2-Methylpiperazine	CTD	8.319e-05	1	0.001038	0.01069	3	41	TNF,PRL,VEGFA
1345	ctd:D002110	Caffeine	CTD	8.357e-05	1	0.00104	0.01072	7	515	GSTP1,IGF1,IGF1R,TNF,IL6,BDNF,VEGFA
1346	ctd:C013038	hydroxyhydroquinone	CTD	8.409e-05	1	0.00104	0.01072	4	112	CASP8,CCL5,TNF,IL6
1347	CID000447364	3-nitro-4-hydroxyphenylacetic acid	Stitch	8.409e-05	1	0.00104	0.01072	4	112	NAA15,CCL5,PRL,VEGFA
1348	ctd:C015559	trimellitic anhydride	CTD	8.497e-05	1	0.00104	0.01072	13	1897	ARG2,FZD4,EPHX2,HIF1A,NAA15,SCG3,C3,TNF,F2,NOS3,IL6,LGALS1,VEGFA
1349	ctd:D007529	Isoflavones	CTD	8.501e-05	1	0.00104	0.01072	5	218	ARG2,IGF1,CASP8,C3,TNF
1350	ctd:C051890	irinotecan	CTD	8.606e-05	1	0.00104	0.01072	8	703	ARG2,IGF1,HLA-B,HLA-DRB1,MALAT1,CASP8,TNF,IL6
1351	CID000002524	1-alpha-25-dihydroxycholecalciferol	Stitch	8.612e-05	1	0.00104	0.01072	9	909	GSTP1,IGF1,ANGPT1,CCL5,TNF,IL6,PRL,BDNF,VEGFA
1352	CID000217025	Lt 3	Stitch	8.702e-05	1	0.00104	0.01072	2	7	MTHFR,TNF
1353	ctd:D017886	Durapatite	CTD	8.702e-05	1	0.00104	0.01072	2	7	TNF,IL6
1354	ctd:C054992	15-keto-5,8,11,13-eicosatetraenoic acid	CTD	8.702e-05	1	0.00104	0.01072	2	7	TNF,IL6
1355	ctd:C041648	pimobendan	CTD	8.702e-05	1	0.00104	0.01072	2	7	TNF,IL6
1356	ctd:C002166	4-methyl-7-diethylaminocoumarin	CTD	8.702e-05	1	0.00104	0.01072	2	7	HIF1A,VEGFA
1357	ctd:C533150	lancemaside A	CTD	8.702e-05	1	0.00104	0.01072	2	7	TNF,IL6
1358	ctd:C519562	imetelstat	CTD	8.702e-05	1	0.00104	0.01072	2	7	FLT1,KDR
1359	ctd:D004177	Dipyrone	CTD	8.702e-05	1	0.00104	0.01072	2	7	TNF,IL6
1360	CID006438640	6alpha-tigloyloxychaparrinone	Stitch	8.702e-05	1	0.00104	0.01072	2	7	EPO,HIF1A
1361	ctd:C108036	4'-hydroxydiclofenac	CTD	8.702e-05	1	0.00104	0.01072	2	7	GSTP1,TNF
1362	ctd:C051414	hydroxygenkwanin	CTD	8.702e-05	1	0.00104	0.01072	2	7	CASP8,TNF
1363	ctd:C014638	beta-lapachone	CTD	8.702e-05	1	0.00104	0.01072	2	7	GSTP1,TNF
1364	ctd:C044613	angelicae sinensis extract	CTD	8.702e-05	1	0.00104	0.01072	2	7	EPO,TNF
1365	CID000127963	SDZ 880.431	Stitch	8.702e-05	1	0.00104	0.01072	2	7	C3,TNF
1366	ctd:C094868	SB 206553	CTD	8.702e-05	1	0.00104	0.01072	2	7	TNF,IL6
1367	ctd:C043237	Klebsiella O3 lipopolysaccharide	CTD	8.702e-05	1	0.00104	0.01072	2	7	TNF,IL6
1368	ctd:C030107	enterotoxin F, Staphylococcal	CTD	8.702e-05	1	0.00104	0.01072	2	7	TNF,IL6
1369	ctd:C005106	methylbenzethonium chloride	CTD	8.702e-05	1	0.00104	0.01072	2	7	CCL5,VEGFA
1370	CID000006543	pp175	Stitch	8.702e-05	1	0.00104	0.01072	2	7	IGF1,IGF1R
1371	CID000151395	TcIP	Stitch	8.702e-05	1	0.00104	0.01072	2	7	TNF,IL6
1372	ctd:C000592118	ONO-8430506	CTD	8.702e-05	1	0.00104	0.01072	2	7	TNF,VEGFA
1373	CID000042844	1,2,7,8-tetrachlorodibenzofuran	Stitch	8.702e-05	1	0.00104	0.01072	2	7	IGF1,IGF1R
1374	ctd:C100122	meclocycline	CTD	8.702e-05	1	0.00104	0.01072	2	7	CCL5,VEGFA
1375	CID000081116	m4-A	Stitch	8.702e-05	1	0.00104	0.01072	2	7	IGF1,IGF1R
1376	CID003035625	AC1MHZOP	Stitch	8.702e-05	1	0.00104	0.01072	2	7	IGF1,C3
1377	CID000046876	S 36	Stitch	8.702e-05	1	0.00104	0.01072	2	7	IGF1,IL6
1378	ctd:D000893	Anti-Inflammatory Agents	CTD	8.702e-05	1	0.00104	0.01072	2	7	TNF,IL6
1379	ctd:D011442	Proscillaridin	CTD	8.702e-05	1	0.00104	0.01072	2	7	CCL5,VEGFA
1380	CID005311025	BIM-23027	Stitch	8.702e-05	1	0.00104	0.01072	2	7	IGF1,VEGFA
1381	ctd:C586321	mansonone G	CTD	8.702e-05	1	0.00104	0.01072	2	7	NAMPT,TNF
1382	ctd:C058808	praeruptorin C	CTD	8.702e-05	1	0.00104	0.01072	2	7	TNF,IL6
1383	ctd:C587573	myrrh resin	CTD	8.702e-05	1	0.00104	0.01072	2	7	IL6,VEGFA
1384	ctd:C056498	aceclofenac	CTD	8.702e-05	1	0.00104	0.01072	2	7	TNF,IL6
1385	ctd:C529348	CNB 001	CTD	8.702e-05	1	0.00104	0.01072	2	7	TNF,IL6
1386	ctd:C012195	asarone	CTD	8.702e-05	1	0.00104	0.01072	2	7	TNF,IL6
1387	ctd:C541028	bis(3-hydroxyphenyl) diselenide	CTD	8.702e-05	1	0.00104	0.01072	2	7	TNF,IL6
1388	ctd:C037473	nickel hydroxide (II)	CTD	8.702e-05	1	0.00104	0.01072	2	7	TNF,IL6
1389	ctd:D008934	Mitogens	CTD	8.702e-05	1	0.00104	0.01072	2	7	TNF,IL6
1390	ctd:C496879	103D5R	CTD	8.702e-05	1	0.00104	0.01072	2	7	HIF1A,VEGFA
1391	ctd:C048220	paxilline	CTD	8.702e-05	1	0.00104	0.01072	2	7	FLT1,TNF
1392	ctd:C025583	sesamol	CTD	8.702e-05	1	0.00104	0.01072	2	7	CASP8,TNF
1393	ctd:C012353	hydroperoxyisophosphamide	CTD	8.702e-05	1	0.00104	0.01072	2	7	GSTP1,CASP8
1394	ctd:C001687	maytenonic acid	CTD	8.702e-05	1	0.00104	0.01072	2	7	TNF,IL6
1395	ctd:D009838	Oligodeoxyribonucleotides	CTD	8.702e-05	1	0.00104	0.01072	2	7	TNF,IL6
1396	ctd:C528574	astressin-2B	CTD	8.702e-05	1	0.00104	0.01072	2	7	TNF,IL6
1397	ctd:D020110	Pinacidil	CTD	8.702e-05	1	0.00104	0.01072	2	7	CASP8,TNF
1398	ctd:C000666	coralyne	CTD	8.702e-05	1	0.00104	0.01072	2	7	CCL5,VEGFA
1399	ctd:C059451	lornoxicam	CTD	8.702e-05	1	0.00104	0.01072	2	7	IGF1,IL6
1400	ctd:C012714	aluminum phosphate	CTD	8.702e-05	1	0.00104	0.01072	2	7	TNF,IL6
1401	ctd:C083295	prunetin	CTD	8.702e-05	1	0.00104	0.01072	2	7	TNF,IL6
1402	ctd:D016190	Carboplatin	CTD	8.704e-05	1	0.00104	0.01072	4	113	GSTP1,EPO,TNF,IL6
1403	CID000005470	AC1L1KF5	Stitch	8.704e-05	1	0.00104	0.01072	4	113	IGF1,NOS3,IL6,VEGFA
1404	ctd:C002469	fusarenon-X	CTD	8.946e-05	1	0.001065	0.01097	3	42	CASP8,TNF,IL6
1405	CID000004138	L-alpha-methyldopa	Stitch	8.946e-05	1	0.001065	0.01097	3	42	ACE,F5,PRL
1406	CID004628822	AC1NDNVX	Stitch	8.946e-05	1	0.001065	0.01097	3	42	EPO,TNF,VEGFA
1407	ctd:C022830	2-methoxyestradiol	CTD	8.946e-05	1	0.001065	0.01097	3	42	HIF1A,CASP8,VEGFA
1408	ctd:D012406	Roxarsone	CTD	8.946e-05	1	0.001065	0.01097	3	42	ANGPT1,NOS3,VEGFA
1409	CID000011443	2,4-TDI	Stitch	8.946e-05	1	0.001065	0.01097	3	42	GSTP1,HLA-A,CCL5
1410	CID004475485	AC1NAE4O	Stitch	9.318e-05	1	0.001108	0.01142	4	115	TNF,NOS3,IL6,CYBA
1411	CID000000187	acetylcholine	Stitch	9.459e-05	1	0.001124	0.01158	6	361	HIF1A,CASP8,ACE,NOS3,PRL,CYBA
1412	CID000005591	troglitazone	Stitch	9.534e-05	1	0.001132	0.01167	7	526	GSTP1,LRP5,CASP8,TNF,NOS3,IL6,VEGFA
1413	CID000003660	AC1L1GFH	Stitch	9.603e-05	1	0.001136	0.01171	3	43	KDR,IL6,VEGFA
1414	ctd:D016226	Phosphorus, Dietary	CTD	9.603e-05	1	0.001136	0.01171	3	43	IGF1,IL6,BDNF
1415	ctd:C115461	SC 560	CTD	9.603e-05	1	0.001136	0.01171	3	43	CASP8,TNF,IL6
1416	CID005311506	Zm241385	Stitch	9.603e-05	1	0.001136	0.01171	3	43	CCL5,TNF,VEGFA
1417	CID000010536	3beta-hydroxy-5-spirostene	Stitch	9.603e-05	1	0.001136	0.01171	3	43	CASP8,TNF,VEGFA
1418	CID000114777	theaflavin	Stitch	9.66e-05	1	0.001142	0.01177	5	224	EPO,KDR,TNF,IL6,LGALS1
1419	CID000006026	kinin 9	Stitch	9.75e-05	1	0.001152	0.01187	6	363	F2,ACE,NOS3,IL6,BDNF,VEGFA
1420	CID005326972	DB04680	Stitch	9.864e-05	1	0.001165	0.012	5	225	HLA-A,HLA-B,HLA-DRB1,CASP8,TNF
1421	ctd:D019829	Nevirapine	CTD	9.962e-05	1	0.001174	0.0121	4	117	GSTP1,NAMPT,IL6,VEGFA
1422	CID004473765	AC1NBU2S	Stitch	9.962e-05	1	0.001174	0.0121	4	117	HLA-DRB1,TNF,IL6,PRL
1423	ctd:D009536	Niacinamide	CTD	9.962e-05	1	0.001174	0.0121	4	117	NAMPT,TNF,IL6,CYBA
1424	ctd:D008694	Methamphetamine	CTD	0.0001026	1	0.001208	0.01245	11	1401	ARG2,GSTP1,FLT1,ANGPT2,CCL5,TNF,ATF4,IL6,PRL,BDNF,VEGFA
1425	CID006325610	melanin	Stitch	0.0001028	1	0.00121	0.01247	5	227	IGF1,SCG3,TNF,IL6,VEGFA
1426	CID000025439	NSC3364	Stitch	0.000103	1	0.00121	0.01247	4	118	MTHFR,CCL5,C5,NOS3
1427	CID000005461	TXB2 (thromboxane B2	Stitch	0.000103	1	0.00121	0.01247	4	118	TNF,C5,F2,IL6
1428	ctd:D012969	Sodium Fluoride	CTD	0.0001059	1	0.001244	0.01281	9	934	ARG2,EPHX2,IGF1,CASP8,TNF,ATF4,IHH,IL6,LGALS1
1429	ctd:D012110	Reserpine	CTD	0.0001064	1	0.001245	0.01283	4	119	CASP8,C3,PRL,BDNF
1430	ctd:D010261	Paraoxon	CTD	0.0001064	1	0.001245	0.01283	4	119	CASP8,TNF,IL6,VEGFA
1431	CID005353980	sulphasalazine	Stitch	0.0001064	1	0.001245	0.01283	4	119	CCL5,TNF,NOS3,IL6
1432	CID000024385	NiCl2	Stitch	0.0001064	1	0.001245	0.01283	4	119	ARG2,F5,IL6,VEGFA
1433	CID000012332	hexanamide	Stitch	0.0001064	1	0.001245	0.01283	4	119	HLA-A,HLA-B,CCL5,TNF
1434	CID000004584	AC1L1IHP	Stitch	0.0001097	1	0.00128	0.01319	8	728	HIF1A,IGF1,IGF1R,TNF,F2,PRL,BDNF,VEGFA
1435	ctd:C001277	geldanamycin	CTD	0.0001099	1	0.00128	0.01319	6	371	FLT1,HIF1A,ANGPT1,MALAT1,TNF,IL6
1436	ctd:D012601	Scopolamine Hydrobromide	CTD	0.0001099	1	0.00128	0.01319	4	120	ARG2,TNF,IL6,BDNF
1437	ctd:D005439	Flufenamic Acid	CTD	0.0001101	1	0.00128	0.01319	3	45	GSTP1,TNF,IL6
1438	CID000465968	KRH-1636	Stitch	0.0001101	1	0.00128	0.01319	3	45	HIF1A,CCL5,IL6
1439	ctd:C016274	bromoacetate	CTD	0.0001101	1	0.00128	0.01319	3	45	CASP8,TNF,IL6
1440	CID000176408	SCH 58261	Stitch	0.0001101	1	0.00128	0.01319	3	45	ANGPT2,NOS3,BDNF
1441	ctd:D014992	Xylenes	CTD	0.0001101	1	0.00128	0.01319	3	45	NAMPT,ACE,IL6
1442	ctd:C085514	wogonin	CTD	0.0001101	1	0.00128	0.01319	3	45	HIF1A,CASP8,TNF
1443	CID005311048	dichloromethanediamine	Stitch	0.000111	1	0.001289	0.01329	7	539	GSTP1,EPO,HIF1A,IGF1,IGF1R,CASP8,TNF
1444	CID000003447	gabexate mesilate	Stitch	0.0001135	1	0.001315	0.01355	4	121	TNF,F2,NOS3,IL6
1445	ctd:C413684	salicylaldehyde isonicotinoyl hydrazone	CTD	0.0001159	1	0.001315	0.01355	2	8	HIF1A,CASP8
1446	ctd:C570406	2-chloro-4'-methoxychalcone	CTD	0.0001159	1	0.001315	0.01355	2	8	TNF,IL6
1447	ctd:D005732	Gangliosides	CTD	0.0001159	1	0.001315	0.01355	2	8	TNF,IL6
1448	ctd:C475622	4-cyclohexylmethoxy-5-nitrosopyrimidine-2,6-diamine	CTD	0.0001159	1	0.001315	0.01355	2	8	CASP8,TNF
1449	DB00028	Intravenous Immunoglobulin	Drug Bank	0.0001159	1	0.001315	0.01355	2	8	C3,C5
1450	ctd:C100807	ethyl N-allyl-N-(2-methyl-3-(4-(4-amidinophenoxycarbonyl)phenyl)propenoyl)aminoacetate methanesulfonate	CTD	0.0001159	1	0.001315	0.01355	2	8	TNF,IL6
1451	DB01268	Sunitinib	Drug Bank	0.0001159	1	0.001315	0.01355	2	8	FLT1,KDR
1452	CID000002693	NSC289491	Stitch	0.0001159	1	0.001315	0.01355	2	8	HIF1A,EPAS1
1453	ctd:C466997	CGP 57380	CTD	0.0001159	1	0.001315	0.01355	2	8	TNF,IL6
1454	ctd:D000085	Acetates	CTD	0.0001159	1	0.001315	0.01355	2	8	TNF,IL6
1455	ctd:D037361	Adenylate Cyclase Toxin	CTD	0.0001159	1	0.001315	0.01355	2	8	TNF,IL6
1456	ctd:D064801	Phospholipase A2 Inhibitors	CTD	0.0001159	1	0.001315	0.01355	2	8	TNF,IL6
1457	ctd:D004852	Epoxy Compounds	CTD	0.0001159	1	0.001315	0.01355	2	8	EPHX2,TNF
1458	ctd:D002233	Carbocysteine	CTD	0.0001159	1	0.001315	0.01355	2	8	TNF,VEGFA
1459	ctd:C064093	phlorofucofuroeckol A	CTD	0.0001159	1	0.001315	0.01355	2	8	TNF,IL6
1460	ctd:D017985	Dalteparin	CTD	0.0001159	1	0.001315	0.01355	2	8	TNF,F2
1461	CID000007165	ethyl benzoate	Stitch	0.0001159	1	0.001315	0.01355	2	8	CASP8,LGALS1
1462	ctd:C071435	BAY u9773	CTD	0.0001159	1	0.001315	0.01355	2	8	TNF,IL6
1463	ctd:D011419	Propidium	CTD	0.0001159	1	0.001315	0.01355	2	8	CCL5,VEGFA
1464	ctd:C033363	beta-1,3-glucan	CTD	0.0001159	1	0.001315	0.01355	2	8	TNF,IL6
1465	ctd:C419664	udenafil	CTD	0.0001159	1	0.001315	0.01355	2	8	HIF1A,NOS3
1466	ctd:D013929	Thromboxane B2	CTD	0.0001159	1	0.001315	0.01355	2	8	TNF,F2
1467	ctd:C115121	LY 353381	CTD	0.0001159	1	0.001315	0.01355	2	8	IGF1,IGF1R
1468	ctd:C006048	imidazolidinyl urea	CTD	0.0001159	1	0.001315	0.01355	2	8	IL6,VEGFA
1469	ctd:D008982	Molybdenum	CTD	0.0001159	1	0.001315	0.01355	2	8	CASP8,PRL
1470	CID000072376	narciclasine	Stitch	0.0001159	1	0.001315	0.01355	2	8	CASP8,TNF
1471	ctd:C001570	alexidine	CTD	0.0001159	1	0.001315	0.01355	2	8	CCL5,VEGFA
1472	ctd:D008750	Methyldopa	CTD	0.0001159	1	0.001315	0.01355	2	8	GSTP1,PRL
1473	ctd:C026967	Amb a I protein, Ambrosia artemisiifolia	CTD	0.0001159	1	0.001315	0.01355	2	8	TNF,IL6
1474	ctd:D006027	Glycosides	CTD	0.0001159	1	0.001315	0.01355	2	8	TNF,IL6
1475	ctd:C529769	GSK0660	CTD	0.0001159	1	0.001315	0.01355	2	8	TNF,NOS3
1476	ctd:D020105	Milrinone	CTD	0.0001159	1	0.001315	0.01355	2	8	TNF,IL6
1477	ctd:C517830	arzanol	CTD	0.0001159	1	0.001315	0.01355	2	8	TNF,IL6
1478	ctd:C528327	TG101348	CTD	0.0001159	1	0.001315	0.01355	2	8	IL6,VEGFA
1479	CID000000281	carbon monoxide	Stitch	0.0001162	1	0.001317	0.01357	5	233	EPO,TNF,NOS3,VEGFA,CYBA
1480	ctd:D002762	Cholecalciferol	CTD	0.0001162	1	0.001317	0.01357	5	233	HIF1A,C3,TNF,IL6,VEGFA
1481	CID000387042	adaphostin	Stitch	0.0001176	1	0.001329	0.01369	3	46	GSTP1,FLT1,VEGFA
1482	CID000005409	AC1L1KAK	Stitch	0.0001176	1	0.001329	0.01369	3	46	IGF1,IHH,PRL
1483	CID005311080	endomorphin-1	Stitch	0.0001176	1	0.001329	0.01369	3	46	TNF,NOS3,BDNF
1484	ctd:D000496	Alloxan	CTD	0.0001176	1	0.001329	0.01369	3	46	TNF,NOS3,IL6
1485	ctd:C049584	2-amino-1-methyl-6-phenylimidazo(4,5-b)pyridine	CTD	0.0001188	1	0.001342	0.01383	7	545	GSTP1,HIF1A,CASP8,TNF,ATF4,IL6,PRL
1486	CID000027991	DDAVP	Stitch	0.0001209	1	0.001364	0.01405	4	123	EPO,F2,F5,IL6
1487	CID000004091	metformin	Stitch	0.000121	1	0.001364	0.01405	5	235	IGF1,NAMPT,TNF,ACE,IL6
1488	ctd:D019308	Palmitic Acid	CTD	0.0001247	1	0.001406	0.01448	4	124	TNF,NOS3,IL6,CYBA
1489	ctd:D015242	Ofloxacin	CTD	0.0001254	1	0.001408	0.01451	3	47	CASP8,TNF,IL6
1490	CID000389644	AC1L8YDS	Stitch	0.0001254	1	0.001408	0.01451	3	47	IGF1,IGF1R,LGALS1
1491	CID000160754	RI-331	Stitch	0.0001254	1	0.001408	0.01451	3	47	EPO,HIF1A,VEGFA
1492	CID000002663	celiprolol	Stitch	0.0001254	1	0.001408	0.01451	3	47	ACE,NOS3,CYBA
1493	CID005745214	CNI-1493	Stitch	0.0001254	1	0.001408	0.01451	3	47	C3,TNF,IL6
1494	ctd:D018119	Stavudine	CTD	0.0001254	1	0.001408	0.01451	3	47	GSTP1,TNF,IL6
1495	CID000005753	corticosterone	Stitch	0.000127	1	0.001425	0.01468	6	381	IGF1,TNF,NOS3,IL6,PRL,BDNF
1496	CID000002375	bicalutamide	Stitch	0.0001287	1	0.001441	0.01485	4	125	HIF1A,IGF1,IL6,PRL
1497	CID000150310	Selara	Stitch	0.0001287	1	0.001441	0.01485	4	125	ACE,NOS3,PRL,CYBA
1498	ctd:D015741	Metribolone	CTD	0.0001288	1	0.001442	0.01486	6	382	ARG2,EPHX2,IGF1,IGF1R,NAA15,IL6
1499	CID000086222	Spotlight	Stitch	0.0001327	1	0.001482	0.01527	4	126	IGF1,CASP8,IL6,BDNF
1500	CID000444766	1c88	Stitch	0.0001327	1	0.001482	0.01527	4	126	IGF1,TNF,NOS3,IL6
1501	CID001349907	methimazole	Stitch	0.0001327	1	0.001482	0.01527	4	126	IGF1,TNF,ACE,IL6
1502	CID000002803	clonidine	Stitch	0.0001335	1	0.001483	0.01528	5	240	IGF1,KDR,TNF,ACE,PRL
1503	ctd:D026023	Permethrin	CTD	0.0001335	1	0.001483	0.01528	5	240	GSTP1,CCL5,TNF,IL6,BDNF
1504	ctd:D008095	Lithocholic Acid	CTD	0.0001335	1	0.001483	0.01528	5	240	HLA-B,CASP8,TNF,IL6,VEGFA
1505	ctd:D003999	Dichloroacetic Acid	CTD	0.0001335	1	0.001483	0.01528	9	963	HIF1A,CASP8,TNF,C5,IHH,F2,F5,IL6,BDNF
1506	CID000159594	atrasentan	Stitch	0.0001336	1	0.001483	0.01528	3	48	HIF1A,NOS3,VEGFA
1507	CID000014806	zinc oxide	Stitch	0.0001336	1	0.001483	0.01528	3	48	IGF1,IGF1R,VEGFA
1508	ctd:C067431	letrozole	CTD	0.0001336	1	0.001483	0.01528	3	48	ANGPT2,TNF,EPAS1
1509	ctd:C005563	captax	CTD	0.0001336	1	0.001483	0.01528	3	48	TNF,IL6,VEGFA
1510	ctd:C024989	coenzyme Q10	CTD	0.0001336	1	0.001483	0.01528	3	48	CASP8,TNF,NOS3
1511	ctd:C007379	diethyl phthalate	CTD	0.0001336	1	0.001483	0.01528	3	48	IGF1,CASP8,TNF
1512	CID000002390	AC1L1DKK	Stitch	0.0001368	1	0.001517	0.01563	4	127	IGF1,NOS3,IL6,PRL
1513	CID000003541	AC1MBZ1C	Stitch	0.0001383	1	0.001533	0.01579	6	387	TNF,NOS3,IL6,PRL,BDNF,VEGFA
1514	ctd:C012655	nimesulide	CTD	0.0001392	1	0.001542	0.01589	10	1201	GSTP1,IGF1,NAMPT,LRP5,CASP8,TNF,ATF4,F2,IL6,VEGFA
1515	ctd:D011084	Polycyclic Aromatic Hydrocarbons	CTD	0.000141	1	0.00156	0.01608	4	128	GSTP1,TNF,NOS3,IL6
1516	CID000000237	quinacrine	Stitch	0.0001415	1	0.001564	0.01612	5	243	GSTP1,TNF,F2,NOS3,PRL
1517	CID000447280	Apstatin	Stitch	0.0001421	1	0.001569	0.01616	3	49	IGF1R,HLA-A,ACE
1518	ctd:D014315	Triterpenes	CTD	0.0001421	1	0.001569	0.01616	3	49	GSTP1,TNF,IL6
1519	CID000062924	Fluticaps	Stitch	0.0001421	1	0.001569	0.01616	3	49	CCL5,TNF,IL6
1520	ctd:C009277	sodium arsenate	CTD	0.0001441	1	0.001589	0.01638	12	1720	EPHX2,GSTP1,HIF1A,IGF1,IGF1R,NAA15,MTHFR,MALAT1,CASP8,TNF,ATF4,BDNF
1521	ctd:D003024	Clozapine	CTD	0.0001442	1	0.00159	0.01638	6	390	GSTP1,IGF1,MTHFR,TNF,PRL,BDNF
1522	ctd:D013654	Taurine	CTD	0.0001453	1	0.001596	0.01645	4	129	TNF,IL6,BDNF,VEGFA
1523	ctd:D054659	Diketopiperazines	CTD	0.0001488	1	0.001596	0.01645	2	9	TNF,IL6
1524	ctd:C570295	labdanolic acid methyl ester	CTD	0.0001488	1	0.001596	0.01645	2	9	TNF,IL6
1525	ctd:C114999	K-12 lipopolysaccharide	CTD	0.0001488	1	0.001596	0.01645	2	9	TNF,IL6
1526	CID000448671	YF-3	Stitch	0.0001488	1	0.001596	0.01645	2	9	KDR,VEGFA
1527	DB00125	L-Arginine	Drug Bank	0.0001488	1	0.001596	0.01645	2	9	ARG2,NOS3
1528	ctd:C063587	juzentaihoto	CTD	0.0001488	1	0.001596	0.01645	2	9	TNF,IL6
1529	CID000133000	embusartan	Stitch	0.0001488	1	0.001596	0.01645	2	9	HLA-DRB1,ACE
1530	ctd:C057912	homoorientin	CTD	0.0001488	1	0.001596	0.01645	2	9	TNF,IL6
1531	ctd:C057916	17-hydroxyjolkinolide B	CTD	0.0001488	1	0.001596	0.01645	2	9	TNF,IL6
1532	CID000124025	procyanidin A2	Stitch	0.0001488	1	0.001596	0.01645	2	9	HLA-A,HLA-B
1533	CID006481891	CA-13	Stitch	0.0001488	1	0.001596	0.01645	2	9	IGF1,IGF1R
1534	ctd:C535211	7,14-dihydroxydocosa-4,8,10,12,16,19-hexaenoic acid	CTD	0.0001488	1	0.001596	0.01645	2	9	TNF,IL6
1535	ctd:C513533	CpG ODN 2006	CTD	0.0001488	1	0.001596	0.01645	2	9	TNF,IL6
1536	ctd:C465548	bifendate	CTD	0.0001488	1	0.001596	0.01645	2	9	TNF,IL6
1537	ctd:D013110	Sphingosine	CTD	0.0001488	1	0.001596	0.01645	2	9	PRL,VEGFA
1538	ctd:C548902	FLLL 32	CTD	0.0001488	1	0.001596	0.01645	2	9	CASP8,IL6
1539	ctd:C524883	5,7-dihydroxy-3-(3-hydroxy-4-methoxybenzyl)-6-methoxychroman-4-one	CTD	0.0001488	1	0.001596	0.01645	2	9	TNF,VEGFA
1540	CID005479139	AC1NUHTW	Stitch	0.0001488	1	0.001596	0.01645	2	9	IGF1,IGF1R
1541	CID000091736	Espirapril	Stitch	0.0001488	1	0.001596	0.01645	2	9	C3,ACE
1542	ctd:D015363	Quinolones	CTD	0.0001488	1	0.001596	0.01645	2	9	HIF1A,VEGFA
1543	ctd:C500809	flavokawain A	CTD	0.0001488	1	0.001596	0.01645	2	9	TNF,IL6
1544	ctd:C525063	2'-fluoro-6,7-methylenedioxy-2-phenyl-4-quinolone	CTD	0.0001488	1	0.001596	0.01645	2	9	IGF1,IGF1R
1545	ctd:D012715	Sesame Oil	CTD	0.0001488	1	0.001596	0.01645	2	9	TNF,IL6
1546	ctd:C035933	sophocarpine	CTD	0.0001488	1	0.001596	0.01645	2	9	TNF,IL6
1547	ctd:D000620	Aminoimidazole Carboxamide	CTD	0.0001488	1	0.001596	0.01645	2	9	TNF,IL6
1548	ctd:C093373	cariporide	CTD	0.0001488	1	0.001596	0.01645	2	9	GSTP1,TNF
1549	ctd:D012368	4-(3-Butoxy-4-methoxybenzyl)-2-imidazolidinone	CTD	0.0001488	1	0.001596	0.01645	2	9	TNF,IL6
1550	ctd:C470213	capsiate	CTD	0.0001488	1	0.001596	0.01645	2	9	IGF1,VEGFA
1551	ctd:C001579	astragalin	CTD	0.0001488	1	0.001596	0.01645	2	9	TNF,IL6
1552	ctd:D008801	Mexiletine	CTD	0.0001488	1	0.001596	0.01645	2	9	TNF,IL6
1553	ctd:D008717	Methionine Sulfoximine	CTD	0.0001488	1	0.001596	0.01645	2	9	CCL5,VEGFA
1554	CID000013619	2,3,5-trichlorophenol	Stitch	0.0001488	1	0.001596	0.01645	2	9	C3,C5
1555	ctd:C013613	neohesperidin dihydrochalcone	CTD	0.0001488	1	0.001596	0.01645	2	9	CASP8,IL6
1556	ctd:C119092	tigecycline	CTD	0.0001488	1	0.001596	0.01645	2	9	TNF,IL6
1557	ctd:C097470	4'-methoxychalcone	CTD	0.0001488	1	0.001596	0.01645	2	9	TNF,IL6
1558	ctd:C456319	PS1145	CTD	0.0001488	1	0.001596	0.01645	2	9	TNF,VEGFA
1559	CID000132977	Fce 26644	Stitch	0.0001488	1	0.001596	0.01645	2	9	IGF1,IGF1R
1560	CID003080768	Gly-pro-glu	Stitch	0.0001488	1	0.001596	0.01645	2	9	IGF1,BDNF
1561	ctd:C036658	acrylic acid	CTD	0.0001488	1	0.001596	0.01645	2	9	TNF,IL6
1562	ctd:C095170	4-aminobenzoyl-glycyl-prolyl-leucyl-alanine hydroxamic acid	CTD	0.0001488	1	0.001596	0.01645	2	9	TNF,BDNF
1563	ctd:D022621	Shiga Toxin	CTD	0.0001488	1	0.001596	0.01645	2	9	TNF,IL6
1564	CID005288910	H type 2	Stitch	0.0001497	1	0.001602	0.0165	4	130	HLA-A,HLA-B,HLA-DRB1,TNF
1565	CID000073318	8-OHdG	Stitch	0.0001497	1	0.001602	0.0165	4	130	GSTP1,NOS3,IL6,CYBA
1566	ctd:D011899	Ranitidine	CTD	0.0001497	1	0.001602	0.0165	4	130	TNF,IL6,PRL,VEGFA
1567	ctd:D005632	Fructose	CTD	0.0001498	1	0.001602	0.0165	5	246	TNF,ATF4,ACE,NOS3,IL6
1568	CID000036523	Factrel	Stitch	0.0001498	1	0.001602	0.0165	5	246	IGF1,IGF1R,IHH,PRL,VEGFA
1569	CID000000294	maltos	Stitch	0.0001504	1	0.001607	0.01656	6	393	IGF1,TNF,C5,F2,PRL,LGALS1
1570	CID000065923	WEB 2170	Stitch	0.000151	1	0.001608	0.01657	3	50	TNF,F2,IL6
1571	CID000026331	Moldin	Stitch	0.000151	1	0.001608	0.01657	3	50	MTHFR,C3,BDNF
1572	CID000002324	KW-3049	Stitch	0.000151	1	0.001608	0.01657	3	50	ACE,NOS3,CYBA
1573	CID005357439	1 SRE	Stitch	0.000151	1	0.001608	0.01657	3	50	EPO,HLA-A,VEGFA
1574	ctd:D000420	Albuterol	CTD	0.000151	1	0.001608	0.01657	3	50	CCL5,TNF,IL6
1575	ctd:D014302	Trinitrobenzenesulfonic Acid	CTD	0.0001524	1	0.001623	0.01672	6	394	ARG2,IGF1,C3,TNF,IL6,VEGFA
1576	CID000003503	gossypol	Stitch	0.0001526	1	0.001623	0.01672	5	247	HLA-B,CASP8,F2,ACE,BDNF
1577	CID000000169	6-trans-leukotriene B4	Stitch	0.0001526	1	0.001623	0.01672	5	247	EPHX2,CCL5,TNF,C5,IL6
1578	CID000003977	NSC407322	Stitch	0.0001542	1	0.001637	0.01687	4	131	IGF1,CASP8,TNF,IL6
1579	CID000003194	ebselen	Stitch	0.0001542	1	0.001637	0.01687	4	131	TNF,NOS3,IL6,CYBA
1580	CID000002826	pseudococaine	Stitch	0.0001568	1	0.001664	0.01714	7	570	NAMPT,CCL5,TNF,NOS3,IL6,PRL,BDNF
1581	ctd:C032668	1-nitropyrene	CTD	0.0001585	1	0.00168	0.01731	5	249	HIF1A,CASP8,CCL5,TNF,IL6
1582	CID000037783	PDBu	Stitch	0.0001585	1	0.00168	0.01731	5	249	HLA-A,C3,F2,NOS3,PRL
1583	CID000065948	azelnidipine	Stitch	0.0001602	1	0.001685	0.01736	3	51	TNF,ACE,NOS3
1584	CID000119086	ORG 2058	Stitch	0.0001602	1	0.001685	0.01736	3	51	IGF1R,PRL,LGALS1
1585	CID000012111	bisphenol F	Stitch	0.0001602	1	0.001685	0.01736	3	51	HLA-B,TNF,IL6
1586	ctd:C039726	artesunate	CTD	0.0001602	1	0.001685	0.01736	3	51	GSTP1,TNF,IL6
1587	CID000005478	racemic timolol	Stitch	0.0001602	1	0.001685	0.01736	3	51	HLA-DRB1,TNF,IL6
1588	ctd:D002108	Ceruletide	CTD	0.0001602	1	0.001685	0.01736	3	51	CASP8,TNF,IL6
1589	CID000003171	L-threo-DOPS	Stitch	0.0001602	1	0.001685	0.01736	3	51	EPO,PRL,EPAS1
1590	ctd:C504897	12-(3-adamantan-1-ylureido)dodecanoic acid	CTD	0.0001602	1	0.001685	0.01736	3	51	EPHX2,CASP8,TNF
1591	ctd:D009240	N-Formylmethionine Leucyl-Phenylalanine	CTD	0.0001602	1	0.001685	0.01736	3	51	TNF,IL6,VEGFA
1592	ctd:C008340	mecoprop	CTD	0.0001602	1	0.001685	0.01736	3	51	EPHX2,TNF,F2
1593	ctd:D006152	Cyclic GMP	CTD	0.0001602	1	0.001685	0.01736	3	51	EPO,TNF,NOS3
1594	CID000003733	AC1MU1S9	Stitch	0.0001602	1	0.001685	0.01736	7	572	CCL5,TNF,F2,NOS3,IL6,PRL,CYBA
1595	CID000448618	AC1L9M5N	Stitch	0.0001634	1	0.001716	0.01768	4	133	CCL5,TNF,C5,IL6
1596	ctd:D005996	Nitroglycerin	CTD	0.0001634	1	0.001716	0.01768	4	133	C3,TNF,NOS3,IL6
1597	CID000006053	DMAB	Stitch	0.0001634	1	0.001716	0.01768	4	133	IGF1,CASP8,IL6,BDNF
1598	CID000000214	8-isoprostaglandin E1	Stitch	0.0001645	1	0.001726	0.01779	5	251	TNF,F2,NOS3,IL6,VEGFA
1599	CID005353940	SB202190	Stitch	0.0001682	1	0.001764	0.01817	4	134	CASP8,TNF,IL6,CYBA
1600	CID011776156	2-phenyl-4,4,5,5-tetramethylimidazoline-1-oxyl-3-oxide	Stitch	0.0001697	1	0.001772	0.01826	3	52	NAMPT,CASP8,NOS3
1601	ctd:D015738	Famotidine	CTD	0.0001697	1	0.001772	0.01826	3	52	TNF,IL6,PRL
1602	ctd:C005499	honokiol	CTD	0.0001697	1	0.001772	0.01826	3	52	CASP8,TNF,IL6
1603	CID000114778	kahweol	Stitch	0.0001697	1	0.001772	0.01826	3	52	GSTP1,TNF,IL6
1604	CID000480764	8-prenylnaringenin	Stitch	0.0001697	1	0.001772	0.01826	3	52	IGF1,C3,IL6
1605	CID011954225	D00992	Stitch	0.0001697	1	0.001772	0.01826	3	52	HLA-A,C3,TNF
1606	CID011963547	2il2	Stitch	0.0001697	1	0.001772	0.01826	3	52	CCL5,TNF,IL6
1607	ctd:C101814	perfluoro-n-undecanoic acid	CTD	0.00017	1	0.001774	0.01828	6	402	ARG2,NAMPT,C3,F2,EPAS1,BDNF
1608	CID000005408	NSC9700	Stitch	0.0001708	1	0.001781	0.01835	7	578	HIF1A,IGF1,TNF,IHH,IL6,PRL,VEGFA
1609	ctd:C043211	carvedilol	CTD	0.0001731	1	0.001803	0.01858	4	135	TNF,ACE,NOS3,IL6
1610	CID000005073	risperidone	Stitch	0.000178	1	0.001854	0.0191	4	136	MTHFR,C3,PRL,BDNF
1611	CID000003702	indapamide	Stitch	0.0001797	1	0.001868	0.01924	3	53	F2,ACE,NOS3
1612	ctd:C030299	phenylhydrazine	CTD	0.0001797	1	0.001868	0.01924	3	53	EPO,TNF,VEGFA
1613	ctd:C047368	3-methylquercetin	CTD	0.0001797	1	0.001868	0.01924	3	53	TNF,NOS3,IL6
1614	CID000002676	AC1L1E7N	Stitch	0.0001831	1	0.001881	0.01938	4	137	TNF,ACE,NOS3,IL6
1615	CID006398444	AC1O4QI2	Stitch	0.0001831	1	0.001881	0.01938	4	137	C3,TNF,IL6,BDNF
1616	CID000000289	catechol	Stitch	0.0001836	1	0.001881	0.01938	5	257	GSTP1,CCL5,NOS3,IL6,PRL
1617	ctd:C005842	FD & C Yellow No. 6	CTD	0.0001857	1	0.001881	0.01938	2	10	TNF,IL6
1618	ctd:C016767	sulprostone	CTD	0.0001857	1	0.001881	0.01938	2	10	HIF1A,NOS3
1619	ctd:C003402	sapropterin	CTD	0.0001857	1	0.001881	0.01938	2	10	EPO,NOS3
1620	CID006441630	ethyl-2,5-dihydroxycinnamate	Stitch	0.0001857	1	0.001881	0.01938	2	10	IGF1,IGF1R
1621	ctd:D005520	Food Preservatives	CTD	0.0001857	1	0.001881	0.01938	2	10	PRL,BDNF
1622	ctd:C062258	Pasteurella multocida toxin	CTD	0.0001857	1	0.001881	0.01938	2	10	TNF,IL6
1623	CID000123777	AC1L3X9S	Stitch	0.0001857	1	0.001881	0.01938	2	10	IGF1,IGF1R
1624	ctd:C052853	5-hydroxydecanoic acid	CTD	0.0001857	1	0.001881	0.01938	2	10	FLT1,TNF
1625	ctd:C000588486	glycine propionyl carnitine	CTD	0.0001857	1	0.001881	0.01938	2	10	TNF,IL6
1626	ctd:C024075	styrofoam	CTD	0.0001857	1	0.001881	0.01938	2	10	C3,C5
1627	ctd:C570662	2-amino-8-(4-(2-hydroxyethoxy)cyclohexyl)-6-(6-methoxypyridin-3-yl)-4-methylpyrido(2,3-d)pyrimidin-7(8H)-one	CTD	0.0001857	1	0.001881	0.01938	2	10	HIF1A,VEGFA
1628	ctd:C568335	DCB-SLE1	CTD	0.0001857	1	0.001881	0.01938	2	10	TNF,IL6
1629	ctd:C439304	KMUP 1	CTD	0.0001857	1	0.001881	0.01938	2	10	TNF,BDNF
1630	CID006443665	hydroxysafflor yellow A	Stitch	0.0001857	1	0.001881	0.01938	2	10	HIF1A,NOS3
1631	ctd:C056684	soyasaponin I	CTD	0.0001857	1	0.001881	0.01938	2	10	TNF,IL6
1632	CID003013166	DAQ B1	Stitch	0.0001857	1	0.001881	0.01938	2	10	IGF1,CYBA
1633	CID000186002	AC1Q5QI1	Stitch	0.0001857	1	0.001881	0.01938	2	10	NOS3,CYBA
1634	ctd:C524250	N'-(11H-indolo(3,2-c)quinolin-6-yl)-N,N-dimethylethane-1,2-diamine	CTD	0.0001857	1	0.001881	0.01938	2	10	IL6,VEGFA
1635	ctd:C523074	allylpyrocatechol	CTD	0.0001857	1	0.001881	0.01938	2	10	TNF,VEGFA
1636	CID000078960	imidazo(1,2-a)pyridine	Stitch	0.0001857	1	0.001881	0.01938	2	10	HIF1A,IGF1R
1637	ctd:C017573	nonane	CTD	0.0001857	1	0.001881	0.01938	2	10	TNF,IL6
1638	CID000014055	cyanoacetylene	Stitch	0.0001857	1	0.001881	0.01938	2	10	C3,C5
1639	ctd:C006923	carvone	CTD	0.0001857	1	0.001881	0.01938	2	10	GSTP1,TNF
1640	ctd:D005976	Glutaral	CTD	0.0001857	1	0.001881	0.01938	2	10	TNF,IL6
1641	ctd:C105488	ONO 1301	CTD	0.0001857	1	0.001881	0.01938	2	10	TNF,CYBA
1642	ctd:D008050	Lipid A	CTD	0.0001857	1	0.001881	0.01938	2	10	TNF,IL6
1643	CID003035614	HFPA	Stitch	0.0001857	1	0.001881	0.01938	2	10	IGF1,F2
1644	ctd:C012997	gentiopicroside	CTD	0.0001857	1	0.001881	0.01938	2	10	CASP8,TNF
1645	ctd:C553921	amurensin G	CTD	0.0001857	1	0.001881	0.01938	2	10	HIF1A,NOS3
1646	ctd:C000620717	kuntai capsule	CTD	0.0001857	1	0.001881	0.01938	2	10	CASP8,TNF
1647	ctd:C011860	alpha-chaconine	CTD	0.0001857	1	0.001881	0.01938	2	10	TNF,IL6
1648	ctd:C540456	trikatu	CTD	0.0001857	1	0.001881	0.01938	2	10	TNF,IL6
1649	ctd:C045325	eupatilin	CTD	0.0001857	1	0.001881	0.01938	2	10	TNF,IL6
1650	ctd:C045621	miglitol	CTD	0.0001857	1	0.001881	0.01938	2	10	TNF,IL6
1651	ctd:D001558	Benzethonium	CTD	0.0001857	1	0.001881	0.01938	2	10	CCL5,VEGFA
1652	ctd:D001578	Benzopyrans	CTD	0.0001857	1	0.001881	0.01938	2	10	GSTP1,TNF
1653	ctd:C085278	hydroxysafflor yellow A	CTD	0.0001857	1	0.001881	0.01938	2	10	TNF,IL6
1654	CID000084759	4-aminoquinazoline	Stitch	0.0001857	1	0.001881	0.01938	2	10	KDR,VEGFA
1655	ctd:C011421	5-chloro-2-methyl-4-isothiazolin-3-one	CTD	0.0001857	1	0.001881	0.01938	2	10	IL6,VEGFA
1656	ctd:D045162	Thiazolidinediones	CTD	0.0001857	1	0.001881	0.01938	2	10	TNF,IL6
1657	CID000415676	NSC71948	Stitch	0.0001883	1	0.001903	0.01961	4	138	IGF1,CASP8,IL6,BDNF
1658	ctd:C472511	dimethylarsinous acid	CTD	0.0001883	1	0.001903	0.01961	4	138	HIF1A,TNF,ATF4,IL6
1659	CID000000813	potassium	Stitch	0.0001883	1	0.001903	0.01961	9	1008	IGF1,C3,TNF,F2,ACE,F5,NOS3,IL6,PRL
1660	ctd:C054649	3-(2-hydroxy-4-(1,1-dimethylheptyl)phenyl)-4-(3-hydroxypropyl)cyclohexanol	CTD	0.00019	1	0.001913	0.01971	3	54	TNF,IL6,PRL
1661	ctd:D003436	Croton Oil	CTD	0.00019	1	0.001913	0.01971	3	54	TNF,IL6,VEGFA
1662	ctd:C060728	cobalt oxide	CTD	0.00019	1	0.001913	0.01971	3	54	APLN,CASP8,TNF
1663	ctd:C025463	sulindac sulfone	CTD	0.00019	1	0.001913	0.01971	3	54	GSTP1,CASP8,TNF
1664	CID003465634	AC1MRBNS	Stitch	0.00019	1	0.001913	0.01971	3	54	HLA-A,HLA-B,KDR
1665	ctd:D060754	Equol	CTD	0.00019	1	0.001913	0.01971	3	54	IGF1R,NOS3,PRL
1666	CID000025500	nickel hydroxide	Stitch	0.0001903	1	0.001916	0.01974	5	259	CASP8,CCL5,TNF,IL6,VEGFA
1667	ctd:C118580	octylmethoxycinnamate	CTD	0.0001936	1	0.001944	0.02003	4	139	IGF1,IGF1R,BDNF,VEGFA
1668	CID000000735	geranylgeranyl pyrophosphate	Stitch	0.0001936	1	0.001944	0.02003	4	139	TNF,NOS3,IL6,VEGFA
1669	CID000011045	TNBS	Stitch	0.0001936	1	0.001944	0.02003	4	139	IGF1,TNF,NOS3,IL6
1670	CID000000323	coumarin	Stitch	0.0001936	1	0.001944	0.02003	4	139	GSTP1,TNF,F2,F5
1671	CID000003413	forskolin from Coleus forskohlii	Stitch	0.0001954	1	0.001961	0.0202	9	1013	IGF1,CASP8,TNF,F2,NOS3,IL6,PRL,BDNF,VEGFA
1672	ctd:D002101	Cacodylic Acid	CTD	0.0001973	1	0.001978	0.02038	5	261	GSTP1,IGF1R,CASP8,TNF,ATF4
1673	ctd:D003000	Clonidine	CTD	0.0002006	1	0.002006	0.02067	3	55	CASP8,TNF,PRL
1674	ctd:C023617	pregna-4,17-diene-3,16-dione	CTD	0.0002006	1	0.002006	0.02067	3	55	CASP8,TNF,VEGFA
1675	ctd:C009438	tetrandrine	CTD	0.0002006	1	0.002006	0.02067	3	55	CASP8,TNF,IL6
1676	ctd:C105686	SU 5402	CTD	0.0002006	1	0.002006	0.02067	3	55	HIF1A,KDR,TNF
1677	CID000107935	deguelin	Stitch	0.0002006	1	0.002006	0.02067	3	55	HIF1A,TNF,EPAS1
1678	ctd:D003840	Deoxycholic Acid	CTD	0.0002045	1	0.002042	0.02104	4	141	GSTP1,CCL5,TNF,IL6
1679	ctd:D000068877	Imatinib Mesylate	CTD	0.0002045	1	0.002042	0.02104	4	141	IGF1,CASP8,TNF,VEGFA
1680	ctd:C061133	tamibarotene	CTD	0.0002061	1	0.002057	0.0212	7	596	CCL5,TNF,IL6,BDNF,LGALS1,VEGFA,CYBA
1681	CID000001912	8-bromo-cAMP	Stitch	0.000208	1	0.002073	0.02136	5	264	ARG2,IGF1,F2,NOS3,PRL
1682	ctd:D008769	Methylnitronitrosoguanidine	CTD	0.000208	1	0.002073	0.02136	5	264	GSTP1,FLT1,HLA-DRB1,CASP8,BDNF
1683	ctd:D018038	Sodium Selenite	CTD	0.0002084	1	0.002076	0.02139	11	1518	TSPAN12,GSTP1,FLT1,IGF1,NAMPT,HLA-A,CASP8,TNF,IL6,EPAS1,VEGFA
1684	ctd:C041711	St. Thomas' Hospital cardioplegic solution	CTD	0.0002101	1	0.002089	0.02153	4	142	GSTP1,IGF1,KDR,VEGFA
1685	CID000003220	emodin	Stitch	0.0002101	1	0.002089	0.02153	4	142	TNF,NOS3,IL6,VEGFA
1686	CID000074607	9,11-octadecadienoic acid	Stitch	0.0002101	1	0.002089	0.02153	4	142	IGF1,TNF,IL6,PRL
1687	CID004568637	AC1ND2OB	Stitch	0.0002117	1	0.002095	0.02159	5	265	IGF1,C3,NOS3,IL6,PRL
1688	CID000014296	ligustrazine	Stitch	0.0002117	1	0.002095	0.02159	3	56	HIF1A,CASP8,TNF
1689	ctd:C546611	brevetoxin 2	CTD	0.0002117	1	0.002095	0.02159	3	56	CASP8,TNF,IL6
1690	ctd:C005705	sanguinarine	CTD	0.0002117	1	0.002095	0.02159	3	56	GSTP1,CASP8,TNF
1691	ctd:D010400	Penicillin G	CTD	0.0002117	1	0.002095	0.02159	3	56	KDR,TNF,IL6
1692	CID000151193	PTK/ZK	Stitch	0.0002117	1	0.002095	0.02159	3	56	EPO,FLT1,ANGPT1
1693	ctd:C044101	endotoxin, Escherichia coli	CTD	0.0002117	1	0.002095	0.02159	3	56	TNF,NOS3,IL6
1694	ctd:C013672	riddelliine	CTD	0.0002117	1	0.002095	0.02159	3	56	KDR,TNF,IL6
1695	ctd:D004113	Succimer	CTD	0.0002126	1	0.002103	0.02167	10	1265	ARG2,IGF1,IGF1R,ANGPT2,MALAT1,C3,CCL5,TNF,IHH,VEGFA
1696	CID000002199	AC1L1D59	Stitch	0.0002154	1	0.002128	0.02193	5	266	CASP8,TNF,IL6,BDNF,VEGFA
1697	CID000000875	tartarate	Stitch	0.0002154	1	0.002128	0.02193	5	266	IGF1,TNF,IHH,IL6,VEGFA
1698	ctd:D003976	Diazinon	CTD	0.0002157	1	0.00213	0.02195	11	1524	FZD4,IGF1,VASH1,CASP8,TNF,IL6,EPAS1,BDNF,LGALS1,VEGFA,CYBA
1699	CID006326972	selenocystein	Stitch	0.0002158	1	0.00213	0.02195	4	143	EPHX2,TNF,NOS3,IL6
1700	ctd:C013015	hesperetin	CTD	0.0002231	1	0.00218	0.02246	3	57	CCL5,TNF,IL6
1701	CID000175468	12-bromolaurate	Stitch	0.0002231	1	0.00218	0.02246	3	57	EPHX2,TNF,PRL
1702	ctd:D000069287	Capecitabine	CTD	0.0002231	1	0.00218	0.02246	3	57	HIF1A,NOS3,VEGFA
1703	ctd:D002066	Busulfan	CTD	0.0002231	1	0.00218	0.02246	3	57	GSTP1,CASP8,TNF
1704	CID000010805	MHPG	Stitch	0.0002231	1	0.00218	0.02246	3	57	NDP,PRL,BDNF
1705	ctd:D014873	Water Pollutants	CTD	0.0002231	1	0.00218	0.02246	3	57	FZD4,TNF,IL6
1706	CID000023403	tiadenol	Stitch	0.0002231	1	0.00218	0.02246	3	57	EPHX2,GSTP1,NAA15
1707	ctd:C499823	5S,12R,18R-trihydroxy-6Z,8E,10E,14Z,16E-eicosapentaenoic acid	CTD	0.0002267	1	0.00218	0.02246	2	11	TNF,IL6
1708	CID000015688	DiBAC	Stitch	0.0002267	1	0.00218	0.02246	2	11	HLA-A,NOS3
1709	CID000004760	phenindione	Stitch	0.0002267	1	0.00218	0.02246	2	11	F2,F5
1710	ctd:C475739	glutamyl-(2-(((3,4-dihydro-2,5,7,8-tetramethyl-2-(4,8,12-trimethyltridecyl)-2H-1-benzopyran-6-yl)oxy)carbonyl)-3-((2-(1H-indol-3-yl)ethyl)amino)-3-oxopropyl)-cysteinyl-glycine sodium salt	CTD	0.0002267	1	0.00218	0.02246	2	11	TNF,IL6
1711	ctd:C499731	resveratrol-4'-O-glucuronide	CTD	0.0002267	1	0.00218	0.02246	2	11	NAMPT,APLN
1712	CID000159982	justicidin A	Stitch	0.0002267	1	0.00218	0.02246	2	11	CASP8,TNF
1713	ctd:C099327	4-propylphenol	CTD	0.0002267	1	0.00218	0.02246	2	11	GSTP1,PRL
1714	CID000064981	arctigenin	Stitch	0.0002267	1	0.00218	0.02246	2	11	TNF,NOS3
1715	ctd:C052983	patchouli alcohol	CTD	0.0002267	1	0.00218	0.02246	2	11	TNF,IL6
1716	CID000133064	Mephe-pro-arg	Stitch	0.0002267	1	0.00218	0.02246	2	11	F2,LGALS1
1717	CID006918209	KSG-504	Stitch	0.0002267	1	0.00218	0.02246	2	11	TNF,IL6
1718	ctd:C416653	2-(3'-methoxyphenyl)-6-pyrrolidinyl-4-quinazolinone	CTD	0.0002267	1	0.00218	0.02246	2	11	CASP8,VEGFA
1719	CID000161057	zinc mesoporphyrin	Stitch	0.0002267	1	0.00218	0.02246	2	11	EPO,VEGFA
1720	ctd:D013473	Sunscreening Agents	CTD	0.0002267	1	0.00218	0.02246	2	11	PRL,BDNF
1721	ctd:D014641	Vanillic Acid	CTD	0.0002267	1	0.00218	0.02246	2	11	CASP8,NOS3
1722	ctd:C005066	borrelidin	CTD	0.0002267	1	0.00218	0.02246	2	11	CASP8,VEGFA
1723	ctd:D003868	Dequalinium	CTD	0.0002267	1	0.00218	0.02246	2	11	CCL5,VEGFA
1724	CID000079482	2-acetamidoacrylate	Stitch	0.0002267	1	0.00218	0.02246	2	11	EPO,HIF1A
1725	ctd:C490483	icilin	CTD	0.0002267	1	0.00218	0.02246	2	11	TNF,IL6
1726	ctd:C044919	deferiprone	CTD	0.0002267	1	0.00218	0.02246	2	11	HIF1A,TNF
1727	ctd:C477523	SC 514	CTD	0.0002267	1	0.00218	0.02246	2	11	TNF,IL6
1728	CID000440909	pimaradiene	Stitch	0.0002267	1	0.00218	0.02246	2	11	TNF,IL6
1729	CID000069414	mg 8	Stitch	0.0002267	1	0.00218	0.02246	2	11	C3,ACE
1730	ctd:D000975	Antioxidants	CTD	0.0002267	1	0.00218	0.02246	2	11	TNF,IL6
1731	CID006398429	AC1O4QHT	Stitch	0.0002267	1	0.00218	0.02246	2	11	ACE,F5
1732	ctd:D000894	Anti-Inflammatory Agents, Non-Steroidal	CTD	0.0002267	1	0.00218	0.02246	2	11	TNF,IL6
1733	ctd:C551307	soyasaponin Ab	CTD	0.0002267	1	0.00218	0.02246	2	11	TNF,IL6
1734	CID000072875	dodecyl sulfide	Stitch	0.0002267	1	0.00218	0.02246	2	11	IGF1,IGF1R
1735	ctd:C056189	di-n-butyltin	CTD	0.0002267	1	0.00218	0.02246	2	11	TNF,IL6
1736	ctd:C020174	WR 1065	CTD	0.0002267	1	0.00218	0.02246	2	11	GSTP1,CCL5
1737	ctd:C513115	1-(methylimino-N-oxy)-6-(2-morpholinoethoxy)-3-phenyl-1H-indene-2-carboxylic acid ethyl ester	CTD	0.0002267	1	0.00218	0.02246	2	11	KDR,VEGFA
1738	ctd:D010968	Plasticizers	CTD	0.0002267	1	0.00218	0.02246	2	11	PRL,BDNF
1739	ctd:C472668	AEOL 10150	CTD	0.0002267	1	0.00218	0.02246	2	11	TNF,IL6
1740	ctd:C529269	cholix toxin, Vibrio cholerae	CTD	0.0002267	1	0.00218	0.02246	2	11	CASP8,TNF
1741	CID000445664	AC1L9ICX	Stitch	0.0002267	1	0.00218	0.02246	2	11	NAA15,NOS3
1742	CID000168849	AC1Q6OAO	Stitch	0.0002267	1	0.00218	0.02246	2	11	IGF1,IGF1R
1743	ctd:C024603	Geraniin	CTD	0.0002267	1	0.00218	0.02246	2	11	TNF,IL6
1744	ctd:C107364	5,6,7-trimethoxyflavone	CTD	0.0002267	1	0.00218	0.02246	2	11	TNF,IL6
1745	CID000006331	borane	Stitch	0.0002269	1	0.00218	0.02246	5	269	EPO,HIF1A,ANGPT1,CASP8,TNF
1746	CID000002540	candesartan cilexetil	Stitch	0.0002276	1	0.002185	0.02252	4	145	ACE,NOS3,VEGFA,CYBA
1747	CID000001983	acetaminophen	Stitch	0.0002308	1	0.002215	0.02282	5	270	EPHX2,GSTP1,TNF,NOS3,IL6
1748	CID000001323	DiC8	Stitch	0.0002336	1	0.00224	0.02308	4	146	NAA15,F2,NOS3,IL6
1749	ctd:C017180	decamethrin	CTD	0.0002336	1	0.00224	0.02308	4	146	GSTP1,TNF,NOS3,BDNF
1750	CID000005546	triamterene	Stitch	0.0002349	1	0.002245	0.02313	3	58	HLA-A,HLA-B,ACE
1751	CID005288543	AC1NRBNZ	Stitch	0.0002349	1	0.002245	0.02313	3	58	SEMA3A,LRP5,VEGFA
1752	ctd:C008548	morin	CTD	0.0002349	1	0.002245	0.02313	3	58	TNF,IL6,VEGFA
1753	CID000454710	Lps2	Stitch	0.0002349	1	0.002245	0.02313	3	58	CCL5,TNF,IL6
1754	CID000008830	DNBS	Stitch	0.0002349	1	0.002245	0.02313	3	58	IGF1R,TNF,IL6
1755	CID000001918	AC1L1CIR	Stitch	0.0002349	1	0.002245	0.02313	3	58	F5,NOS3,CYBA
1756	CID000004819	pilocarpine-	Stitch	0.0002398	1	0.002286	0.02355	4	147	CASP8,IL6,PRL,BDNF
1757	ctd:D014752	Vinyl Chloride	CTD	0.0002398	1	0.002286	0.02355	4	147	GSTP1,IHH,IL6,VEGFA
1758	CID000060877	emtricitabine	Stitch	0.0002398	1	0.002286	0.02355	4	147	ARG2,EPO,IGF1,VEGFA
1759	ctd:D013974	Thyroxine	CTD	0.0002398	1	0.002286	0.02355	4	147	IGF1,IGF1R,TNF,ACE
1760	CID000019001	dithiotreitol	Stitch	0.0002444	1	0.002329	0.024	6	430	ARG2,IGF1,IGF1R,HLA-A,PRL,VEGFA
1761	ctd:D000661	Amphetamine	CTD	0.0002461	1	0.002342	0.02413	4	148	TNF,F2,IL6,BDNF
1762	CID000005076	ABT-538	Stitch	0.0002461	1	0.002342	0.02413	4	148	HLA-B,CCL5,TNF,IL6
1763	CID000001433	1400 W	Stitch	0.0002472	1	0.002343	0.02414	3	59	C5,NOS3,CYBA
1764	CID004488322	AC1NB6SH	Stitch	0.0002472	1	0.002343	0.02414	3	59	EPO,IL6,PRL
1765	CID000133005	CEP-1347	Stitch	0.0002472	1	0.002343	0.02414	3	59	CCL5,TNF,BDNF
1766	ctd:C008922	piperine	CTD	0.0002472	1	0.002343	0.02414	3	59	IGF1R,TNF,IL6
1767	CID000006535	triethyl phosphate	Stitch	0.0002472	1	0.002343	0.02414	3	59	NAMPT,TNF,IL6
1768	ctd:C066229	prolinedithiocarbamate	CTD	0.0002472	1	0.002343	0.02414	3	59	TNF,IL6,VEGFA
1769	CID000005663	vesnarinone	Stitch	0.0002472	1	0.002343	0.02414	3	59	TNF,ACE,IL6
1770	ctd:D005395	Fish Oils	CTD	0.0002525	1	0.002392	0.02465	4	149	EPHX2,TNF,NOS3,IL6
1771	ctd:D014580	Ursodeoxycholic Acid	CTD	0.0002554	1	0.002418	0.02492	5	276	CASP8,CCL5,TNF,ATF4,IL6
1772	CID000004946	propranolol	Stitch	0.0002569	1	0.002431	0.02505	6	434	HLA-DRB1,KDR,TNF,NOS3,IL6,PRL
1773	CID000005244	dehydroepiandrosterone sulfate	Stitch	0.0002597	1	0.00245	0.02525	5	277	IGF1,TNF,IL6,PRL,LGALS1
1774	ctd:D004318	Doxycycline	CTD	0.0002598	1	0.00245	0.02525	3	60	GSTP1,HLA-B,TNF
1775	ctd:D019817	Benzoic Acid	CTD	0.0002598	1	0.00245	0.02525	3	60	NOS3,IL6,VEGFA
1776	CID006438325	AC1O5PH2	Stitch	0.0002598	1	0.00245	0.02525	3	60	GSTP1,CASP8,TNF
1777	CID000060184	Coversyl	Stitch	0.0002598	1	0.00245	0.02525	3	60	ACE,NOS3,VEGFA
1778	ctd:C060229	1-(6-((3-methoxyestra-1,3,5(10)-trien-17-yl)amino)hexyl)-1H-pyrrole-2,5-dione	CTD	0.0002598	1	0.00245	0.02525	3	60	TNF,F2,IL6
1779	CID000004425	EN-1530	Stitch	0.0002641	1	0.002489	0.02565	5	278	ARG2,HLA-A,TNF,NOS3,PRL
1780	CID000003310	E-PEG	Stitch	0.0002647	1	0.002494	0.02569	7	621	GSTP1,EPO,HIF1A,CASP8,TNF,IL6,PRL
1781	CID000003397	flutamide	Stitch	0.0002657	1	0.0025	0.02576	4	151	FLT1,IGF1,HLA-B,PRL
1782	ctd:C075773	4-phenylbutyric acid	CTD	0.0002657	1	0.0025	0.02576	4	151	TNF,ATF4,IL6,VEGFA
1783	CID000000753	glycerol	Stitch	0.0002665	1	0.002503	0.02579	8	829	ARG2,GSTP1,HLA-B,LRP5,C3,ACE,NOS3,PRL
1784	ctd:D014638	Vanadates	CTD	0.0002684	1	0.002503	0.02579	10	1302	SEMA3A,FLT1,HIF1A,CASP8,C5,IL6,PRL,EPAS1,VEGFA,CYBA
1785	CID000003763	isoflurane	Stitch	0.0002685	1	0.002503	0.02579	5	279	HIF1A,TNF,NOS3,IL6,VEGFA
1786	CID005289285	Reidispongiolide C	Stitch	0.0002685	1	0.002503	0.02579	5	279	SEMA3A,EPO,CASP8,SUCNR1,BDNF
1787	CID000065961	raxofelast	Stitch	0.0002717	1	0.002503	0.02579	2	12	TNF,VEGFA
1788	ctd:D015120	6-Aminonicotinamide	CTD	0.0002717	1	0.002503	0.02579	2	12	TNF,IL6
1789	ctd:C015423	peoniflorin	CTD	0.0002717	1	0.002503	0.02579	2	12	HIF1A,TNF
1790	ctd:C088327	JM 3100	CTD	0.0002717	1	0.002503	0.02579	2	12	NOS3,VEGFA
1791	CID006439266	CB 966	Stitch	0.0002717	1	0.002503	0.02579	2	12	IGF1,IL6
1792	ctd:C052658	oleanolic acid 3-acetate	CTD	0.0002717	1	0.002503	0.02579	2	12	TNF,IL6
1793	CID000012192	AC1L1Z1X	Stitch	0.0002717	1	0.002503	0.02579	2	12	TNF,IL6
1794	ctd:C110310	quercetin 4'-O-glucopyranoside	CTD	0.0002717	1	0.002503	0.02579	2	12	KDR,VEGFA
1795	DB00055	Drotrecogin alfa	Drug Bank	0.0002717	1	0.002503	0.02579	2	12	F2,F5
1796	ctd:C075391	fraxinellone	CTD	0.0002717	1	0.002503	0.02579	2	12	TNF,IL6
1797	CID000159737	strontium phosphate	Stitch	0.0002717	1	0.002503	0.02579	2	12	HLA-B,LRP5
1798	ctd:C040937	nonivamide	CTD	0.0002717	1	0.002503	0.02579	2	12	IGF1,IL6
1799	CID000100020	thaliporphine	Stitch	0.0002717	1	0.002503	0.02579	2	12	TNF,NOS3
1800	ctd:C487056	N-Acetylcysteinamide	CTD	0.0002717	1	0.002503	0.02579	2	12	HIF1A,VEGFA
1801	CID000149138	danshenxinkun A	Stitch	0.0002717	1	0.002503	0.02579	2	12	IGF1,EPAS1
1802	ctd:C502994	saxagliptin	CTD	0.0002717	1	0.002503	0.02579	2	12	TNF,BDNF
1803	ctd:C403754	benzyloxycarbonyl-leucyl-glutamyl-histidyl-aspartic acid fluoromethyl ketone	CTD	0.0002717	1	0.002503	0.02579	2	12	CASP8,TNF
1804	ctd:C028268	satratoxin G	CTD	0.0002717	1	0.002503	0.02579	2	12	TNF,IL6
1805	ctd:C000603962	1-(3,4-dihydroxyphenyl)-3-(2-methoxyphenyl)prop-2-en-1-one	CTD	0.0002717	1	0.002503	0.02579	2	12	TNF,IL6
1806	ctd:C003060	pentachlorobenzene	CTD	0.0002717	1	0.002503	0.02579	2	12	GSTP1,IL6
1807	ctd:C502239	2-amino-1-methyl-6-phenolimidazo(4,5-b)pyridine-DNA adduct	CTD	0.0002717	1	0.002503	0.02579	2	12	GSTP1,PRL
1808	CID000357073	NSC-614848	Stitch	0.0002717	1	0.002503	0.02579	2	12	HLA-B,CCL5
1809	ctd:D012844	Sincalide	CTD	0.0002717	1	0.002503	0.02579	2	12	TNF,IL6
1810	ctd:C516667	pazopanib	CTD	0.0002717	1	0.002503	0.02579	2	12	FLT1,KDR
1811	ctd:D047309	Flavones	CTD	0.0002717	1	0.002503	0.02579	2	12	CASP8,TNF
1812	ctd:C045504	tropisetron	CTD	0.0002717	1	0.002503	0.02579	2	12	TNF,IL6
1813	CID000129959	AC1L2WIZ	Stitch	0.0002717	1	0.002503	0.02579	2	12	TNF,IL6
1814	ctd:C092152	N-((2-(hydroxyaminocarbonyl)methyl)-4-methylpentanoyl)-3-(2'-naphthyl)alanylalanine, 2-aminoethylamide	CTD	0.0002717	1	0.002503	0.02579	2	12	TNF,IL6
1815	CID000073611	solamargine	Stitch	0.0002717	1	0.002503	0.02579	2	12	CASP8,LGALS1
1816	ctd:C038849	roridin A	CTD	0.0002717	1	0.002503	0.02579	2	12	TNF,IL6
1817	CID000073396	E 73	Stitch	0.0002717	1	0.002503	0.02579	2	12	CASP8,TNF
1818	ctd:C471998	JTE 013	CTD	0.0002717	1	0.002503	0.02579	2	12	TNF,IL6
1819	ctd:C577554	MC1568	CTD	0.0002717	1	0.002503	0.02579	2	12	TNF,IL6
1820	ctd:D009665	Noscapine	CTD	0.0002717	1	0.002503	0.02579	2	12	HIF1A,VEGFA
1821	CID005288446	AC1NRBJE	Stitch	0.0002725	1	0.002505	0.02582	4	152	IGF1R,CASP8,TNF,VEGFA
1822	CID000003858	benzylsuccinic acid	Stitch	0.0002728	1	0.002505	0.02582	3	61	IGF1,ACE,VEGFA
1823	CID000091469	equol	Stitch	0.0002728	1	0.002505	0.02582	3	61	TNF,NOS3,PRL
1824	CID000656900	4-iodobenzenethiol	Stitch	0.0002728	1	0.002505	0.02582	3	61	ACE,NOS3,LGALS1
1825	ctd:C105351	1-hydroxy-2-oxo-3,3-bis(2-aminoethyl)-1-triazene	CTD	0.0002728	1	0.002505	0.02582	3	61	HIF1A,KDR,MIR223
1826	ctd:C022777	bufalin	CTD	0.0002728	1	0.002505	0.02582	3	61	GSTP1,TNF,VEGFA
1827	CID000000597	cytosine	Stitch	0.0002799	1	0.002569	0.02647	6	441	GSTP1,IGF1,HLA-A,MTHFR,C3,PRL
1828	CID000164531	H-8105	Stitch	0.000282	1	0.002587	0.02666	5	282	IGF1,NOS3,IL6,PRL,BDNF
1829	ctd:D014415	Tunicamycin	CTD	0.0002855	1	0.002617	0.02697	11	1574	ARG2,FLT1,HIF1A,IGF1,IGF1R,KDR,TNF,ATF4,IL6,EPAS1,VEGFA
1830	ctd:D005680	gamma-Aminobutyric Acid	CTD	0.0002863	1	0.002622	0.02702	3	62	TNF,IL6,BDNF
1831	ctd:C002963	geranylgeranyl pyrophosphate	CTD	0.0002863	1	0.002622	0.02702	3	62	TNF,IL6,VEGFA
1832	ctd:D001556	Lindane	CTD	0.0002867	1	0.002624	0.02704	6	443	IGF1,TNF,F2,F5,BDNF,VEGFA
1833	CID000002958	daunorubicin semiquinone	Stitch	0.0002961	1	0.002709	0.02791	5	285	GSTP1,CASP8,TNF,NOS3,PRL
1834	CID000000838	L-adrenaline	Stitch	0.0002973	1	0.002718	0.028	6	446	TNF,F2,ACE,NOS3,IL6,PRL
1835	ctd:C425931	GW 501516	CTD	0.0003002	1	0.002737	0.0282	3	63	TNF,NOS3,IL6
1836	CID000003267	beta-estradiol-17-valerate	Stitch	0.0003002	1	0.002737	0.0282	3	63	IGF1,SCG3,PRL
1837	CID000040024	deoxynivalenol	Stitch	0.0003002	1	0.002737	0.0282	3	63	C3,TNF,IL6
1838	ctd:D011224	Prazosin	CTD	0.0003002	1	0.002737	0.0282	3	63	IGF1,CASP8,CCL5
1839	CID006338583	AC1O3UYX	Stitch	0.0003002	1	0.002737	0.0282	3	63	HLA-A,C3,C5
1840	ctd:D004726	Endosulfan	CTD	0.0003009	1	0.002741	0.02824	6	447	C3,CCL5,TNF,NOS3,IL6,PRL
1841	ctd:C496492	abrine	CTD	0.0003009	1	0.002741	0.02824	5	286	ANGPT1,APLN,CASP8,C3,CCL5
1842	CID000123880	BAEE	Stitch	0.0003145	1	0.002855	0.02942	3	64	F2,F5,NOS3
1843	ctd:D026423	S-Nitroso-N-Acetylpenicillamine	CTD	0.0003145	1	0.002855	0.02942	3	64	CASP8,TNF,VEGFA
1844	CID006456015	sunitinib malate	Stitch	0.0003145	1	0.002855	0.02942	3	64	FLT1,KDR,VEGFA
1845	ctd:D001786	Blood Glucose	CTD	0.0003145	1	0.002855	0.02942	3	64	CASP8,TNF,IL6
1846	ctd:C036643	isoeugenol	CTD	0.0003145	1	0.002855	0.02942	3	64	HIF1A,TNF,IL6
1847	CID000119593	pentosidine	Stitch	0.0003145	1	0.002855	0.02942	3	64	HLA-A,IL6,VEGFA
1848	CID000003367	2-fluoroadenine arabinoside	Stitch	0.0003157	1	0.002857	0.02944	4	158	HIF1A,CASP8,VEGFA,CYBA
1849	CID000078017	I-As	Stitch	0.0003157	1	0.002857	0.02944	4	158	CASP8,F2,NOS3,IL6
1850	ctd:C003297	nandrolone decanoate	CTD	0.0003207	1	0.002857	0.02944	2	13	TNF,ACE
1851	ctd:C027309	3,4,5,3',4',5'-hexachlorobiphenyl	CTD	0.0003207	1	0.002857	0.02944	2	13	HIF1A,KDR
1852	ctd:D015064	16,16-Dimethylprostaglandin E2	CTD	0.0003207	1	0.002857	0.02944	2	13	TNF,NOS3
1853	CID003080927	pentamannose phosphate	Stitch	0.0003207	1	0.002857	0.02944	2	13	IGF1,HLA-A
1854	ctd:C423449	CpG ODN 1826	CTD	0.0003207	1	0.002857	0.02944	2	13	TNF,IL6
1855	ctd:D044948	Flavonols	CTD	0.0003207	1	0.002857	0.02944	2	13	CASP8,TNF
1856	CID000423574	4-amino-5-oxohexanoic acid	Stitch	0.0003207	1	0.002857	0.02944	2	13	EPO,IL6
1857	ctd:C412811	maslinic acid	CTD	0.0003207	1	0.002857	0.02944	2	13	IGF1R,VEGFA
1858	ctd:C411572	H 1356	CTD	0.0003207	1	0.002857	0.02944	2	13	IGF1,IGF1R
1859	ctd:C411188	obacunone glucoside	CTD	0.0003207	1	0.002857	0.02944	2	13	CASP8,IL6
1860	CID000146472	diethylthiocarbamate	Stitch	0.0003207	1	0.002857	0.02944	2	13	NOS3,CYBA
1861	ctd:C025314	ferric citrate	CTD	0.0003207	1	0.002857	0.02944	2	13	HIF1A,F2
1862	ctd:C007734	flunisolide	CTD	0.0003207	1	0.002857	0.02944	2	13	CCL5,TNF
1863	CID000318505	NSC 255110	Stitch	0.0003207	1	0.002857	0.02944	2	13	HIF1A,VEGFA
1864	CID000006641	dicumyl peroxide	Stitch	0.0003207	1	0.002857	0.02944	2	13	GSTP1,ACE
1865	ctd:C005413	palmatine	CTD	0.0003207	1	0.002857	0.02944	2	13	CCL5,VEGFA
1866	ctd:D053778	Thiazolidines	CTD	0.0003207	1	0.002857	0.02944	2	13	TNF,IL6
1867	ctd:C561627	dabrafenib	CTD	0.0003207	1	0.002857	0.02944	2	13	TNF,IL6
1868	ctd:C477898	3-(4-(4-((1-(2-chlorophenyl)ethoxy)carbonyl amino)-3-methyl-5-isoxazolyl) benzylsulfanyl) propanoic acid	CTD	0.0003207	1	0.002857	0.02944	2	13	EPO,IL6
1869	ctd:C041398	7,7'-dimethoxy-(4,4'-bi-1,3-benzodioxole)-5,5'-dicarboxylic acid dimethyl ester	CTD	0.0003207	1	0.002857	0.02944	2	13	CASP8,TNF
1870	ctd:C021183	1,7-dimethylxanthine	CTD	0.0003207	1	0.002857	0.02944	2	13	TNF,IL6
1871	ctd:D011509	Proteoglycans	CTD	0.0003207	1	0.002857	0.02944	2	13	IGF1,IL6
1872	ctd:C072956	4-nitrososulfamethoxazole	CTD	0.0003207	1	0.002857	0.02944	2	13	TNF,IL6
1873	CID000189691	C2-O	Stitch	0.0003207	1	0.002857	0.02944	2	13	HLA-A,HLA-B
1874	ctd:D001664	Biliverdine	CTD	0.0003207	1	0.002857	0.02944	2	13	TNF,IL6
1875	ctd:C020365	17-alpha-hydroxy-progesterone caproate	CTD	0.0003207	1	0.002857	0.02944	2	13	TNF,IL6
1876	ctd:D007665	Ketotifen	CTD	0.0003207	1	0.002857	0.02944	2	13	TNF,IL6
1877	ctd:C036116	desethylamiodarone	CTD	0.0003207	1	0.002857	0.02944	2	13	TNF,NOS3
1878	ctd:D018350	alpha-Amino-3-hydroxy-5-methyl-4-isoxazolepropionic Acid	CTD	0.0003207	1	0.002857	0.02944	2	13	TNF,BDNF
1879	CID000001675	N3-methylthymidine	Stitch	0.0003207	1	0.002857	0.02944	2	13	FLT1,IGF1
1880	ctd:C096277	tetrahydrocurcumin	CTD	0.0003207	1	0.002857	0.02944	2	13	TNF,NOS3
1881	ctd:C025906	stilbene oxide	CTD	0.0003207	1	0.002857	0.02944	2	13	EPHX2,GSTP1
1882	ctd:D009566	Nitrates	CTD	0.0003207	1	0.002857	0.02944	2	13	TNF,NOS3
1883	ctd:D012643	Selenium	CTD	0.0003218	1	0.002866	0.02953	11	1596	ARG2,EPHX2,GSTP1,FLT1,ANGPT1,HLA-B,CASP8,TNF,ATF4,IL6,VEGFA
1884	ctd:C105260	4-tert-octylphenol	CTD	0.0003234	1	0.002878	0.02965	4	159	IGF1,C3,ATF4,VEGFA
1885	ctd:C496932	panobinostat	CTD	0.0003241	1	0.002883	0.0297	10	1333	FLT1,ANGPT1,ANGPT2,SCG3,CASP8,C3,KDR,NDP,EPAS1,LGALS1
1886	CID000032744	polyinosinic-polycytidylic acid	Stitch	0.0003259	1	0.002895	0.02984	5	291	FLT1,CCL5,TNF,IL6,LGALS1
1887	ctd:D005038	Ethylnitrosourea	CTD	0.0003259	1	0.002895	0.02984	5	291	IGF1R,LRP5,KDR,TNF,BDNF
1888	CID004635324	AC1NE222	Stitch	0.0003292	1	0.002922	0.03011	3	65	FLT1,KDR,VEGFA
1889	CID010147858	MnTBAP	Stitch	0.0003292	1	0.002922	0.03011	3	65	CASP8,NOS3,CYBA
1890	CID000002156	amiodarone	Stitch	0.0003312	1	0.002938	0.03027	4	160	TNF,ACE,NOS3,IL6
1891	CID000002585	carvedilol	Stitch	0.0003391	1	0.003003	0.03095	4	161	TNF,ACE,NOS3,CYBA
1892	ctd:D011239	Prednisolone	CTD	0.0003391	1	0.003003	0.03095	4	161	IGF1,TNF,IL6,VEGFA
1893	ctd:D020148	Butyric Acid	CTD	0.0003391	1	0.003003	0.03095	4	161	NAA15,TNF,IL6,VEGFA
1894	CID000002505	C2-ceramide	Stitch	0.0003415	1	0.003024	0.03116	5	294	IGF1,CASP8,TNF,IL6,BDNF
1895	ctd:D003022	Clotrimazole	CTD	0.0003444	1	0.003041	0.03134	3	66	GSTP1,CASP8,VEGFA
1896	CID006331868	AC1O3LUB	Stitch	0.0003444	1	0.003041	0.03134	3	66	TNF,IL6,CYBA
1897	CID000064944	dichlorofluorescein	Stitch	0.0003444	1	0.003041	0.03134	3	66	CASP8,TNF,CYBA
1898	CID000004048	AC1Q6OH3	Stitch	0.0003444	1	0.003041	0.03134	3	66	VASH1,IL6,PRL
1899	CID000156422	BIRB796	Stitch	0.0003444	1	0.003041	0.03134	3	66	KDR,TNF,IL6
1900	CID005288571	AC1NRBPT	Stitch	0.0003471	1	0.003059	0.03152	4	162	IGF1,MTHFR,TNF,IL6
1901	CID000004609	oxaliplatin	Stitch	0.0003471	1	0.003059	0.03152	4	162	GSTP1,FLT1,CASP8,VEGFA
1902	CID000003108	dipyridamole	Stitch	0.0003471	1	0.003059	0.03152	4	162	ACE,F5,IL6,BDNF
1903	ctd:D008752	Methylene Chloride	CTD	0.0003471	1	0.003059	0.03152	4	162	NAMPT,CCL5,TNF,IL6
1904	CID000000200	AICAR monophosphate	Stitch	0.0003553	1	0.003128	0.03223	4	163	NAA15,IL6,BDNF,VEGFA
1905	ctd:D024502	alpha-Tocopherol	CTD	0.0003553	1	0.003128	0.03223	4	163	CASP8,TNF,NOS3,IL6
1906	CID000003690	ifosfamide	Stitch	0.00036	1	0.003156	0.03252	3	67	GSTP1,EPO,IL6
1907	CID000001133	thioglycolate	Stitch	0.00036	1	0.003156	0.03252	3	67	EPHX2,TNF,IL6
1908	CID000122079	F(420	Stitch	0.00036	1	0.003156	0.03252	3	67	EPO,TNF,IL6
1909	ctd:D053119	Benzophenanthridines	CTD	0.00036	1	0.003156	0.03252	3	67	GSTP1,CASP8,F2
1910	CID000025419	clodronate	Stitch	0.00036	1	0.003156	0.03252	3	67	FLT1,TNF,IL6
1911	ctd:C010423	pyrithione zinc	CTD	0.00036	1	0.003156	0.03252	3	67	EPHX2,CASP8,TNF
1912	ctd:D048789	Phytoestrogens	CTD	0.00036	1	0.003156	0.03252	3	67	CCL5,TNF,IL6
1913	CID000008172	triethylene glycol	Stitch	0.00036	1	0.003156	0.03252	3	67	EPO,F2,F5
1914	CID000004376	N-methyl-DL-aspartic acid	Stitch	0.0003653	1	0.003196	0.03294	7	655	EPO,NAA15,CASP8,TNF,NOS3,PRL,BDNF
1915	CID000000174	polyethylene glycol	Stitch	0.000369	1	0.003196	0.03294	5	299	EPHX2,C3,F5,NOS3,EPAS1
1916	CID000002548	AC1L1DXE	Stitch	0.000369	1	0.003196	0.03294	5	299	TNF,NOS3,IL6,BDNF,VEGFA
1917	ctd:D015250	Aclarubicin	CTD	0.0003736	1	0.003196	0.03294	2	14	GSTP1,CASP8
1918	ctd:C545423	resolvin D2	CTD	0.0003736	1	0.003196	0.03294	2	14	TNF,IL6
1919	ctd:C557505	3',4'-dimethoxy-alpha-naphthoflavone	CTD	0.0003736	1	0.003196	0.03294	2	14	C3,IL6
1920	CID000014437	corticosterone acetate	Stitch	0.0003736	1	0.003196	0.03294	2	14	ACE,IL6
1921	ctd:D004394	Dydrogesterone	CTD	0.0003736	1	0.003196	0.03294	2	14	TNF,IL6
1922	CID000557593	glycyl-L-histidyl-L-lysine acetate	Stitch	0.0003736	1	0.003196	0.03294	2	14	IGF1,IL6
1923	ctd:C065857	beclomethasone 17-monopropionate	CTD	0.0003736	1	0.003196	0.03294	2	14	TNF,IL6
1924	ctd:C063159	1-(2-(3-(4-methoxyphenyl)propoxy)-4-methoxyphenylethyl)-1H-imidazole	CTD	0.0003736	1	0.003196	0.03294	2	14	NOS3,BDNF
1925	ctd:C002373	monobutyryl cyclic AMP	CTD	0.0003736	1	0.003196	0.03294	2	14	HIF1A,VEGFA
1926	ctd:D017328	Fosinopril	CTD	0.0003736	1	0.003196	0.03294	2	14	ACE,NOS3
1927	ctd:C015952	4-iodo-2,5-dimethoxyphenylisopropylamine	CTD	0.0003736	1	0.003196	0.03294	2	14	CASP8,BDNF
1928	ctd:C033901	3'-O-(4-benzoyl)benzoyladenosine 5'-triphosphate	CTD	0.0003736	1	0.003196	0.03294	2	14	TNF,IL6
1929	ctd:C067207	obacunone	CTD	0.0003736	1	0.003196	0.03294	2	14	CASP8,IL6
1930	ctd:C018562	guggulu extract	CTD	0.0003736	1	0.003196	0.03294	2	14	TNF,IL6
1931	CID015991547	3-th	Stitch	0.0003736	1	0.003196	0.03294	2	14	FLT1,ANGPT1
1932	CID000068741	epristeride	Stitch	0.0003736	1	0.003196	0.03294	2	14	IGF1,IGF1R
1933	ctd:C054125	sesamin	CTD	0.0003736	1	0.003196	0.03294	2	14	TNF,IL6
1934	ctd:C017558	nickel sulfide	CTD	0.0003736	1	0.003196	0.03294	2	14	HIF1A,TNF
1935	ctd:D015575	Roxithromycin	CTD	0.0003736	1	0.003196	0.03294	2	14	TNF,IL6
1936	ctd:C031938	calmidazolium	CTD	0.0003736	1	0.003196	0.03294	2	14	F2,NOS3
1937	CID000148203	D 2163	Stitch	0.0003736	1	0.003196	0.03294	2	14	FLT1,KDR
1938	ctd:C029743	alpha-ketoglutaric acid	CTD	0.0003736	1	0.003196	0.03294	2	14	HIF1A,VEGFA
1939	ctd:D017963	Azithromycin	CTD	0.0003736	1	0.003196	0.03294	2	14	TNF,IL6
1940	ctd:C024986	barium chloride	CTD	0.0003736	1	0.003196	0.03294	2	14	TNF,IL6
1941	ctd:C046498	tricyclodecane-9-yl-xanthogenate	CTD	0.0003736	1	0.003196	0.03294	2	14	CASP8,TNF
1942	ctd:C070295	catalase-polyethylene glycol	CTD	0.0003736	1	0.003196	0.03294	2	14	ACE,NOS3
1943	ctd:C010561	crocetin	CTD	0.0003736	1	0.003196	0.03294	2	14	TNF,IL6
1944	ctd:C034534	3,7,11,15-tetramethyl-2,4,6,10,14-hexadecapentaenoic acid	CTD	0.0003736	1	0.003196	0.03294	2	14	TNF,IL6
1945	CID000177840	DPTA-nonoate	Stitch	0.0003736	1	0.003196	0.03294	2	14	CASP8,NOS3
1946	ctd:D061466	Lopinavir	CTD	0.0003736	1	0.003196	0.03294	2	14	TNF,IL6
1947	ctd:D011122	Polyphosphates	CTD	0.0003736	1	0.003196	0.03294	2	14	TNF,IL6
1948	CID000151118	CPI-1189	Stitch	0.0003736	1	0.003196	0.03294	2	14	EPO,TNF
1949	ctd:D000068882	Paliperidone Palmitate	CTD	0.0003736	1	0.003196	0.03294	2	14	PRL,BDNF
1950	ctd:C081331	24-norursodeoxycholic acid	CTD	0.0003736	1	0.003196	0.03294	2	14	CCL5,TNF
1951	ctd:C082735	azetidine	CTD	0.0003736	1	0.003196	0.03294	2	14	TNF,IL6
1952	ctd:D006025	Glycosaminoglycans	CTD	0.0003736	1	0.003196	0.03294	2	14	TNF,IHH
1953	CID000071354	bindarit	Stitch	0.0003736	1	0.003196	0.03294	2	14	CCL5,IL6
1954	ctd:C012594	triphenyltin chloride	CTD	0.0003736	1	0.003196	0.03294	2	14	TNF,IL6
1955	ctd:D020160	Sodium Benzoate	CTD	0.0003736	1	0.003196	0.03294	2	14	TNF,IL6
1956	CID000021013	tetrachlorophenol	Stitch	0.0003736	1	0.003196	0.03294	2	14	C3,C5
1957	ctd:C444426	splitomicin	CTD	0.0003736	1	0.003196	0.03294	2	14	TNF,F2
1958	ctd:C024714	caryophyllene	CTD	0.0003736	1	0.003196	0.03294	2	14	TNF,IL6
1959	ctd:D011810	Quinoxalines	CTD	0.0003736	1	0.003196	0.03294	2	14	HIF1A,TNF
1960	ctd:D058425	Vaccines, Virus-Like Particle	CTD	0.0003736	1	0.003196	0.03294	2	14	TNF,IL6
1961	ctd:C031180	chrysene	CTD	0.0003743	1	0.0032	0.03298	8	872	VASH1,CCL5,TNF,ATF4,C5,F5,IL6,LGALS1
1962	ctd:C103303	alitretinoin	CTD	0.0003746	1	0.003202	0.03299	5	300	IGF1,CASP8,TNF,IL6,VEGFA
1963	ctd:C004312	glycidol	CTD	0.0003755	1	0.003206	0.03304	6	466	ARG2,C3,KDR,TNF,IHH,BDNF
1964	ctd:D016578	Crack Cocaine	CTD	0.0003761	1	0.003206	0.03304	3	68	HIF1A,ACE,IL6
1965	CID006398604	Ru-pyridocarbazole-2	Stitch	0.0003761	1	0.003206	0.03304	3	68	HLA-A,HLA-B,HLA-DRB1
1966	ctd:D009183	Mycotoxins	CTD	0.0003761	1	0.003206	0.03304	3	68	C3,TNF,IL6
1967	ctd:C073339	usnic acid	CTD	0.0003761	1	0.003206	0.03304	3	68	TNF,ATF4,IL6
1968	ctd:D014859	Warfarin	CTD	0.0003808	1	0.003242	0.03341	4	166	TNF,F2,F5,IL6
1969	ctd:D019345	Zinc Acetate	CTD	0.0003808	1	0.003242	0.03341	4	166	HIF1A,TNF,IL6,VEGFA
1970	CID000014888	arsenic trioxide	Stitch	0.0003842	1	0.00327	0.03369	6	468	GSTP1,HIF1A,CASP8,IL6,VEGFA,CYBA
1971	CID000001639	aminotriazole	Stitch	0.0003895	1	0.003314	0.03415	4	167	GSTP1,TNF,NOS3,IL6
1972	ctd:D003703	Demecolcine	CTD	0.0003918	1	0.003332	0.03433	8	878	FLT1,NAMPT,CCL5,TNF,TEAD4,F5,IL6,VEGFA
1973	CID000002856	OL-P	Stitch	0.0003926	1	0.003333	0.03435	3	69	CCL5,TNF,IL6
1974	CID000084102	To 2	Stitch	0.0003926	1	0.003333	0.03435	3	69	HLA-B,CASP8,NOS3
1975	CID000130300	paramethoxyphenyl-acetyl dehydroalanine	Stitch	0.0003926	1	0.003333	0.03435	3	69	MTHFR,ACE,VEGFA
1976	CID000004740	pentoxifylline	Stitch	0.000398	1	0.003372	0.03475	5	304	IGF1,TNF,NOS3,IL6,CYBA
1977	CID000001567	2-mercaptoethanol	Stitch	0.000398	1	0.003372	0.03475	5	304	ARG2,HIF1A,HLA-A,ATF4,LGALS1
1978	ctd:D003634	DDT	CTD	0.000398	1	0.003372	0.03475	5	304	IGF1,MALAT1,TNF,BDNF,VEGFA
1979	CID000005103	AC1L1JM9	Stitch	0.000398	1	0.003372	0.03475	5	304	CASP8,KDR,TNF,F2,IL6
1980	4671_UP	Clenbuterol hydrochloride [21898-19-1]; Up 200; 12.8uM; PC3; HT_HG-U133A	Broad Institute CMAP Up	0.0003984	1	0.003374	0.03477	4	168	IGF1R,C3,C5,EPAS1
1981	CID000449615	AC1L9NBB	Stitch	0.0004075	1	0.003445	0.0355	4	169	EPO,FLT1,TNF,BDNF
1982	4471_UP	Astemizole [68844-77-9]; Up 200; 8.8uM; PC3; HT_HG-U133A	Broad Institute CMAP Up	0.0004075	1	0.003445	0.0355	4	169	ARG2,ATF4,IL6,EPAS1
1983	CID000005641	urethane	Stitch	0.0004075	1	0.003445	0.0355	4	169	ARG2,TNF,NOS3,PRL
1984	ctd:C013099	mancozeb	CTD	0.0004096	1	0.003455	0.0356	3	70	CASP8,KDR,TNF
1985	CID000185915	L-3-(2-naphthyl)alanine	Stitch	0.0004096	1	0.003455	0.0356	3	70	TNF,IL6,PRL
1986	CID000198577	Diacetam 5	Stitch	0.0004096	1	0.003455	0.0356	3	70	IGF1,IHH,PRL
1987	CID009547936	Eop	Stitch	0.0004096	1	0.003455	0.0356	3	70	TNF,IL6,PRL
1988	ctd:D020001	1-Butanol	CTD	0.0004096	1	0.003455	0.0356	3	70	C5,PRL,VEGFA
1989	ctd:C004656	chloroacetaldehyde	CTD	0.0004163	1	0.003509	0.03616	5	307	TSPAN12,HIF1A,NAMPT,CASP8,ATF4
1990	CID000002346	benzyl isothiocyanate	Stitch	0.0004271	1	0.003567	0.03675	3	71	GSTP1,CASP8,CYBA
1991	ctd:C077990	alvocidib	CTD	0.0004271	1	0.003567	0.03675	3	71	CASP8,TNF,VEGFA
1992	CID000447401	1nmk	Stitch	0.0004271	1	0.003567	0.03675	3	71	IGF1,F2,PRL
1993	CID000003350	H045	Stitch	0.0004271	1	0.003567	0.03675	3	71	IGF1,ANGPT1,NOS3
1994	CID005492221	AC1NUSZN	Stitch	0.0004271	1	0.003567	0.03675	3	71	C3,F2,LGALS1
1995	CID000451715	Coumpound 514	Stitch	0.0004271	1	0.003567	0.03675	3	71	C3,TNF,IL6
1996	ctd:C024352	fludarabine	CTD	0.0004271	1	0.003567	0.03675	3	71	HIF1A,CASP8,VEGFA
1997	ctd:C049864	ginsenoside Re	CTD	0.0004271	1	0.003567	0.03675	3	71	TNF,NOS3,IL6
1998	ctd:D008274	Magnesium	CTD	0.0004271	1	0.003567	0.03675	3	71	C3,TNF,PRL
1999	CID000047528	nicorandil	Stitch	0.0004271	1	0.003567	0.03675	3	71	HLA-A,TNF,NOS3
[truncated: 4,604 more rows]

## Sheet: ALL ROP Genes
Symbol	Org_name	GeneID	Aliases	description	other_designations	map_location	chromosome	genomic_nucleotide_accession.version	start_position_on_the_genomic_accession	end_position_on_the_genomic_accession	orientation	OMIM
VEGFA	Homo sapiens	7422	MVCD1, VEGF, VPF	vascular endothelial growth factor A	vascular endothelial growth factor A|vascular endothelial growth factor A121|vascular endothelial growth factor A165|vascular permeability factor	6p21.1	6	NC_000006.12	43770209	43786487	plus	192240
NOS3	Homo sapiens	4846	ECNOS, eNOS	nitric oxide synthase 3	nitric oxide synthase, endothelial|EC-NOS|NOS type III|NOSIII|cNOS|constitutive NOS|endothelial NOS|nitric oxide synthase 3 (endothelial cell)	7q36.1	7	NC_000007.14	150991017	151014588	plus	163729
IGF1	Homo sapiens	3479	IGF, IGF-I, IGFI, MGF	insulin like growth factor 1	insulin-like growth factor I|insulin-like growth factor 1 (somatomedin C)|insulin-like growth factor IB|mechano growth factor|somatomedin-C	12q23.2	12	NC_000012.12	102395874	102481839	minus	147440
FZD4	Homo sapiens	8322	CD344, EVR1, FEVRS, Fz-4, Fz4, FzE4, GPCR, hFz4, FZD4	frizzled class receptor 4	frizzled-4|WNT receptor frizzled-4|frizzled 4, seven transmembrane spanning receptor|frizzled family receptor 4|frizzled homolog 4	11q14.2	11	NC_000011.10	86945679	86955395	minus	604579
NDP	Homo sapiens	4693	EVR2, FEVR, ND	norrin cystine knot growth factor NDP	norrin|NDP, norrin cystine knot growth factor|Norrie disease (pseudoglioma)|X-linked exudative vitreoretinopathy 2 protein|norrie disease protein	Xp11.3	X	NC_000023.11	43948776	43973390	minus	300658
TNF	Homo sapiens	7124	DIF-alpha, TNFA, TNFSF2, TNLG1F, TNF	tumor necrosis factor	tumor necrosis factor|APC1 protein|TNF, macrophage-derived|TNF, monocyte-derived|TNF-a|tumor necrosis factor ligand 1F|tumor necrosis factor ligand superfamily member 2|tumor necrosis factor-alpha|tumor necrotic factor alpha	6p21.33	6	NC_000006.12	31575565	31578336	plus	191160
Kdr	Rattus norvegicus	25589	Vegfr-2	kinase insert domain receptor	vascular endothelial growth factor receptor 2|FLK-1|FLK1 kinase insert domain receptor (VEGF receptor 2)|FLK1 kinase insert domain receptor (a type III receptor tyrosine kinase) (VEGF receptor 2)|fetal liver kinase 1|kinase insert domain protein receptor|protein-tyrosine kinase receptor flk-1	14p11	14	NC_051349.1	32217871	32261018	plus
IL6	Homo sapiens	3569	BSF-2, BSF2, CDF, HGF, HSF, IFN-beta-2, IFNB2, IL-6	interleukin 6	interleukin-6|B-cell differentiation factor|B-cell stimulatory factor 2|CTL differentiation factor|hybridoma growth factor|interferon beta-2|interleukin BSF-2	7p15.3	7	NC_000007.14	22727200	22731998	plus	147620
ACE	Homo sapiens	1636	ACE1, CD143, DCP, DCP1	angiotensin I converting enzyme	angiotensin-converting enzyme|CD143 antigen|angiotensin I converting enzyme (peptidyl-dipeptidase A) 1|carboxycathepsin|dipeptidyl carboxypeptidase 1|dipeptidyl carboxypeptidase I|kininase II|peptidase P	17q23.3	17	NC_000017.11	63477061	63498373	plus	106180
BDNF	Homo sapiens	627	ANON2, BULN2	brain derived neurotrophic factor	brain-derived neurotrophic factor|abrineurin|neurotrophin	11p14.1	11	NC_000011.10	27654893	27722030	minus	113505
GSTP1	Homo sapiens	2950	DFN7, FAEES3, GST3, GSTP, HEL-S-22, PI	glutathione S-transferase pi 1	glutathione S-transferase P|GST class-pi|GSTP1-1|deafness, X-linked 7|epididymis secretory protein Li 22|fatty acid ethyl ester synthase III	11q13.2	11	NC_000011.10	67583812	67586653	plus	134660
Vegfa	Mus musculus	22339	Vegf, Vpf	vascular endothelial growth factor A	vascular endothelial growth factor A|vascular permeability factor	17 22.79 cM	17	NC_000083.7	46327919	46343303	minus
Vegfa	Rattus norvegicus	83785	VEGF-A, VEGF111, VEGF164, VPF, Vegf	vascular endothelial growth factor A	vascular endothelial growth factor A|vascular permeability factor	9q12	9	NC_051344.1	14955300	14970641	plus
ANGPT2	Homo sapiens	285	AGPT2, ANG2, LMPHM10	angiopoietin 2	angiopoietin-2|Tie2-ligand|angiopoietin-2B|angiopoietin-2a	8p23.1	8	NC_000008.11	6499632	6563245	minus	601922
TSPAN12	Homo sapiens	23554	EVR5, NET-2, NET2, TM4SF12	tetraspanin 12	tetraspanin-12|tetraspan NET-2|transmembrane 4 superfamily member 12|tspan-12	7q31.31	7	NC_000007.14	120787320	120858335	minus	613138
MTHFR	Homo sapiens	4524		methylenetetrahydrofolate reductase	methylenetetrahydrofolate reductase|5,10-methylenetetrahydrofolate reductase (NADPH)|methylenetetrahydrofolate reductase (NAD(P)H)	1p36.22	1	NC_000001.11	11785723	11805964	minus	607093
HLA-DRB1	Homo sapiens	3123	DRB1, HLA-DR1B, HLA-DRB, SS1	major histocompatibility complex, class II, DR beta 1	major histocompatibility complex, class II, DR beta 1 precursor|HLA class II histocompatibility antigen, DR-1 beta chain|MHC class II HLA-DR beta 1 chain|human leucocyte antigen DRB1|lymphocyte antigen DRB1	6p21.32	6	NC_000006.12	32578775	32589848	minus	142857
HLA-B	Homo sapiens	3106	AS, B-4901, HLAB	major histocompatibility complex, class I, B	major histocompatibility complex, class I, B|HLA class I antigen HLA-B|HLA class I histocompatibility antigen, B alpha chain|MHC HLA-B cell surface glycoprotein|MHC HLA-B transmembrane glycoprotein|MHC class 1 antigen|MHC class I antigen HLA-B alpha chain|MHC class I antigen HLA-B heavy chain|MHC class I antigen SHCHA|MHC class I molecule|leukocyte antigen class I-B	6p21.33	6	NC_000006.12	31353875	31357179	minus	142830
F2	Homo sapiens	2147	PT, RPRGL2, THPH1	coagulation factor II, thrombin	prothrombin|prepro-coagulation factor II|prothrombin B-chain|thrombin factor II	11p11.2	11	NC_000011.10	46719213	46739506	plus	176930
HLA-A	Homo sapiens	3105	HLAA	major histocompatibility complex, class I, A	HLA class I histocompatibility antigen, A alpha chain|HLA class I histocompatibility antigen, A-1 alpha chain|MHC class I antigen HLA-A heavy chain|leukocyte antigen class I-A	6p22.1	6	NC_000006.12	29942532	29945870	plus	142800
F5	Homo sapiens	2153	FVL, PCCF, RPRGL1, THPH2	coagulation factor V	coagulation factor V|activated protein c cofactor|coagulation factor V (proaccelerin, labile factor)|coagulation factor V jinjiang A2 domain|factor V Leiden	1q24.2	1	NC_000001.11	169511951	169586481	minus	612309
Hif1a	Mus musculus	15251	HIF-1-alpha, HIF1-alpha, HIF1alpha, MOP1, bHLHe78	hypoxia inducible factor 1, alpha subunit	hypoxia-inducible factor 1-alpha|ARNT-interacting protein	12 31.99 cM	12	NC_000078.7	73948098	73994328	plus
IGF1R	Homo sapiens	3480	CD221, IGFIR, IGFR, JTK13	insulin like growth factor 1 receptor	insulin-like growth factor 1 receptor|IGF-I receptor	15q26.3	15	NC_000015.10	98648539	98964530	plus	147370
FLT1	Homo sapiens	2321	FLT, FLT-1, VEGFR-1, VEGFR1	fms related receptor tyrosine kinase 1	vascular endothelial growth factor receptor 1|fms related tyrosine kinase 1|fms-like tyrosine kinase 1|fms-related tyrosine kinase 1 (vascular endothelial growth factor/vascular permeability factor receptor)|tyrosine-protein kinase FRT|tyrosine-protein kinase receptor FLT|vascular permeability factor receptor	13q12.3	13	NC_000013.11	28300346	28495128	minus	165070
CCL5	Homo sapiens	6352	D17S136E, RANTES, SCYA5, SIS-delta, SISd, TCP228, eoCP	C-C motif chemokine ligand 5	C-C motif chemokine 5|T-cell specific protein p288|beta-chemokine RANTES|chemokine (C-C motif) ligand 5|eosinophil chemotactic cytokine|regulated upon activation, normally T-expressed, and presumably secreted|small inducible cytokine subfamily A (Cys-Cys), member 5	17q12	17	NC_000017.11	35871491	35880360	minus	187011
NAMPT	Homo sapiens	10135	1110035O14Rik, PBEF, PBEF1, VF, VISFATIN	nicotinamide phosphoribosyltransferase	nicotinamide phosphoribosyltransferase|NAmPRTase|pre-B cell-enhancing factor|pre-B-cell colony-enhancing factor 1	7q22.3	7	NC_000007.14	106248298	106285888	minus	608764
EPAS1	Homo sapiens	2034	ECYT4, HIF2A, HLF, MOP2, PASD2, bHLHe73	endothelial PAS domain protein 1	endothelial PAS domain-containing protein 1|EPAS-1|HIF-1-alpha-like factor|HIF-1alpha-like factor|HIF-2-alpha|HIF2-alpha|PAS domain-containing protein 2|basic-helix-loop-helix-PAS protein MOP2|class E basic helix-loop-helix protein 73|hypoxia-inducible factor 2 alpha|member of PAS protein 2	2p21	2	NC_000002.12	46297407	46386697	plus	603349
EPO	Homo sapiens	2056	DBAL, ECYT5, EP, MVCD2	erythropoietin	erythropoietin|epoetin	7q22.1	7	NC_000007.14	100720468	100723700	plus	133170
C3	Mus musculus	12266	ASP, HSE-MSF, Plp	complement component 3	complement C3|acylation stimulating protein|complement component 3d|complement factor 3	17 29.72 cM	17	NC_000083.7	57510967	57535136	minus
PRL	Homo sapiens	5617	GHA1	prolactin	prolactin|decidual prolactin|growth hormone A1	6p22.3	6	NC_000006.12	22287246	22302835	minus	176760
CYBA	Homo sapiens	1535	CGD4, p22-PHOX	cytochrome b-245 alpha chain	cytochrome b-245 light chain|cytochrome b light chain|cytochrome b(558) alpha chain|cytochrome b(558) alpha-subunit|cytochrome b, alpha polypeptide|cytochrome b-245, alpha polypeptide|cytochrome b558 subunit alpha|flavocytochrome b-558 alpha polypeptide|neutrophil cytochrome b 22 kDa polypeptide|p22 phagocyte B-cytochrome|p22phox|superoxide-generating NADPH oxidase light chain subunit	16q24.2	16	NC_000016.10	88643289	88651053	minus	608508
APLN	Homo sapiens	8862	APEL, XNPEP2	apelin	apelin|AGTRL1 ligand|APJ endogenous ligand	Xq26.1	X	NC_000023.11	129645259	129654956	minus	300297
Agtr1a	Rattus norvegicus	24180	AT1, AT1A, AT1R, Agtr1	angiotensin II receptor, type 1a	type-1 angiotensin II receptor A|type-1A angiotensin II receptor|AT1 receptor A|angiotensin II type-1 receptor A|angiotensin II type-1A receptor|angiotensin receptor 1a|vascular type-1 angiotensin II receptor	17p12	17	NC_051352.1	34173446	34226892	minus
LRP5	Homo sapiens	4041	BMND1, EVR1, EVR4, HBM, LR3, LRP-5, LRP-7, LRP7, OPPG, OPS, OPTA1, PCLD4, VBCH2	LDL receptor related protein 5	low-density lipoprotein receptor-related protein 5|low density lipoprotein receptor-related protein 5|low density lipoprotein receptor-related protein 7	11q13.2	11	NC_000011.10	68298412	68449275	plus	603506
ANGPT1	Homo sapiens	284	AGP1, AGPT, AGPT-1, ANG1, HAE5	angiopoietin 1	angiopoietin-1|ANG-1	8q23.1	8	NC_000008.11	107249482	107497918	minus	601667
Epas1	Mus musculus	13819	HIF-2alpha, HIF2A, HLF, HRF, MOP2, bHLHe73	endothelial PAS domain protein 1	endothelial PAS domain-containing protein 1|EPAS-1|HIF-1-alpha-like factor|HIF-2-alpha|HIF-related factor|HIF1 alpha-like factor|HIF1alpha-like factor|HIF2-alpha|HLF (HIF1alpha-like factor)|Hif like protein|hypoxia inducible transcription factor 2alpha|hypoxia-inducible factor 2-alpha|mHLF	17 E4	17	NC_000083.7	87061292	87140838	plus
Ihh	Mus musculus	16147	HHG-2	Indian hedgehog	indian hedgehog protein	1 38.55 cM	1	NC_000067.7	74984474	74990831	minus
Casp8	Mus musculus	12370	CASP-8, FLICE, MACH, Mch5	caspase 8	caspase-8|Fas-linked ICE-like protease	1 29.19 cM	1	NC_000067.7	58834398	58886662	plus
C5	Homo sapiens	727	C5Da, C5b, CPAMD4, ECLZB, C5	complement C5	complement C5|C3 and PZP-like alpha-2-macroglobulin domain-containing protein 4|C5a anaphylatoxin|anaphylatoxin C5a analog|complement component 5|prepro-C5	9q33.2	9	NC_000009.12	120952335	121074865	minus	120900
Epo	Mus musculus	13856		erythropoietin	erythropoietin	5 76.5 cM	5	NC_000071.7	137481282	137484078	minus
Atf4	Mus musculus	11911	Atf-4, C/ATF, CREB-2, CREB2, TAXREB67	activating transcription factor 4	cyclic AMP-dependent transcription factor ATF-4|c/EBP-related ATF|cAMP-dependent transcription factor ATF-4|cAMP-responsive element-binding protein 2|cyclic AMP-responsive element-binding protein 2|tax-responsive enhancer element-binding protein 67 homolog|taxREB67 homolog	15 37.85 cM	15	NC_000081.7	80139385	80141746	plus
Lgals1	Mus musculus	16852	Gal-1, Galbp, L-14.5, L14, Lect14, galectin-1	lectin, galactose binding, soluble 1	galectin-1|14 kDa lectin|S-Lac lectin 1|beta-galactoside binding protein|beta-galactoside-binding lectin L-14-I|galaptin|lactose-binding lectin 1|lectin galactoside-binding soluble 1	15 37.7 cM	15	NC_000081.7	78810925	78814665	plus
SEMA3A	Homo sapiens	10371	COLL1, HH16, Hsema-I, Hsema-III, SEMA1, SEMAD, SEMAIII, SEMAL, SemD, coll-1	semaphorin 3A	semaphorin-3A|collapsin 1|sema domain, immunoglobulin domain (Ig), short basic domain, secreted, (semaphorin) 3A|semaphorin D|semaphorin III|semaphorin L	7q21.11	7	NC_000007.14	83955777	84492725	minus	603961
Ephx2	Mus musculus	13850	CEH, Eph2, SEH, sEP	epoxide hydrolase 2, cytoplasmic	bifunctional epoxide hydrolase 2|cytosolic epoxide hydrolase|epoxide hydratase|epoxide hydrolase 2C|soluble epoxide hydrolase	14 34.36 cM	14	NC_000080.7	66321821	66361971	minus
Mir223	Mus musculus	723814	Mirn223, miR-223, mmu-mir-223	microRNA 223		X C3	X	NC_000086.8	95286423	95286532	plus
IHH	Homo sapiens	3549	BDA1, HHG2	Indian hedgehog signaling molecule	indian hedgehog protein|Indian hedgehog homolog	2q35	2	NC_000002.12	219054424	219060921	minus	600726
Apln	Rattus norvegicus	58812	Apel	apelin	apelin|APJ endogenous ligand|apelin, AGTRL1 ligand	Xq36	X	NC_051356.1	127180801	127213567	minus
Malat1	Mus musculus	72289	2210401K01Rik, 9430072K23Rik, Neat2	metastasis associated lung adenocarcinoma transcript 1 (non-coding RNA)		19 A	19	NC_000085.7	5845718	5852700	minus
TEAD4	Homo sapiens	7004	EFTR-2, RTEF1, TCF13L1, TEF-3, TEF3, TEFR-1, hRTEF-1B	TEA domain transcription factor 4	transcriptional enhancer factor TEF-3|TEA domain family member 4|related transcription enhancer factor 1B|transcription factor 13-like 1|transcription factor RTEF-1|transcriptional enhancer factor 1-related|transcriptional enhancer factor 3	12p13.33	12	NC_000012.12	2959397	3040676	plus	601714
VASH1	Homo sapiens	22846	KIAA1036, TTCP 1	vasohibin 1	tubulinyl-Tyr carboxypeptidase 1|tubulin carboxypeptidase 1|tyrosine carboxypeptidase 1	14q24.3	14	NC_000014.9	76761468	76783015	plus	609011
Arg2	Mus musculus	11847	AII	arginase type II	arginase-2, mitochondrial|arginase II|kidney-type arginase|non-hepatic arginase|type II arginase	12 C3	12	NC_000078.7	79177562	79203075	plus
Angpt2	Rattus norvegicus	89805	Agpt2, Ang-2	angiopoietin 2	angiopoietin-2	16q12.5	16	NC_051351.1	71088364	71138805	plus
Ndp	Mus musculus	17986	NDh, Ndp	Norrie disease (pseudoglioma) (human)	norrin|norrie disease protein homolog	X 12.07 cM	X	NC_000086.8	16751760	16778013	minus
Ihh	Rattus norvegicus	84399		Indian hedgehog signaling molecule	indian hedgehog protein	9q33	9	NC_051344.1	76504315	76510532	minus
Tead4	Mus musculus	21679	ETFR-2, Etfr2, FR-19, Rtef1, TEAD-4, TEF-3, Tcf13r1, Tef3, Tefr, Tefr1, Tefr1a	TEA domain family member 4	transcriptional enhancer factor TEF-3|ETF-related factor-2|FGF-regulated 19|RTEF-1|TEF-1-related factor 1|TEF-1-related factor FR-19	6 62.92 cM	6	NC_000072.7	128204106	128277776	minus
NAA15	Homo sapiens	80155	Ga19, MRD50, NARG1, NAT1P, NATH, TBDN, TBDN100	N-alpha-acetyltransferase 15, NatA auxiliary subunit	N-alpha-acetyltransferase 15, NatA auxiliary subunit|N-terminal acetyltransferase|NMDA receptor regulated 1|NMDA receptor-regulated protein 1|gastric cancer antigen Ga19|protein tubedown-1|transcriptional coactivator tubedown-100|tubedown-1	4q31.1	4	NC_000004.12	139301505	139391384	plus	608000
SUCNR1	Homo sapiens	56670	GPR91	succinate receptor 1	succinate receptor 1|G-protein coupled receptor 91|P2Y purinoceptor 1	3q25.1	3	NC_000003.12	151873643	151884619	plus	606381
SCG3	Homo sapiens	29106	SGIII	secretogranin III	secretogranin-3	15q21.2	15	NC_000015.10	51681503	51721026	plus	611796
Scg3	Mus musculus	20255	1B1075, Chgd, SgIII	secretogranin III	secretogranin-3	9 42.32 cM	9	NC_000075.7	75550648	75591733	minus
ihhb	Danio rerio	30299	IHH, ehh, zgc:113262	Indian hedgehog signaling molecule b	indian hedgehog B protein|Indian hedgehog homolog b|echidna hedgehog protein|hh[b]|hhb		6	NC_007117.7	7059999	7082672	minus
Naa15	Mus musculus	74838	5730450D16Rik, 6330400I15, ASTBDN, Narg1, Tbdn-1, mNAT1	N(alpha)-acetyltransferase 15, NatA auxiliary subunit	N-alpha-acetyltransferase 15, NatA auxiliary subunit|N-terminal acetyltransferase 1|N-terminal aceyltransferase 1|NMDA receptor-regulated gene 1|NMDA receptor-regulated protein 1|protein tubedown-1|tubedown	3 C	3	NC_000069.7	51323437	51383406	plus
ihha	Danio rerio	619520	hha, ihh	Indian hedgehog signaling molecule a	Indian hedgehog signaling molecule a|Indian hedgehog homolog a|hh[a]|qhh		9	NC_007120.7	7358749	7367278	plus
Ndp	Rattus norvegicus	363443	Ndph, RGD1563968	norrin cystine knot growth factor NDP	norrin|NDP, norrin cystine knot growth factor|Norrie disease (pseudoglioma)|Norrie disease homolog|norrin-like	Xq11	X	NC_051356.1	5796487	5820934	plus
grd-1	Caenorhabditis elegans	181300	CELE_R08B4.1	GRounDhog (hedgehog-like family)	GRounDhog (hedgehog-like family)		X	NC_003284.9	11109440	11115887	plus
ndp	Danio rerio	100003793	si:ch211-222m21.5	norrin cystine knot growth factor NDP	norrin|Norrie disease (pseudoglioma)		9	NC_007120.7	33732954	33749593	minus
